# Supplementary material for: Assessment of a trap based Aedes aegypti surveillance program using mathematical modeling
Source: PLoS One. 2018 Jan 5;13(1):e0190673. doi: 10.1371/journal.pone.0190673 (PMC5755894; doi:10.1371/journal.pone.0190673)
Supplement: S1 Table — IMFA and temperature data. (XLS) [file pone.0190673.s001.xls]

## Sheet: IMFAweek
Year	Epid.week	Time	Andorinhas	Antonio Honorio	juncao1	BarroVermelho	juncao2	BentoFerreira	BoaVista	Bonfim	Caratoira	Centro	Condusa	Conquista	Consolacao	Cruzamento	daPenha	deLourdes	doCabral	doMoscoso	doQuadro	Engenharia	EnseadadoSua	Estrelinha	FonteGrande	ForteSaoJoao	Fradinhos	Goiabeiras	GrandeVitoria	Gurigica	Horto	IlhaBela	IlhadaFumaca	IlhadasCaieiras	IlhadeMonteBelo	IlhadeSantaMaria	IlhadoFrade	IlhadoPrincipe	Inhangueta	Itarare	JaboureAeroporto	JardimCamburi	JardimdaPenha	JesusdeNazareth	JoanaDArc	Jucutuquara	MariaOrtiz	MarioCipreste	Maruipe
2008	1	1	1.57	2.16667	0.5	0.727273	0.5	0.911111	0.75	0.705882	0.444444	1.04878	0.857143	0.8	0.4	1.09091	0.777778	0.166667	1	1.6	0	1	0.604651	0.428571	0.555556	1.33333	0.875	0.980769	1	0.92	1	0.764706	0.4	0.6	1.3125	0.944444	0.875	0.363636	0.6	0.5625	0.73913	0.978102	0.984375	3.2	0.85	0.5	0.916667	2.08333	0.307692
2008	2	2	1.57	2.16667	0.5	0.727273	0.5	0.911111	0.75	0.705882	0.444444	1.04878	0.857143	0.8	0.4	1.09091	0.777778	0.166667	1	1.6	0	1	0.604651	0.428571	0.555556	1.33333	0.875	0.980769	1	0.92	1	0.764706	0.4	0.6	1.3125	0.944444	0.875	0.363636	0.6	0.5625	0.73913	0.978102	0.984375	3.2	0.85	0.5	0.916667	2.08333	0.307692
2008	3	3	0.428571	0.666667	0	0.545455	0.5	0.6	0.571429	0.352941	0.545455	0.675676	0.285714	0.5	0.9	0.818182	0.555556	0.166667	0	0.8	0.428571	0.333333	0.733333	1.4	0.666667	1	0.75	0.980769	0.6875	0.576923	0.333333	1.05882	2.6	0.5	0.5	1.61111	0.3125	0.272727	0.842105	0.25	1.04	0.890411	0.907692	1.1	0.7	0.125	0.925	2.08333	1.26316
2008	4	4	0.285714	0.333333	0.5	1.36364	0.285714	1.02222	0.333333	0.555556	0.545455	0.692308	0.714286	0.444444	0.7	1	1.11111	0.666667	0.4	1.2	0.285714	0.666667	0.422222	0.8	0.888889	1.38889	1.625	1.19231	1.46667	1.11538	0.333333	1.05882	0.2	0.333333	0.875	1.44444	0.1875	0.181818	0.722222	0.875	0.92	0.880282	1.04615	0.777778	0.7	1	0.925	0.307692	0.85
2008	5	5	0.714286	1	0	0.545455	0.75	0.533333	0.25	0.666667	0.444444	0.878049	0.857143	0.3	0.2	0.545455	0.9	0.333333	1	1.4	0.428571	0.333333	0.444444	0.3	0.222222	0.444444	0.25	0.538462	0.285714	0.416667	0	0.941176	0.4	0.909091	1.25	0.722222	0.375	0.363636	1	0.4375	0.695652	0.702128	0.369231	0.6	0.45	0.5	0.75	0.769231	1
2008	6	6	0.428571	0.666667	0.5	0.363636	0.375	0.577778	0.25	0.705882	0.454545	0.486486	0.428571	0.111111	0.6	1.18182	0.4	0.333333	0.2	0.4	0.428571	0	0.6	0.25	0.444444	1	0.625	0.903846	0.6	1	0	0.470588	0.4	1.14286	0.625	1.33333	0.1875	0.363636	0.45	0.5625	0.56	0.689655	0.646154	0.4	0.6	0.375	1	0.384615	0.65
2008	7	7	0.285714	0	1	0.454545	0.375	0.622222	0.142857	0.611111	0.0909091	0.947368	0.285714	0.444444	0.2	0.727273	0.6	0.166667	0.4	0	1	1.66667	0.666667	0.444444	0.444444	0.5	0.375	1.07692	0.375	0.8	0	0.647059	1	0.333333	0.375	1.5	0.625	0	0.65	0.25	0.68	0.645833	0.704918	0.3	0.55	0.125	0.925	1	0.7
2008	8	8	0.571429	1.33333	2	0.636364	0.625	1.22222	0.75	1.38889	1.18182	1.02564	0.714286	0.444444	0.6	2.36364	1.9	0.166667	1.2	1.2	0.571429	2	1.24444	0.6	0.777778	1.22222	1	2.23077	1.3125	1.11538	0.333333	1	2.6	0.777778	0.3125	2	1.0625	0.272727	0.75	0.8125	1.84	1.05369	0.984615	1.6	1.55	0.75	1.35	0.153846	0.8
2008	9	9	1	0.333333	0.5	1	0.625	1.33333	0.125	1.77778	0.454545	0.794872	0.857143	0.888889	0.4	1.36364	1.3	0.333333	1.6	0.6	0.428571	2.66667	0.6	0.1	0.444444	0.833333	0.75	1.26923	0.5	0.730769	0.333333	1.41176	2.2	0.555556	0.5	0.888889	0.9375	0.454545	1.35	1.125	1.04	0.778523	0.969231	1	0.9	0.375	1.25	1	1.15
2008	10	10	0	0.666667	1.5	0.363636	0.25	0.4	0.375	1.33333	0.363636	0.461538	1	0.888889	0.9	0.545455	0.8	0	0.6	0	0.428571	1	0.688889	0.2	0.333333	0.611111	0.625	0.942308	1.25	0.307692	0.333333	0.705882	1.6	0.666667	0.4375	0.888889	0.5	0.181818	0.55	0.3125	0.72	0.590604	0.815385	0.1	0.7	0.375	0.625	0.615385	0.55
2008	11	11	1	0.666667	0.5	0.636364	0.625	1.04444	0.875	1.11111	0.818182	0.74359	0.285714	0.777778	1	1.18182	0.6	0	1	0.2	0.428571	1	0.977778	0.6	1.22222	0.777778	0.75	1.21154	0.1875	0.846154	0	1.52941	1.4	0.444444	0.5	1	0.9375	0.545455	0.95	0.6875	0.88	0.939597	0.907692	0.4	0.25	0.375	0.675	0.153846	0.65
2008	12	12	1.57143	0.5	0.5	0.545455	0.75	0.911111	0.625	1.05556	0.818182	0.692308	1.71429	0.666667	1	1.63636	1	0.166667	0.6	0	0.428571	1.66667	0.711111	0.2	0.888889	0.888889	0.625	1.07692	0.5625	0.730769	0	0.882353	0.8	0.222222	0.75	2.16667	0.5	0.272727	0.95	0.5625	1.2	0.724832	0.707692	1.2	0.45	0.125	0.75	0.307692	0.8
2008	13	13	0.714286	0.333333	0.5	1	0.875	1.02222	0.375	0.555556	0.272727	0.692308	0.428571	1.11111	0.8	0.727273	1.6	0.333333	1.2	0.2	0.714286	3	0.6	0.4	0.444444	1	0.5625	1.11538	1	0.846154	0	0.470588	0.2	0.222222	0.375	0.722222	0.5	0.545455	1.45	1	0.68	0.872483	1	0.9	0.5	0.125	0.65	0.692308	0.6
2008	14	14	0.714286	0.5	1	0.454545	1.125	0.577778	0	0.833333	0.636364	0.410256	1.71429	1.22222	0.3	0.636364	0.5	0	0.8	0.2	0.428571	0.666667	0.555556	0.3	0.777778	0.333333	0.8125	1.01923	0.8125	0.384615	0	0.294118	0.2	0.444444	0.3125	0.666667	0.4375	1.09091	0.65	1	0.64	0.651007	0.630769	1	0.5	0	0.525	1.07692	0.25
2008	15	15	0.571429	0.666667	0	0.272727	0.125	0.644444	0.25	0.5	0.545455	0.153846	0.285714	0.666667	0.4	0.636364	0.4	0.333333	0.4	0.2	0.428571	1	0.577778	0.1	0.444444	0.5	0.625	0.576923	0.5	0.538462	0	0.529412	1	0.222222	0.25	0.888889	0.3125	0.545455	0.75	0.375	0.88	0.563758	0.676923	0.7	0.2	0.25	0.625	0	0.25
2008	16	16	2.14286	0.833333	0.5	0.272727	0.875	0.733333	0.375	1	0.272727	0.512821	1	0.333333	0.7	0.545455	0.9	0	1	0.2	0	1	0.777778	0.3	0.666667	0.888889	0.4375	1.09615	1.0625	0.307692	0.333333	0.941176	1	0.666667	0.4375	1.22222	0.1875	1.36364	1.05	0.5625	0.76	0.758389	1	0.9	0.3	0.375	0.6	0.461538	0.2
2008	17	17	1	1.16667	0.5	0.363636	0.625	1.17778	0	1.22222	0.454545	0.692308	0	0.444444	0.8	1.45455	0.5	0.166667	2.6	0.8	0.571429	1.66667	0.711111	0.3	0.444444	0.777778	0.8125	1.03846	0.8125	0.653846	0	0.470588	0.8	0.111111	0.375	0.666667	0.5625	0.727273	0.9	0.3125	0.64	1.01342	0.876923	1	0.55	0.5	0.825	0.230769	1.05
2008	18	18	2	1	0.5	0.181818	0.25	0.844444	0	0.722222	0.363636	0.461538	1	0.666667	1.2	1.18182	1	0	1.6	0.4	0.714286	2	0.666667	0.1	0.777778	0.611111	0.4375	1.21154	0.75	0.423077	0.666667	0.411765	0.8	0.222222	0.625	0.777778	0.5	0.727273	0.8	0.6875	0.96	0.604027	0.6	0.5	0.4	0.375	0.625	0.538462	0.35
2008	19	19	1.85714	1	0.5	0.0909091	1.25	0.622222	0.25	0.944444	0.727273	0.74359	1.14286	0.444444	0.4	0.818182	1.1	0	0.6	0	0.285714	1	0.688889	0	0.777778	0.611111	0.5	0.961538	0.875	0.346154	0.333333	0.411765	0.4	0.111111	0.875	1.16667	0.625	0.454545	0.4	0.625	0.52	0.61745	0.415385	0.1	0.3	0.25	0.775	0.846154	0.65
2008	20	20	0.428571	0.166667	2	0	0.375	0.466667	0.125	0.888889	0	0.564103	0.571429	0.111111	0.3	0.545455	0.2	0	0.6	0.6	0.571429	0.333333	0.422222	0.2	0.777778	0.277778	0.8125	0.788462	1.125	0.115385	0.666667	0.411765	0.4	0.222222	0.625	0.444444	0.5625	0.636364	0.45	0.25	0.56	0.469799	0.276923	0.9	0.35	0	0.6	0.538462	0.55
2008	21	21	0.285714	0.666667	0	0.181818	0.375	0.355556	0	0.333333	0.0909091	0.205128	0.142857	1.11111	0.7	0.454545	0.2	0.166667	0	0	0.285714	0	0.244444	0	0	0.0555556	0.0625	0.5	0.25	0.192308	0	0.352941	0.4	0	0.25	0.277778	0.125	0.0909091	0.45	0.3125	0.16	0.308725	0.184615	0.2	0.05	0	0.2	0.384615	0.2
2008	22	22	0.714286	0.333333	0	0.363636	0.5	0.488889	0.375	0.666667	0.181818	0.153846	0.571429	0.777778	0	0.272727	1.1	0.333333	0.2	0.2	0.142857	0	0.311111	0.1	0.777778	0.777778	0.8125	0.365385	0.25	0.346154	0	0.588235	0.4	0.111111	0.1875	1	0.25	0.0909091	0.45	0.0625	0.32	0.516779	0.446154	0.1	0.1	0.125	0.375	0.230769	0.35
2008	23	23	1.28571	0.166667	0.5	0.272727	0.375	0.488889	0.125	0.611111	0.0909091	0.25641	0.285714	0.222222	0.3	0.545455	0.3	0.166667	0.8	0	0.142857	0.666667	0.4	0.2	0.444444	0.333333	0.125	0.269231	0.4375	0.192308	0	0.235294	0.8	0.111111	0.0625	1.16667	0.25	0.272727	0.3	0.25	0.32	0.402685	0.338462	0.4	0.4	0	0.6	0.307692	0.1
2008	24	24	0.285714	0.333333	0.5	0.0909091	0.125	0.311111	0.125	0.5	0.272727	0.230769	0.285714	0.111111	0.3	0.818182	0.4	0	0.2	0.2	0.142857	0.333333	0.222222	0	0.111111	0.222222	0.375	0.25	0.125	0.423077	0.333333	0.176471	0.2	0.333333	0.25	0.555556	0.25	0.363636	0.35	0.25	0.36	0.348993	0.246154	0.2	0.2	0	0.25	0.0769231	0.15
2008	25	25	0.285714	0.333333	0	0.636364	0.625	0.444444	0.125	0.555556	0.545455	0.461538	0.142857	0.555556	0.4	0.636364	0.6	0.333333	1	0.2	0.571429	0.666667	0.533333	0.1	0.444444	0.388889	0.5625	0.75	0.3125	0.269231	0	0.352941	1	0	0.5625	1.66667	0.5	0.0909091	1.4	0.625	0.32	0.536913	0.4	0.4	0.8	0.25	0.55	0.307692	0.5
2008	26	26	1.14286	0.5	0	0.181818	0.75	0.466667	0.125	0.777778	0.272727	0.717949	0.285714	0.666667	0.7	0.363636	0.1	0.166667	1.2	0	1.28571	0.333333	0.488889	0.2	1.44444	0.944444	0.4375	0.788462	0.375	0.538462	0	0.705882	0.6	0	0.375	1.05556	0.25	0.272727	0.9	0.4375	0.48	0.483221	0.523077	0.3	0.35	0.125	0.325	0.384615	0.35
2008	27	27	0.428571	0.5	0	0.0909091	0.75	0.422222	0.125	0.388889	0.363636	0.205128	0.428571	0.222222	0.1	0.272727	0.7	0	0.4	0	0	0	0.155556	0	0	0.0555556	0.25	0.538462	0.125	0.269231	0	0.352941	0.6	0.111111	0.125	0.611111	0.1875	0.181818	0.05	0.25	0.2	0.33557	0.215385	0.3	0.25	0.25	0.425	0.230769	0.15
2008	28	28	0.571429	0.333333	0.5	0.0909091	0.25	0.355556	0.25	0.333333	0.272727	0.128205	0.428571	0.777778	0.3	0.181818	0.3	0.166667	0.4	0.4	0	0.333333	0.333333	0	0.555556	0.111111	0.375	0.384615	0.125	0.192308	0.333333	0.588235	0	0.111111	0.0625	0.611111	0.25	0.0909091	0.45	0.25	0.52	0.38255	0.292308	0.3	0.3	0	0.275	0.0769231	0.5
2008	29	29	0.571429	0.166667	0.5	0.272727	0.375	0.266667	0	0.388889	0.272727	0.205128	0.571429	0.333333	0.3	0.363636	0.2	0	0	0	0.142857	0	0.133333	0.1	0.222222	0.0555556	0.0625	0.480769	0.375	0.192308	0	0.176471	0	0	0.125	0.5	0.1875	0.272727	0.3	0.0625	0.24	0.241611	0.353846	0.1	0.1	0.125	0.25	0.307692	0.15
2008	30	30	0.428571	0.166667	0.5	0.363636	0.125	0.266667	0.125	0.111111	0.181818	0.25641	0.571429	0.555556	0.9	0.454545	0.1	0	0	0	0.142857	0.333333	0.488889	0.1	0.444444	0.555556	0.3125	0.557692	0.25	0.5	0	0.235294	0.4	0	0.75	0.944444	0.5625	0.727273	0.35	0.1875	0.08	0.248322	0.4	0.5	0.5	0.375	0.325	0	0.3
2008	31	31	0.571429	0.166667	1	0.0909091	0.5	0.266667	0.25	0.277778	0.363636	0.25641	0.571429	0.333333	0.5	0.545455	0.1	0	1.2	0	0.142857	1.66667	0.377778	0.1	0.111111	0.611111	0.375	0.615385	0.1875	0.423077	0	1.11765	0	0.111111	0.25	0.611111	0.3125	0.181818	0.5	0.25	0.4	0.308725	0.523077	0.4	0.25	0.5	0.35	0.230769	0.15
2008	32	32	1	0.166667	0.5	0.272727	0.625	0.466667	0.25	0.333333	0.454545	0.461538	0.142857	0.111111	0	0.818182	0.3	0	1	0.2	0.285714	1.33333	0.244444	0.1	0.555556	0.388889	0.3125	0.326923	0.25	0.153846	0	0.294118	0.6	0.222222	0.3125	0.611111	0.375	0.181818	0.85	0.4375	0.12	0.503356	0.415385	0.3	0.4	0	0.275	0.307692	0.45
2008	33	33	0.142857	0.166667	0	0.181818	0.625	0.4	0	0.611111	0.363636	0.179487	0.857143	0.333333	0.1	0.181818	0.2	0	0.2	0.2	0.285714	0.333333	0.288889	0	0.444444	0.222222	0.3125	0.461538	0.375	0.423077	0	0.352941	0	0	0.1875	0.777778	0.3125	0.0909091	0.5	0.25	0.36	0.348993	0.276923	0.6	0.2	0.5	0.35	0.384615	0.25
2008	34	34	0.142857	0.166667	0	0.545455	0.25	0.311111	0.125	0.388889	0.272727	0.282051	0.142857	0.222222	0.8	0.272727	0.1	0	0.4	0	0.142857	0.333333	0.422222	0	0.111111	0.277778	0.4375	0.730769	0.375	0.192308	0	0.588235	0.2	0	0.0625	0.666667	0.125	0.454545	0.25	0.3125	0.4	0.610738	0.384615	0.4	0.2	0.125	0.4	0.0769231	0.25
2008	35	35	0.142857	0.333333	0	0	0.375	0.355556	0	0.5	0.363636	0.102564	0.428571	0.666667	0.6	0.545455	0.2	0.166667	0.2	0.2	0.142857	1	0.266667	0.1	0.777778	0.333333	0.125	0.538462	0.1875	0.423077	0	0.588235	0.4	0.333333	0.25	0.5	0.0625	0.181818	0.2	0.125	0.32	0.268456	0.4	0.6	0.3	0.25	0.35	0.153846	0.15
2008	36	36	0.428571	0.166667	0	0.0909091	0.5	0.311111	0	0.222222	0.363636	0.225	0.571429	0.777778	0.8	0.181818	0.2	0.166667	0.4	0.2	0.142857	0.666667	0.422222	0.2	0	0.111111	0.25	0.442308	0.4375	0.269231	0.333333	0.352941	0.2	0.222222	0.3125	0.333333	0.1875	0.181818	0.3	0.375	0.24	0.342282	0.169231	0.1	0.4	0.25	0.525	0.230769	0.15
2008	37	37	0.571429	0.166667	0	0.272727	0.125	0.666667	0.25	0.333333	0.818182	0.710526	0.142857	0.333333	0.9	1.45455	0.6	0.166667	0.6	3	0.285714	0.666667	0.488889	0.8	0.333333	0.555556	0.375	0.596154	0.5625	0.423077	0	0.117647	0.4	0.333333	0.5	0.722222	0.1875	0.181818	0.3	0.5	0.84	0.483221	0.676923	0.4	0.35	0.375	0.4	0.153846	0.25
2008	38	38	0.857143	0.5	0	0.272727	0.625	0.511111	0.125	0.722222	0.0909091	0.230769	0.714286	0.444444	0.4	0.727273	0.5	0.166667	0.2	0.2	0	0	0.266667	0.1	0.111111	0.722222	0.1875	0.807692	0.5	0.153846	0	0.411765	0.2	0	0.25	1.22222	0.1875	0.363636	0.55	0.125	0.64	0.469799	0.4	0.2	0.05	0.125	0.375	0.461538	0.15
2008	39	39	0.285714	0	0	0.363636	0.5	0.444444	0	0.388889	0.272727	0.205128	0.142857	0.222222	0.7	0.454545	0.2	0	0.2	0.4	0.428571	1	0.311111	0	0.222222	0.444444	0.5625	0.557692	0.375	0.115385	0	0.352941	0.2	0.555556	0.5625	0.555556	0.125	0	0.3	0.25	0.52	0.281879	0.292308	0.1	0.1	0.125	0.275	0.384615	0
2008	40	40	0.428571	0.333333	1	0.0909091	0.5	0.4	0.125	0.388889	0.272727	0.230769	0.285714	0.555556	0.5	0.181818	0.2	0.166667	0.2	0.6	0.142857	0.333333	0.288889	0.3	0.444444	0.555556	0.3125	0.403846	0.9375	0.461538	1.33333	0.0588235	0.4	0.111111	0.1875	0.5	0.1875	0.181818	0.4	0.125	0.32	0.362416	0.523077	0.6	0.25	0.375	0.375	0.230769	0.25
2008	41	41	0.571429	0.5	1	0.0909091	1.25	0.6	0	0.388889	0.0909091	0.358974	0.428571	0.555556	0.4	0.454545	0.5	0	0.2	0.2	0	0.666667	0.377778	0.3	0.444444	0.611111	0.375	1.17308	0.25	0.423077	0.333333	0.176471	0.6	0.333333	0.5625	0.944444	0.25	0	0.85	0.3125	0.92	0.469799	0.476923	0.3	0.6	0.25	0.375	0.153846	0.3
2008	42	42	0.571429	0.666667	0	0.0909091	0.5	0.355556	0.75	0.444444	0.363636	0.282051	0.571429	0.222222	0.6	0.272727	0.1	0	0.2	0.2	0	0	0.155556	0.6	0	0.222222	0.4375	0.538462	0.4375	0.346154	0	0.176471	1.2	0.111111	0.25	0.611111	0.125	0.272727	0.25	0.1875	0.24	0.436242	0.261538	0.3	0.2	0.375	0.35	0.307692	0.35
2008	43	43	0.285714	0.666667	0	0	0.375	0.4	0.125	0.388889	0.181818	0.25641	1.85714	0.222222	0.1	0.181818	0.3	0.166667	0.2	0.2	0.142857	0	0.333333	0.1	0.333333	0.444444	0.5	0.730769	0.9375	0.269231	0	0.176471	0.6	0.555556	0.375	0.722222	0.25	0	0.6	0.0625	0.28	0.201342	0.261538	0.3	0.25	0	0.2	0.0769231	0.2
2008	44	44	1.57143	1.16667	0	0.0909091	1	1.04444	0.25	0.944444	0.636364	0.615385	1	0.888889	0.9	1.81818	0.5	0	1.6	0.6	0.428571	0.333333	0.644444	0.1	0.555556	0.611111	0.5625	1.36538	1.5625	0.346154	0.666667	0.647059	1	0.444444	0.8125	1.72222	0.625	0.272727	0.95	0.5625	0.92	0.825503	0.846154	1.2	1.55	0.625	1.225	0.384615	0.75
2008	45	45	0.571429	1	0	0.0909091	0.5	0.866667	0.625	0.555556	0.272727	0.666667	0.857143	0.555556	0.3	1.27273	0.3	0.333333	0.6	0.6	0.428571	1	0.533333	0.3	0.888889	1.16667	0.6875	0.884615	0.625	0.269231	0.333333	0.117647	0.6	0.333333	1.0625	1.55556	0.8125	0.363636	0.55	0.25	0.8	0.718121	1.03077	0.5	0.9	0.625	0.675	0.846154	0.55
2008	46	46	0.571429	0.333333	0	0.0909091	0.375	0.733333	0	0.833333	0.0909091	0.384615	0.571429	0.666667	0.2	0.727273	0.2	0.166667	1.4	0.2	0.142857	0.333333	0.311111	0.1	0.222222	0.833333	0.6875	0.634615	0.375	0.346154	0	0.411765	1.2	0	0.375	0.611111	0.4375	0.181818	0.5	0.375	0.96	0.516779	0.369231	0.8	0.5	0.625	0.55	0.153846	0.5
2008	47	47	0.571429	0	0	0.727273	0.25	0.577778	0.5	0.555556	0.363636	0.358974	1.14286	0.111111	0.2	0.454545	0	0.166667	0.6	0.2	0	0.333333	0.377778	0	0.333333	0.444444	0.5625	0.75	0.25	0.346154	0.666667	0.235294	1.8	0.333333	0.25	0.888889	0.375	0.181818	0.3	0.125	0.6	0.395973	0.353846	0.2	0.85	0.375	0.5	0.461538	0.2
2008	48	48	0.285714	0	0	0.181818	0	0.111111	0.125	0.166667	0	0.153846	0.285714	0	0.3	0	0	1	0	0.4	0.142857	0	0.155556	0	0.222222	0.166667	0.125	0.442308	0	0.230769	0	0.0588235	0.2	0.111111	0.1875	0.111111	0.1875	0.0909091	0.15	0.125	0.36	0.214765	0.230769	0.2	0.2	0.25	0.275	0.0769231	0.05
2008	49	49	0.571429	0.333333	0	0.181818	0.25	0.2	0.125	0.333333	0.181818	0.0512821	0.142857	0.222222	0.1	0.272727	0	0	1.2	0.2	0.285714	1	0.244444	0.2	0.444444	0.111111	0.1875	0.423077	0	0.230769	0.333333	0.0588235	0.6	0.111111	0.375	1.22222	0.25	0	0.2	0.5	0.36	0.268456	0.138462	0.3	0.65	0.5	0.575	0.0769231	0.15
2008	50	50	1.42857	0.333333	0	0.181818	0.5	0.355556	0	0.611111	0.363636	0.564103	0.428571	0.555556	0.3	0.727273	1.1	0.166667	1.4	0	0	1	0.4	0	0.777778	0.833333	0.625	0.557692	0.625	0.5	0.666667	0.294118	0.2	0.111111	0.4375	1.33333	0.75	0.272727	0.6	0.6875	0.68	0.557047	0.476923	0.4	0.55	0.375	0.725	0.230769	0.85
2008	51	51	1	0.166667	1	0.727273	0.5	0.466667	0.875	0.555556	0.545455	0.794872	1.14286	1	0.6	0.909091	0.4	0	0.2	0.6	0.428571	0.333333	0.777778	0.6	0.333333	0.222222	0.6875	1.19231	0.5	0.615385	0.666667	0.235294	0.6	0.222222	0.6875	0.888889	0.375	0.181818	0.65	0.0625	0.44	0.651007	0.0461538	0.9	1	0.375	0.55	0.384615	0.2
2008	52	52	0.428571	1	0	0.272727	0.625	0.711111	0.125	0.444444	0.272727	0.538462	0.857143	0.875	0.4	0.818182	0.1	0.5	0.2	0.4	1.14286	0.333333	0.288889	0.1	1	0.444444	0.25	0.615385	0.3125	0.538462	0.666667	0.529412	0.2	0	0.875	0.611111	0.625	0.181818	0.4	0.25	1.12	0.449664	0.323077	0.6	0.95	0.125	0.65	0.384615	0.3
2008	53	53	0.428571	0.666667	0	0.454545	1	0.533333	0.125	0.0555556	0.181818	0.384615	0.142857	0	0.4	0.181818	0.545455	0.166667	0.6	0	0.285714	0.666667	0.177778	0.3	0.777778	0.333333	0.4375	0.692308	0.4375	0.346154	0.333333	0.117647	0.4	1.22222	0.375	0.722222	0.5	0.363636	0.35	0.375	0.28	0.375839	0.276923	0	0.55	0.25	0.45	0.461538	0.3
2009	1	54	0.272727	1.33333	0	0.545455	0.75	0.844444	0.125	0.888889	0.636364	1.30769	1.71429	0.444444	0.3	1.18182	0.4	0.666667	1.6	2.2	0.142857	1.66667	0.422222	0.5	0.555556	0.777778	1	1.17308	0.625	0.346154	1.66667	0.588235	0.2	0.222222	0.4375	0.777778	0.875	0.363636	0.7	0.8125	0.48	0.832215	0.8	1	0.75	0.5	0.95	0.923077	0.4
2009	2	55	1.09091	0	0.5	0.0909091	0.25	0.511111	0.5	0.388889	0.363636	0.615385	0.571429	0.222222	0.4	0.636364	0.4	0	0.6	0.4	0.571429	1	0.533333	0.2	0.111111	0.111111	0.4375	0.615385	0.375	0.538462	1	0.470588	0.6	0	1.0625	1	0.875	0.181818	0.65	0.375	0.84	0.516779	0.523077	0.4	0.55	0	0.780488	0.307692	0.05
2009	3	56	1.54545	0.666667	0	0.363636	1.625	1.22222	0.25	0.722222	0.727273	0.666667	1.14286	0.333333	0.7	1.90909	1.4	0.5	0.8	0.4	0.714286	2.66667	0.666667	0.4	0.888889	1	0.625	1.32692	1	0.384615	2.33333	0.588235	1	0.333333	1	2.22222	1.1875	0.454545	1.35	0.375	1.32	1.13423	0.723077	2	0.95	0.625	1.3	1	1.25
2009	4	57	0.454545	0.5	0	0.545455	0.375	0.533333	0.25	0.333333	0.0909091	0.410256	1	0.222222	0.5	0.454545	0.5	0	0.8	0.2	0.571429	0.333333	0.488889	0.4	0.444444	0.555556	0.625	0.673077	0.5	0.461538	0.666667	0.529412	0.6	0.222222	0.5625	1.16667	0.375	0.454545	0.75	0.4375	0.72	0.436242	0.4	0.1	0.85	0.375	0.575	0.153846	0.7
2009	5	58	0.272727	0.833333	1	0.0909091	0.125	0.911111	0.25	0.555556	0.545455	0.641026	0.428571	1	0.1	0.636364	0.2	0.333333	1.2	0.8	0.285714	1	0.444444	0.3	0.555556	1.11111	0.9375	0.884615	0.75	0.615385	1	0.411765	0.2	0.111111	0.625	1	0.625	0.636364	0.9	0.75	0.36	0.852349	0.538462	1.5	0.8	1	0.925	0.461538	0.4
2009	6	59	1.09091	0.5	0	0.454545	0.125	1.06667	0.5	0.944444	0.727273	0.846154	0.571429	0.444444	0.3	0.909091	1.2	0.333333	1.6	1	0	1	0.622222	0.7	1.33333	1	0.9375	1.90385	1.3125	0.461538	0	0.529412	0.6	0	1	2.55556	0.8125	0.363636	0.65	1.0625	1.08	0.805369	1.03077	0.8	0.7	0.75	1.025	0.615385	0.75
2009	7	60	1.27273	1.33333	0	0.181818	0.125	0.711111	0.25	0.333333	0.181818	0.384615	1.28571	0.666667	0.6	0.636364	0.2	0	0.2	1	0.428571	0.333333	0.444444	0.2	0.333333	0.888889	0.5625	0.826923	0.5625	0.5	0	0.235294	0.2	0	1.0625	1.05556	0.625	0.363636	0.8	0.4375	0.72	0.583893	0.584615	0.5	0.75	0.625	0.7	0.230769	0.55
2009	8	61	0.636364	0.333333	0.5	0.181818	0.375	0.422222	0.25	0.111111	0.454545	0.410256	0.285714	0.222222	1.1	0.545455	0.3	0.166667	0.2	1	0.285714	0.333333	0.444444	0.4	0	0.333333	0.4375	0.673077	0.375	0.346154	0	0.294118	0.6	0	0.5	1.33333	0.375	0.272727	0.4	0.875	0.52	0.496644	0.461538	0.7	0.45	0.125	0.525	0.692308	0.3
2009	9	62	0.0909091	0.833333	0	0.363636	0.75	0.444444	0.375	0.388889	0.818182	0.410256	0.428571	0.333333	0.3	0.454545	1.1	0.5	1	0.6	1.28571	0	0.555556	0.5	0.555556	1	0.4375	0.788462	0.4375	0.576923	0.666667	0.588235	1	0	0.5625	1.27778	0.0625	0.181818	1	0.25	0.16	0.47651	0.492308	0.9	0.35	1.125	0.625	0.461538	0.3
2009	10	63	0.545455	0.5	1.5	0.181818	0.375	0.644444	0.625	0.388889	0.363636	0.641026	1.71429	0.333333	0.5	0.909091	1	0	2	0.6	0.428571	1.33333	0.555556	0.6	1.55556	0.5	0.8125	1.61538	1.625	0.423077	1	0.470588	0.4	0.222222	0.875	0.944444	0.625	0.363636	1.65	0.1875	0.44	0.691275	0.892308	1.1	0.55	0.75	0.775	0.692308	0.45
2009	11	64	0.545455	0.666667	0	0.25	0.375	0.466667	0.125	0.888889	0.545455	0.487179	0.714286	0.75	0.2	1.72727	0.3	0.166667	0	2.2	2	1.66667	0.533333	0.5	0.222222	0.277778	0.25	1.17308	0.6875	0.576923	0.333333	0.705882	1.4	0.333333	0.5	0.222222	0.6875	0.272727	0.35	0.4375	0.96	0.386667	0.476923	0.6	0.7	0.5	0.7	0.692308	0.3
2009	12	65	0.272727	0.166667	0	0.363636	0.125	0.311111	0.25	0.111111	0.272727	0.589744	0	0	0.3	0.454545	0.3	0.166667	0.6	0.4	0.428571	1.33333	0.266667	0.3	0.333333	0.111111	0.4375	0.615385	0.25	0.307692	0	0.176471	0	0	0.375	0.277778	0.4375	0.363636	0.2	0.3125	0.4	0.313333	0.476923	0.2	0.3	0.125	0.25	0.538462	0.05
2009	13	66	0.272727	0.333333	0.5	0.333333	0.75	0.266667	0.125	0.5	0.615385	0.184211	0.142857	0	0	0.363636	0.5	0	0	0	0	0.333333	0.133333	0.4	0.777778	0.722222	0.0625	0.396226	0.3125	0.0384615	0	0	0	0.333333	0	0.166667	0.5625	0.0909091	0.4	0.75	0.32	0.326667	0.323077	0.4	0.25	0	0.175	0.923077	0.2
2009	14	67	0.545455	0.5	0	0.0909091	0.25	0.347826	0.25	0.5	0.416667	0.297297	0.625	0.222222	0.3	0.357143	0.2	0.166667	0.6	0.2	0.363636	1.33333	0.266667	0.8	0.555556	0.2	0.0625	0.403509	0.3125	0.346154	1.66667	0.777778	1.2	0.125	0.375	0.263158	0.25	0	0.4	0.125	0.76	0.407895	0.426471	0.0833333	0.0952381	0.25	0.4	0.428571	0.047619
2009	15	68	0.545455	0	0	1.09091	0.75	0.4	0.222222	0	0.636364	0.382979	0.4	0.111111	0.230769	0.0909091	0.6	0.5	0	0.8	0.571429	0.333333	0.326087	0.6	0.666667	0.736842	0.375	0.653846	0.375	0.461538	0	0.411765	0	0.5	0.5	0.388889	0.625	0.181818	0.7	0.875	0.44	0.604027	0.567164	1.09091	0.0952381	0.25	0.666667	0.5	0.47619
2009	16	69	0.454545	1.16667	0.5	0.181818	0.25	0.822222	0.25	0.588235	1.27273	0.325	0.285714	0.222222	1.1	0.727273	0.6	0.333333	0.6	0.8	0.571429	0.666667	0.422222	0.4	0.222222	1	0.375	0.807692	0.75	0.576923	0.333333	0.235294	0.8	0.111111	0.375	0.277778	0.4375	0.307692	0.1	0.5625	0.84	0.644295	0.602941	0.4	0.2	0	0.65	0.615385	0.9
2009	17	70	0.181818	0.666667	0.5	0.0909091	0.5	0.444444	0.5	0.5	0.272727	0.325	0.571429	0.5	0.3	0.363636	0.2	0	0.25	0.2	0.428571	0.666667	0.288889	0.2	0.222222	0.166667	0.3125	0.442308	0.0625	0.346154	0	0.294118	0.2	0.555556	0.25	0.611111	0.875	0.272727	0.85	0.375	0.4	0.38255	0.30303	0.6	0.3	0.375	0.425	0.166667	0.65
2009	18	71	0.363636	0.833333	0	0.0909091	0.25	0.488889	0	0.388889	0.363636	0.421053	0.142857	0.222222	0.4	1.54545	0.6	0.166667	0.8	0.8	0.285714	0.333333	0.577778	0.7	0.222222	0.222222	0.5625	0.615385	0.375	0.230769	0	0.529412	0.8	0.222222	0.5	0.944444	0.375	0.454545	0.3	0.5	0.28	0.610738	0.6	0.3	0.3	0.375	0.675	0.384615	0.2
2009	19	72	0.818182	0.166667	1	0.0909091	0.375	0.711111	0.25	0.388889	1	0.333333	0.285714	1.22222	0.4	0.636364	1.1	0.333333	0.8	0.8	1.28571	0.666667	0.733333	0.5	0.444444	0.5	0.4375	0.865385	1	0.692308	0.333333	0.470588	0	0	0.1875	0.611111	0.5	0.363636	0.8	0.625	0.64	0.697987	0.815385	0.7	0.6	0.5	0.85	0.0769231	0.5
2009	20	73	0.727273	0	0	0.0909091	0.375	0.8	0.125	0.722222	1.27273	0.538462	0.142857	0.555556	0.3	0.545455	0.8	0.166667	0.2	0.6	0.428571	0	0.644444	0.3	0.111111	0.5	0.8125	0.826923	0.5625	1.15385	0	0.411765	0.4	0.222222	0.4375	1.05556	0.3125	0.454545	0.55	0.625	0.56	0.66	0.538462	0.6	0.65	0.125	0.5	0.846154	0.15
2009	21	74	1.27273	0.333333	0	0.272727	0.25	0.711111	0.375	0.555556	0.454545	0.538462	0.285714	0	0.1	0.545455	0.2	0	0.4	0.2	0.428571	0	0.577778	0.2	0.333333	0.5	0.25	0.538462	0.4375	0.653846	0	0.176471	0.2	0.111111	0.375	0.611111	0.375	0.0909091	0.6	0.1875	0.68	0.483221	0.415385	0.3	0.45	0.625	0.225	0.307692	0.15
2009	22	75	0.272727	0.833333	0	0.272727	0.75	0.622222	0	0.611111	0.363636	0.307692	0.857143	0.25	0.4	0.583333	0.4	0.166667	0.2	0.2	1.14286	0	0.666667	0.1	1	0.5	0.4375	0.557692	0.75	0.461538	1	1	0.4	0.111111	0.125	0.333333	0.3125	0	0.3	0.5625	0.48	0.463087	0.492308	0.3	0.5	0.444444	0.463415	0.538462	0.2
2009	23	76	0.272727	0	0	0.363636	0	0.333333	0.25	0.166667	0.727273	0.179487	0.142857	0	0.6	0.545455	0.3	0	0	0.4	0.142857	0.333333	0.266667	0	0.666667	0.166667	0.1875	0.634615	0.1875	0.192308	0	0.470588	0.6	0.444444	0.1875	0.388889	0.0625	0.0909091	0.45	0.25	0.24	0.255034	0.384615	0.5	0.25	0.222222	0.175	0.307692	0.15
2009	24	77	0.363636	0.166667	0	0.0909091	0.625	0.244444	0.375	0.111111	0.363636	0.333333	0.142857	0	0.3	0.181818	1	0.166667	0.6	0	0	0	0.266667	0.4	0.111111	0.111111	0.2	0.307692	0.1875	0.269231	0	0.235294	0.2	0.555556	0.375	0.444444	0.1875	0.363636	0.2	0.25	0.16	0.228188	0.307692	0	0.2	0	0.35	0.153846	0.15
2009	25	78	0.181818	0.166667	0.5	0.272727	0.375	0.222222	0	0.333333	0	0.102564	0.285714	0	0.4	0.0909091	0.3	0	0.2	0.2	0.428571	0	0.133333	0.2	0.111111	0	0.0625	0.288462	0.125	0.0384615	0	0.235294	0.2	0.333333	0.1875	0.222222	0.25	0.181818	0.3	0.25	0.12	0.134228	0.184615	0.4	0.25	0	0.225	0.0769231	0.1
2009	26	79	0.0909091	0	0	0.272727	0	0.355556	0.125	0.222222	0.0909091	0.0512821	0.142857	0.111111	0.3	0.454545	0.2	0	0	0	0.714286	0	0.155556	0.4	0.444444	0.277778	0.1875	0.576923	0.5625	0.346154	0	0.117647	0.4	0.333333	0.3125	0.777778	0.125	0	0.05	0.25	0.08	0.187919	0.353846	0.1	0.2	0.125	0.3	0.153846	0.2
2009	27	80	0.272727	0.166667	0	0.0909091	0.5	0.377778	0	0.5	0.181818	0.205128	0.285714	0.111111	0.3	0.545455	0.3	0.166667	0.2	0	0	0.333333	0.311111	0.2	0.333333	0.111111	0.25	0.711538	0.4375	0.269231	0	0.411765	0.4	0.222222	0.125	0.722222	0.1875	0.0909091	0.45	0.3125	0.4	0.288591	0.461538	0.1	0.4	0.25	0.375	0.153846	0.25
2009	28	81	0.363636	0.166667	0	0.0909091	0.25	0.222222	0	0.111111	0.181818	0.384615	0.428571	0.111111	0.2	0.818182	0.3	0	0.4	0	0.714286	0.333333	0.466667	0.1	0.333333	0.777778	0.375	0.461538	0.3125	0.192308	0.333333	0.352941	0.8	0	0.375	0.666667	0.3125	0.0909091	0.45	0.1875	0.28	0.328859	0.384615	0.2	0.35	0	0.425	0	0.25
2009	29	82	0.363636	0.5	0	0.0909091	0.625	0.222222	0.25	0.5	0.0909091	0.205128	0.142857	0.111111	0.3	1.27273	0.1	0	0	0.2	0	0	0.244444	0.4	0.111111	0.277778	0.1875	0.403846	0.1875	0.0769231	0	0.176471	0	0.111111	0.375	0.277778	0.125	0	0.35	0.0625	0.2	0.255034	0.246154	0.3	0.2	0.625	0.225	0.153846	0.1
2009	30	83	0.0909091	0.166667	0	0.0909091	0.5	0.466667	0	0.166667	0	0.0512821	0.142857	0	0.4	0.272727	0.1	0.166667	0.6	0.8	0.142857	0.333333	0.288889	0.3	1	0.555556	0.5625	0.326923	0	0.115385	0	0.176471	0	0.111111	0.375	0.5	0.125	0.181818	0.15	0.125	0.24	0.33557	0.153846	0.3	0.2	0.125	0.325	0.0769231	0.15
2009	31	84	0.363636	0	0	0.181818	0.125	0.244444	0.125	0.277778	0.636364	0.384615	0.142857	0.222222	0.1	0.272727	0.2	0.5	0.2	0	0.571429	0.666667	0.288889	0.3	0.444444	0.222222	0.375	0.480769	0.0625	0.192308	0	0.470588	0	0.444444	0.25	0.388889	0.25	0.181818	0.1	0.1875	0.24	0.333333	0.353846	0.1	0.25	0	0.25	0.0769231	0.25
2009	32	85	0.0909091	0.666667	0	0.181818	0.5	0.333333	0.125	0.388889	0.363636	0.333333	0.428571	0	0.1	0.454545	0.5	0.333333	1.2	0	0	0.333333	0.422222	0	0.222222	0.444444	0.5625	0.365385	0.25	0.269231	0.333333	0.411765	0.6	0.333333	0.375	0.222222	0.0625	0.363636	0.4	0.1875	0.12	0.348993	0.415385	0.1	0.2	0.125	0.5	0.0769231	0.25
2009	33	86	0.363636	0.833333	0	0.0909091	0	0.288889	0	0.222222	0.0909091	0.0769231	0.285714	0.111111	0.4	0.636364	0	0	0.8	0	0.142857	0	0.244444	0.1	0.555556	0.166667	0.0625	0.346154	0.375	0.153846	0	0.176471	0.4	0	0.0625	0.277778	0.125	0.0909091	0	0.4375	0.36	0.187919	0.323077	0.1	0.2	0	0.375	0.0769231	0.05
2009	34	87	0.0909091	0	0.5	0	0.25	0.222222	0	0.222222	0	0.153846	0.285714	0.111111	0.1	0.363636	0.1	0.166667	0	0	0	0	0.0444444	0.1	0.111111	0.111111	0.25	0.25	0.125	0.153846	0	0.235294	0.4	0	0.5625	0	0.125	0.181818	0.05	0.1875	0.04	0.154362	0.153846	0	0.1	0.125	0.1	0.230769	0.25
2009	35	88	0.0909091	0.5	0	0.181818	0.25	0.311111	0.125	0.111111	0.454545	0.0512821	0.285714	0.222222	0.1	0.272727	0	0	0.4	0.4	0.428571	0	0.155556	0.1	0.111111	0.333333	0.25	0.115385	0.1875	0.307692	0	0.117647	0	0.111111	0.0625	0.611111	0.125	0	0.1	0.75	0.16	0.214765	0.230769	0	0.3	0	0.375	0.153846	0.05
2009	36	89	1.09091	0.5	0	0.363636	0.25	0.4	0.111111	0.444444	0.454545	0.564103	0.428571	0.125	0.4	1.18182	0.2	0	0.8	0	0.857143	1.66667	0.288889	0.1	0.777778	0.611111	0.5	0.557692	0.0625	0.115385	0	0.352941	1.2	0	0.5	0.555556	0.1875	0.363636	0.75	0.625	0.72	0.416107	0.261538	0.1	0.75	0.375	0.375	0.461538	0.55
2009	37	90	0.818182	1.33333	0	0.0833333	0.625	0.511111	0.125	0.277778	0.545455	0.487179	0.571429	0.4	0.6	0.272727	0.1	0	1	0.2	0.285714	0.333333	0.222222	0.1	0.555556	0.388889	0.8125	0.769231	0.285714	0.307692	0.333333	0.411765	0.6	0.222222	0.4375	0.388889	0.5	0	0.3	0.75	0.64	0.489933	0.584615	1	0.15	0.5	0.5	0.307692	0.55
2009	38	91	0.272727	1.16667	0	0.0909091	1	0.288889	0.125	0.277778	0.272727	0.230769	0.428571	0.333333	0	0.272727	0.1	0.166667	0.8	0.8	0.285714	0.333333	0.244444	0	0.555556	0.0555556	0.375	0.346154	0.3125	0.346154	0	0.294118	0.4	0.111111	1	0.666667	0.1875	0.272727	0.1	0.5625	0.28	0.355705	0.692308	0.2	0.15	0.375	0.325	0.0769231	0.3
2009	39	92	0.363636	0	0	0.181818	0.125	0.333333	0.125	0.0555556	0.181818	0.263158	0.142857	0.5	0	0.181818	0.1	0.166667	0.2	0.2	0	0.666667	0.2	0.1	0.555556	0.5	0.1875	0.288462	0.25	0.115385	0.333333	0.0588235	0.4	0	0.0625	0.111111	0.0625	0.545455	0.15	0.5	0.64	0.529801	0.353846	0.3	0.681818	0.5	0.375	0.230769	0.15
2009	40	93	0.0909091	1	0	0.272727	0.25	0.444444	0	0.210526	0.272727	0.4	0.428571	0.2	0	0.545455	0	0.166667	0.4	0.6	0.285714	0	0.326087	0	0.222222	0.0555556	0.0625	0.557692	0.5	0.230769	0	0.117647	0	0.222222	0.25	0.277778	0.25	0.636364	0.1	0.4375	0.12	0.395973	0.292308	0	0.238095	0.25	0.425	0.538462	0
2009	41	94	0.272727	0.333333	0	0.181818	0.375	0.377778	0.25	0.611111	0.454545	0.307692	0.428571	0.333333	0	0.454545	0.4	0	0.4	0	0.428571	0.333333	0.311111	0	0.111111	0.277778	0.4375	0.807692	0.75	0.153846	0	0.411765	0.6	0.111111	0.125	0.666667	0.1875	0.181818	0.15	0.5625	0.32	0.503356	0.661538	0.1	0.4	0	0.7	0.0769231	0.2
2009	42	95	0.272727	0.333333	0	0	0	0.511111	0.2	0.5	0	0.409091	0.428571	0.5	0.4	0.272727	0.2	0.166667	0.8	0	0.285714	0.666667	0.222222	0.5	0	0.875	0.5	0.211538	0.6875	0.153846	0.666667	0.235294	0.6	0.214286	0.117647	0.111111	0.375	0	0.4	0.25	0.12	0.36	0.424242	0.2	0.35	0	0.125	0.538462	0.15
2009	43	96	0.0909091	1.14286	0	0.363636	0.625	0.155556	0	0.166667	0.0909091	0.411765	0.428571	0.833333	0	0.272727	0.3	0.166667	0.2	0	0	0	0.4	0	0.571429	0.25	0.1875	0.634615	0.4375	0.153846	0	0.176471	0.2	0	0.375	0.166667	0.0625	0.272727	0.1	0.375	0.08	0.263514	0.234375	0.3	0.1	0	0.6	0.461538	0.3
2009	44	97	0.272727	0.166667	0	0.181818	0.125	0.217391	0.375	0.0555556	0	0.0769231	0.285714	0.111111	0	0.181818	0.3	0.166667	0.8	0	0	0.333333	0.173913	0	0.111111	0.333333	0.5	0.423077	0.125	0.0384615	0.333333	0.294118	0.2	0.111111	0.25	0.111111	0.25	0.272727	0.4	0.125	0.2	0.154362	0.153846	0.1	0	0	0.25	0	0.5
2009	45	98	0.636364	0.666667	0	0.272727	0.875	0.6	0.25	0.210526	0.454545	0.589744	0.714286	0.333333	0.4	0.636364	0	0.166667	2	0	0.142857	0.333333	0.288889	0.2	0.666667	0.611111	1	0.865385	0.75	0.461538	0	0.235294	0.2	0	0.3125	1.16667	0	0.545455	0.2	0.375	0.6	0.610738	0.553846	0.6	0.9	1.375	0.775	0.230769	0.35
2009	46	99	0.636364	0.285714	0	0.454545	0.5	0.755556	0.5	0.722222	0.727273	0.820513	1.28571	0.111111	0.7	1.09091	0.3	0.166667	1.4	1	0.285714	0.666667	0.733333	0.6	0.555556	0.666667	0.125	1	0.4375	0.692308	0.666667	0.235294	0.4	0.444444	0.5625	0.833333	0.75	1.18182	0.35	0.875	0.6	0.838926	0.784615	1.1	0.9	1	0.975	0.769231	0.35
2009	47	100	1.27273	0.833333	1	0.272727	0.5	0.755556	0	0.444444	1.18182	0.487179	0.428571	0	1.2	1	0.7	0.666667	0.8	0.2	1.28571	0.333333	0.422222	0.4	1.44444	0.777778	1.0625	0.942308	0.5625	0.384615	0	0.588235	0.6	0.666667	0.6875	0.111111	0.5	0.818182	0.75	0.3125	0.8	0.959732	0.676923	1.2	0.4	0.625	0.75	0.538462	0.7
2009	48	101	0.545455	1	0	1.36364	0.75	0.844444	0.375	0.388889	0.363636	0.575	0.571429	0.222222	0.6	1	0.1	0.666667	0.2	0.2	1.14286	0.333333	0.333333	0.6	0.666667	0.277778	0.8125	0.961538	0.6875	0.384615	1	0.588235	0.4	0.111111	0.75	0.388889	0.3125	0.545455	0.5	0.625	0.6	0.724832	0.6	0.7	0.45	0.625	0.925	0.615385	0.7
2009	49	102	0.363636	0.666667	0	0.0909091	0	0.4	0.375	0.222222	0.454545	0.342105	0.285714	0.222222	0.3	0.818182	0.2	0.833333	0	0.6	0	0	0.333333	0.2	0.666667	0.5	0.0625	0.90566	0.1875	0.692308	0.333333	0.235294	0.2	0.111111	0.4375	0.111111	0.5625	0.230769	0.25	0.3125	0.52	0.426667	0.446154	0.1	0.25	0.25	0.45	0.0769231	0.2
2009	50	103	1.18182	1.33333	0	0.727273	0.5	0.577778	0.125	0.111111	0.363636	0.475	0.714286	0.444444	0.2	0.181818	0.3	0.166667	0.4	0.2	0.428571	0.333333	0.577778	0.5	1.33333	0.388889	0.5625	0.634615	0.5	0.307692	0	0.352941	0.8	0.666667	0.5	0.222222	0.3125	0.363636	0.45	0.8125	0.84	0.489933	0.461538	0.8	0.7	0.5	0.425	0.153846	0.15
2009	51	104	0.909091	0.333333	0	0.272727	0	0.288889	0	0	1	0.487179	0.142857	1	0.2	0.181818	0.4	0.166667	0.8	0	0.285714	0	0.266667	0.6	0.777778	0.333333	0.625	0.5	0.5	0.153846	2.33333	0.117647	0.4	0.5	0.5625	0.833333	0.6875	0.0909091	0.35	0.5	0.88	0.375839	0.415385	0	0.3	1.125	0.282051	0.153846	0.9
2009	52	105	0.363636	1	0	0.181818	0.625	0.488889	0.5	0.388889	0.181818	0.282051	0.142857	0.555556	0.25	0.363636	0.333333	0.333333	0.6	0	0.428571	0	0.577778	0.3	0.555556	0.666667	0.0625	0.961538	0.25	0.0769231	0.666667	0.117647	0.8	0	0.5	0.5	1.4375	0.727273	0.35	0.4375	0.4	0.510067	0.569231	0.3	0.15	0.25	0.375	0.692308	0.95
2010	1	106	0.571429	1	0	0.727273	0.375	0.533333	0	0.111111	0.454545	0.692308	0	0.555556	0.3	0.818182	0.1	0.333333	1.6	0.6	0.285714	2.33333	0.466667	0.6	1.11111	0.333333	0.3125	0.692308	0.8125	0.269231	1.33333	0.294118	0.4	0.888889	0.625	0.388889	0.9375	0.545455	0.65	0.25	0.68	0.744966	0.492308	0.4	0.7	1.25	0.525	0.692308	0.5
2010	2	107	1.42857	1.5	0	1	1	0.755556	0.125	0.611111	0.454545	0.666667	0.285714	1.22222	0.6	1.72727	1.2	0.333333	0.8	1.6	0.714286	2.66667	1.04444	0.8	1.66667	1.22222	1.375	1.55769	0.625	0.653846	2.33333	0.235294	1.8	1.5	1.3125	0.833333	1.1875	1.18182	0.5	0.5625	0.68	0.986577	0.676923	0.4	1.4	2	1.07692	1.30769	1.55
2010	3	108	1	1.33333	0	0.545455	0.5	0.822222	0.75	1.38889	0.727273	0.897436	0.857143	0.222222	0.8	0.454545	0.9	0.333333	1	0.6	0.285714	2.33333	1	0.6	1.44444	0.944444	0.625	2.03846	1.0625	0.807692	1.33333	0.882353	0.8	0.75	1.4375	1	0.75	1.27273	0.75	0.4375	0.76	0.885906	0.892308	0.6	0.7	2.125	0.925	1.84615	2.05
2010	4	109	0.571429	0.833333	0	0.454545	0.5	0.755556	0	0.5	1.18182	1.05128	1.14286	1	0.2	0.909091	1	0.5	0.8	0.2	0.857143	1.33333	0.511111	0.6	1.11111	0.777778	1.6875	1.69231	0.1875	0.923077	0.666667	0.352941	2.4	0.666667	1	0.944444	1.0625	0.727273	0.75	0.625	0.4	0.899329	1.2	0.1	0.7	1	1.1	1	1.45
2010	5	110	0.285714	0.333333	0	0.454545	0	0.444444	0.25	0.222222	0.545455	0.974359	0.142857	1.66667	0.4	0.545455	0.4	0.166667	0.4	0	0.142857	0.666667	0.888889	0.4	1.11111	0.555556	0.8125	1.53846	0.375	0.346154	0.666667	0.470588	1.2	1.22222	1.3125	0.777778	1.125	0.727273	0.9	0.3125	0.6	0.57047	0.769231	0.6	0.9	1.25	1.075	0.923077	0.75
2010	6	111	0.428571	1	0	0.454545	0.875	0.466667	0.25	0.277778	1.36364	0.846154	0.714286	0.777778	0.1	0.727273	0.4	0.333333	0.4	0.8	0.857143	2.33333	0.777778	0.8	1.22222	0.722222	0.75	1	0.8125	0.461538	0.666667	0.352941	0.2	0.666667	0.875	0.666667	0.75	0.454545	1.05	0.125	0.32	0.557047	0.861538	0.2	1.05	0.125	1.025	1	0.95
2010	7	112	0.714286	1	0	0.545455	1	0.555556	0.5	0.277778	0.545455	0.435897	0.428571	0.444444	0.3	0	0.6	0.333333	0.4	0	0.714286	0	0.577778	0.2	0.888889	0.388889	0.25	1.07692	0.4375	0.730769	0	0.0588235	0.4	0.555556	0.875	0.333333	0.375	0.636364	0.85	0.5625	0.4	0.469799	0.569231	0	0.35	1.375	0.55	0.461538	0.85
2010	8	113	0.714286	0	0	0.0909091	0.25	0.333333	0	0.277778	0.181818	0.307692	0.285714	0.555556	0.5	0.0909091	0.1	0	0	0.2	0.285714	0.333333	0.555556	0.2	0.111111	0.444444	0.5625	0.576923	0.4375	0.346154	1	0.588235	0	0.615385	0.1875	0.722222	0.1875	0.181818	0.7	0.5	0.05	0.489933	0.523077	0	0.65	1.125	0.394737	0.461538	0.7
2010	9	114	0.428571	0.5	0	0	0.375	0.133333	0.428571	0.388889	0.363636	0.461538	0.571429	0.111111	0.2	0.0909091	0.1	0	0.6	0	0.285714	1	0.511111	0.2	0.333333	0.444444	0.5625	0.711538	0.375	0.423077	0.333333	0.294118	0.2	1.2	0.4375	0.333333	0.3125	0.545455	0.4	0.375	0.08	0.308725	0.523077	0.7	0.3	0.375	0.625	0.307692	0.2
2010	10	115	0.285714	0.666667	0	0	0.125	0.288889	0.25	0.111111	0	0.282051	0.142857	0.222222	0.2	0.272727	0.4	0.166667	0.4	0.8	0	0	0.333333	0	0.111111	0.222222	0.1875	0.25	0.3125	0.115385	0	0.0588235	0.8	0.333333	0.0625	0.333333	0.75	0.0909091	0.05	0.125	0.04	0.275168	0.369231	0	0.35	0.5	0.15	0.153846	0.15
2010	11	116	0.857143	0.666667	0	0.545455	0.5	0.422222	0.125	0.555556	0.727273	0.74359	0.428571	0.444444	0.4	0.545455	0.3	0	1	0.4	0.428571	0	0.555556	0.3	1.22222	1.11111	1.0625	1	0.5625	0.884615	2.33333	0.352941	1	1.22222	0.8125	0.666667	1.6875	1.27273	0.4	0.6875	0.36	0.536913	0.769231	0.4	1.1	0.25	0.575	1.30769	1.05
2010	12	117	1.57143	0.833333	0	0.636364	0.625	0.688889	0.875	0.444444	1	0.666667	1	0.333333	1.2	0.636364	0	0.166667	0.2	0.8	0.428571	0.333333	0.8	0.5	1.11111	0.666667	0.6875	1.30769	1	0.692308	6.33333	0.647059	0.6	1	1.4375	1.27778	1.1875	1.45455	0.85	0.25	0.4	0.550336	0.784615	0.7	1.35	0.875	0.85	1.76923	1.05
2010	13	118	0.428571	0.5	0	0.909091	0.5	0.6	0	0.166667	0.272727	0.846154	0.142857	0.333333	0.4	0.272727	0.9	0.166667	0.4	0.4	1	0.666667	0.644444	0.3	1.66667	0.555556	0.375	1.21154	0.6875	0.538462	0.666667	0.647059	1.6	0.444444	1	1.11111	0.75	0.636364	0.95	1	0.36	0.510067	0.553846	0.4	0.85	1.25	0.525	0.846154	0.7
2010	14	119	0.285714	0.5	0	0.272727	0.625	0.4	0.125	0.222222	0.363636	0.230769	1.14286	0.222222	0.8	1.09091	0.3	0	0.4	1	0.571429	1.33333	0.577778	0.3	0.444444	0.888889	0.25	0.480769	0.8125	0.384615	0	0.352941	0.6	0.2	0.25	0.555556	0.25	0.545455	0.4	0.3125	0.44	0.344595	0.723077	0.2	0.65	0.125	0.5	1	0.6
2010	15	120	0.571429	1.33333	0	0.181818	1.125	0.822222	0.75	0.222222	0.636364	0.74359	0.714286	0.222222	0.3	0.363636	0.2	0	0.6	1	0	0.666667	0.444444	0.2	0.333333	0.222222	0.375	0.634615	0.5	0.461538	0.666667	0.117647	0.6	0.25	0.625	1.22222	0.5	0.454545	0.55	0.75	0.36	0.550336	0.538462	0.5	0.75	1	0.6	0.615385	0.6
2010	16	121	0.428571	0.5	0	0.272727	0.125	0.311111	0.625	0.0555556	0.363636	0.769231	0.571429	0.111111	0.6	0.363636	0.6	0	0.4	0.2	0.571429	0	0.511111	0.4	0.888889	0.555556	1.125	0.461538	0.625	0.807692	1.33333	0.647059	0.4	0.333333	0.6875	0.944444	0.4375	0.181818	0.65	0.375	0.56	0.449664	0.615385	0.3	1	0.5	0.325	0.846154	0.3
2010	17	122	2.42857	0.833333	0	0.818182	0.875	0.577778	1	0.333333	0.909091	0.846154	1	1	0.9	0.636364	0.5	0	0.6	1	0.428571	0.666667	0.822222	0.2	1.33333	0.722222	1.0625	0.711538	1.25	0.461538	4.66667	0.411765	0.4	1.22222	0.625	1.27778	0.5625	1.63636	0.95	0.5625	0.44	0.711409	0.846154	0.8	1.5	0.625	1.225	0.692308	1
2010	18	123	1.28571	0.833333	0	0.909091	0.875	0.466667	0.5	0.388889	1.36364	0.512821	0.428571	0.777778	0.5	0.454545	0.6	0.5	0.4	0	0.428571	0	0.6	0.5	0.555556	1.11111	1	0.634615	0.75	0.615385	4.33333	0.235294	0.6	0.444444	0.625	0.833333	0.6875	0.636364	0.25	0.25	0.28	0.52349	0.984615	0.3	0.8	1.25	1.05	0.538462	0.45
2010	19	124	1.57143	0.5	0	0.272727	0.375	0.488889	0.375	0.444444	0.636364	0.538462	0.285714	0.555556	0.3	0.545455	0.2	0.333333	0.4	0.4	0.285714	0.666667	0.444444	0.1	0.777778	0.5	0.625	0.615385	0.4375	0.230769	3	0.588235	0.4	0.111111	0.4375	1.16667	0.5625	0.909091	0.2	0.4375	0.28	0.395973	0.630769	0.7	0.7	0.5	0.7	0.307692	0.5
2010	20	125	1.85714	0.833333	0	0.909091	0.75	0.333333	0.5	0.5	0.818182	0.948718	0.285714	0.666667	0.4	0.0909091	0.4	0.666667	0.2	0.6	1	1.66667	0.688889	0.4	0.333333	0.833333	0.5	0.807692	1.0625	0.5	1.33333	0.176471	1	1	0.8125	0.777778	0.875	0.727273	0.5	0.625	0.32	0.644295	0.846154	0.5	0.95	1.125	0.75	0.769231	0.5
2010	21	126	0.857143	0.166667	0	0.818182	1.625	0.422222	0.75	0.333333	0.181818	0.230769	0.142857	0.444444	0.4	0	0	0.5	0.2	0.2	0.285714	0	0.466667	0.2	0.111111	0.5	0.25	0.480769	0.25	0.384615	1.66667	0.529412	0.2	0.25	0	0.666667	0.5	0.636364	0.5	0.125	0.12	0.436242	0.523077	0.1	0.5	0.5	0.275	0.307692	0.5
2010	22	127	1.28571	0.166667	0	0.181818	0.375	0.355556	0.125	0.444444	0.363636	0.384615	0.714286	0.555556	0.8	0.545455	0.2	0.166667	0.2	0	0.142857	0	0.266667	0.3	0.222222	0.222222	0.4375	0.5	0.375	0.192308	2	0.176471	0.4	0.222222	0.25	0.888889	0.625	0.909091	0.25	0.1875	0.44	0.422819	0.492308	0	0.65	0.375	0.275	0.384615	0.5
2010	23	128	0.857143	0.5	0	0.454545	0.125	0.155556	0.125	0.111111	0.272727	0.307692	0	0.333333	0.6	0.727273	0.7	0	0.4	0.6	0	0.666667	0.355556	0.7	0.666667	0.0555556	0.4375	0.307692	0.375	0.346154	1.33333	0.0588235	0.4	0.222222	0.1875	0.5	0.3125	0.727273	0.7	0.25	0.2	0.395973	0.338462	0	0.45	0.125	0.475	0.0769231	0.3
2010	24	129	1.14286	0.166667	0	0.454545	0.375	0.444444	0.25	0.388889	0.272727	0.692308	0.571429	0	0.7	0.454545	0.1	0.166667	0.2	0.4	0	0.666667	0.6	0.2	0.111111	0.277778	0.4375	0.557692	0.625	0.653846	1.33333	0	0	0.7	0.1875	0.666667	0.1875	0.454545	0.6	0.25	0.64	0.47651	0.569231	0.5	0.75	0.25	0.55	0.692308	0.85
2010	25	130	0.285714	0.5	0	0.0909091	0.625	0.444444	0.222222	0.222222	0.0909091	0.307692	0.142857	0	0.5	0.545455	0.3	0.166667	0.4	0.2	0.285714	0.333333	0.288889	0.3	1	0.647059	0.4	0.480769	0.466667	0.538462	0.333333	0.235294	0	0.272727	0.1875	0.666667	0.333333	0.909091	1.05	0.5625	0.12	0.47651	0.784615	0.1	0.65	0.375	0.425	1.46154	0.75
2010	26	131	0.142857	0.5	0.5	0.272727	0.5	0.377778	0.142857	0.111111	0.0909091	0.538462	0	0.333333	0.7	0.727273	0.3	0.5	0.4	0.4	0.714286	0.333333	0.2	0.333333	0.444444	0.5	0.5625	0.365385	0.4375	0.192308	0	0.294118	0.4	0.333333	0.375	0.166667	0.375	0.363636	0.3	0.375	0.12	0.416107	0.369231	0.4	0.35	0.375	0.35	0.461538	0.65
2010	27	132	1.14286	0.333333	0	0.0909091	0.125	0.0888889	0.125	0	0.909091	0.230769	0.285714	0	0.4	0.363636	0	0	0.2	0.2	0.285714	0	0.288889	0.2	0	0.166667	0.3125	0.326923	0.125	0.153846	0.666667	0.0588235	0	0.111111	0.125	0.222222	0.0625	0.363636	0.2	0.1875	0	0.174497	0.215385	0	0.3	0.5	0.125	0.0769231	0.25
2010	28	133	0.285714	0.166667	0	0.0909091	0.125	0.177778	0.125	0.0555556	0.181818	0.35	0.428571	0.222222	0.1	0.181818	0.1	0	0	0	0.142857	0	0.155556	0.2	0.555556	0.222222	0.125	0.192308	0.25	0.269231	0.333333	0.0588235	0	0	0.3125	0.444444	0.125	0.272727	0.2	0.3125	0.28	0.14094	0.123077	0.3	0.35	0.125	0.15	0.230769	0.1
2010	29	134	0.428571	0.166667	0	0.181818	0.25	0.434783	0.125	0.277778	0.272727	0.25641	0.428571	0.222222	0.9	1.27273	0.1	0.333333	0.2	0.6	0.142857	0	0.266667	0.6	0.222222	0.555556	0	0.326923	0.1875	0.115385	0.333333	0.117647	0.2	0	0.25	0.833333	0.0625	0.272727	0.3	0.4375	0.04	0.33557	0.323077	0.1	0.25	0	0.25	0.153846	0.4
2010	30	135	0.285714	0	0.5	0.272727	0.125	0.311111	0.5	0.111111	0.818182	0.512821	0.142857	0.111111	0.5	0.363636	0.1	0.333333	0.2	1	0.285714	0	0.355556	0.3	0.444444	0.222222	0.75	0.557692	0.4375	0.346154	3.33333	0.117647	0.4	0.222222	0.25	0.833333	0.125	0.0909091	0.25	0.6875	0.4	0.409396	0.430769	0.3	0.8	0.625	0.375	0.230769	0.3
2010	31	136	1.14286	0	0.5	0.272727	0.125	0.4	0	0.222222	0.454545	0.538462	0.142857	0.222222	0.1	0.636364	0.1	0.166667	0.2	1.2	0.714286	0.333333	0.333333	0.2	0.555556	0.555556	0.8125	0.5	0.625	0.346154	2.33333	0.176471	0.4	0.444444	0.4375	0.611111	0.375	0.181818	0.35	0.3125	0.32	0.295302	0.4	0.5	0.95	0.25	0.375	0.538462	0.2
2010	32	137	0.428571	1.5	1	0	0.375	0.666667	0.25	0.111111	0.181818	0.769231	0.571429	0.777778	1.3	0.454545	0.2	0.666667	1.4	0.2	0.142857	0.666667	0.444444	0.7	0.111111	0.277778	0.3125	0.634615	1.125	0.615385	1.33333	0.176471	1.4	0.333333	1.0625	0.833333	0.25	0.363636	0.25	0.5	0.44	0.557047	0.707692	0.3	0.9	1.25	0.575	0.769231	0.7
2010	33	138	0.428571	1.33333	0	0	0.375	0.288889	0.125	0.277778	0.363636	0.794872	0.142857	0	0.2	0.454545	0	0.333333	0.4	0.2	0.142857	0.666667	0.333333	0.1	0.333333	0.444444	0.5625	0.307692	0.375	0.307692	1.33333	0.117647	0.8	0.111111	0.4375	0.666667	0.5625	0.0909091	0.2	0.4375	0.28	0.33557	0.446154	0.6	0.6	0.125	0.35	0.461538	0.25
2010	34	139	1	0.166667	0	0	0.375	0.311111	0.125	0.333333	0.272727	0.307692	0.857143	0.444444	0.2	0.545455	0	0.166667	0.4	0.2	0.285714	0.333333	0.266667	0.4	0.111111	0.555556	0.4375	0.326923	0.25	0.153846	0	0.176471	0	0.444444	0.25	0.388889	0	0.636364	0.65	0.4375	0.2	0.328859	0.369231	0.6	0.75	0.375	0.2	0.307692	0.2
2010	35	140	0.428571	1.16667	0	0.181818	0.125	0.2	0.25	0.388889	0.727273	0.564103	0.571429	0.777778	0.1	0.454545	0.2	0.333333	0.2	0	0.428571	0.333333	0.422222	0.5	0.111111	0.222222	0.6875	0.288462	0.375	0.230769	0.666667	0.235294	0.2	0.333333	0.375	0.5	0.0625	0.545455	0.25	0.1875	0.12	0.315436	0.338462	0.4	0.6	0.375	0.5	0.307692	0.6
2010	36	141	2.28571	0.166667	0	0.0909091	0.25	0.2	0.25	0.222222	0.181818	0.333333	0.571429	0.666667	0.777778	0.272727	0.2	1	0.8	0.8	0	0.333333	0.333333	0.3	0.222222	0.166667	0.125	0.461538	0.3125	0.0769231	0	0.0588235	1	0.333333	0.25	0.111111	0.25	0.0909091	0.65	0.5625	0.08	0.328859	0.446154	0.3	0.4	0.125	0.325	0.692308	0.2
2010	37	142	0	0.5	0	0.181818	0.125	0.244444	0.375	0.0555556	0	0.358974	0.142857	0.333333	0.1	0.0909091	0.2	0	0	0.8	0.285714	0	0.377778	0.3	0.111111	0.111111	1.125	0.442308	0.25	0.115385	1.66667	0.176471	0.2	0.222222	0.1875	0.111111	0.3125	0.363636	0.4	0.25	0.32	0.255034	0.153846	0.1	0.35	0.375	0.125	0.230769	0.3
2010	38	143	0.285714	0.666667	0	0.181818	0.5	0.2	0.125	0.222222	0	0.384615	0.428571	0.333333	0.3	0	0	0.5	0	0.6	0.285714	0	0.288889	0.5	0	0.277778	0.4375	0.519231	0.625	0.384615	1.33333	0.0588235	0.4	0	0.25	0.5	0.25	0.545455	0.45	0.4375	0.16	0.322148	0.338462	0.3	0.2	0.75	0.125	0.153846	0.45
2010	39	144	0.714286	0.833333	0	0.454545	1.25	0.355556	0.125	0.166667	0.636364	0.282051	0.142857	0.111111	0.6	0.636364	0	0.166667	0.4	0.2	0.714286	0	0.266667	0.4	0.333333	0.388889	0.5	0.615385	0.1875	0.192308	1.33333	0.294118	0	0.222222	0.0625	0.5	0.3125	0.636364	1	0.4	0.16	0.577181	0.584615	0.1	0.6	0.125	0.55	0.769231	0.5
2010	40	145	0.285714	0.833333	0	0.0909091	0.75	0.4	0.125	0.111111	0.363636	0.153846	0.571429	0	0	0.363636	0.3	0.5	0	0.2	0.428571	1.66667	0.2	0.4	1	0.444444	0.6875	0.538462	0.3125	0.04	0.333333	0.352941	0.4	0.125	0.4375	0.277778	0.4375	0.272727	0.75	0.3125	0.08	0.38255	0.553846	0	0.45	0.75	0.35	1	0.2
2010	41	146	1.28571	1.5	0	0	0.625	0.466667	0.25	0.277778	0.272727	0.589744	0.428571	0.222222	0.1	0.818182	0.1	0.166667	0	0.4	0.142857	1	0.155556	0.3	0.222222	0.944444	1.1875	0.557692	0.5	0.346154	0.333333	0.529412	0.2	0.444444	0.375	0.444444	0.25	0.181818	0.15	0.375	0.12	0.33557	0.476923	0.5	0.45	0.125	0.3	0.769231	0.25
2010	42	147	0.571429	0.833333	0	0.363636	0.125	0.155556	0.125	0.277778	0.727273	0.282051	0	0.555556	0.6	0.0909091	0.4	0.166667	0.8	1	0	0	0.266667	0.5	0.111111	0.333333	0.3125	0.576923	0.1875	0.230769	0.666667	0.0588235	0.4	0.222222	0.25	0.0555556	0	0	0.25	0.3125	0.28	0.214765	0.338462	0.5	0.35	0	0.125	0.230769	0.15
2010	43	148	0.571429	1.5	0	0.454545	0.25	0.377778	0.25	0.333333	0.181818	0.538462	1	0.111111	0	0	0.1	0	0.6	0.4	0.142857	1	0.288889	0.2	0.444444	0.777778	0.75	0.538462	0.4375	0.423077	2	0.235294	1	0.555556	0.3125	0.666667	0.1875	0.454545	0.2	0.125	0.04	0.395973	0.4	0.5	0.6	0.375	0.2	0.538462	0.6
2010	44	149	0.285714	0.666667	0.5	0.181818	0.25	0.177778	0.125	0.0555556	0.181818	0.25641	0	0.222222	0	0.363636	0.1	0	0.2	0.2	0.285714	0.666667	0.422222	0	0.111111	0.555556	0.5	0.25	0.1875	0.0384615	0.333333	0.235294	0.8	0	0.125	0.333333	0.1875	0.181818	0.1	0.375	0.12	0.261745	0.415385	0.4	0.3	0.375	0.35	0.384615	0.15
2010	45	150	0.428571	0	0	0.181818	0.75	0.2	0.375	0	0	0.128205	0.714286	0	0.3	0.0909091	0.1	0.166667	0	0	0.142857	1	0.177778	0.1	0	0.0555556	0.3125	0.173077	0.1875	0.346154	0.333333	0.117647	0.8	0	0.125	0.222222	0.125	0.181818	0	0.0625	0.04	0.168919	0.169231	0.1	0.15	0	0.2	0.384615	0.3
2010	46	151	0	0.166667	0	0.0909091	0	0.244444	0.111111	0	0.0909091	0.15	0	0	0	0.0909091	0.1	0	0	0.2	0.285714	0	0.266667	0.2	0.555556	0.277778	0.4375	0.288462	0.25	0.192308	1.33333	0.176471	0.2	0.153846	0.125	0.277778	0.125	0.136364	0.3	0.25	0.2	0.175676	0.230769	0	0.45	0.375	0.075	0.538462	0.3
2010	47	152	0	0.166667	1	0	0.125	0.4	0.571429	0.0555556	0.181818	0.315789	0	0.555556	0	0.636364	0	0	0	0.2	0.142857	0	0.133333	0	0.111111	0.5	0.1875	0.423077	0.875	0.192308	0	0.352941	0	0.6	0.375	0.444444	0.125	0.0909091	0.35	0.3125	0.16	0.194631	0.584615	0.8	0.35	0.25	0.175	0.0769231	0.1
2010	48	153	0	0.666667	1.5	0.181818	0.625	0.533333	0.125	0.611111	0	0.230769	0.571429	0.333333	0.6	0	0.3	0.166667	0.4	0.2	0.285714	1.66667	0.577778	0.8	0	0.722222	0.6875	0.423077	0.5625	0.153846	1.33333	0.411765	0	0.625	0.4375	0.222222	0.3125	0.272727	0.5	0.5625	0.36	0.38255	0.461538	0.4	1.05	0.125	0.55	1	0.45
2010	49	154	0.714286	2.83333	0	0.363636	2.375	1.77778	1.5	1.33333	1	1.25641	1	1.55556	0.7	1.27273	1.2	2.5	0.8	0.6	0.428571	1.33333	0.955556	1.3	1.11111	1.88889	1.375	1.53846	1.25	1.07692	0	0.823529	1.2	2.1	1.25	1.27778	0.9375	1.45455	0.789474	0.9375	0.6	1.36913	1.41538	0.6	1.1	1.625	1.075	2.46154	2.2
2010	50	155	0.857143	2.5	0	1.36364	1	1.37778	0.75	1.11111	0.636364	1.02564	0.857143	0.666667	0.8	1.18182	1.6	0	0.6	0.2	0.571429	1	1.13333	0.2	1.88889	1.72222	0.9375	1.76923	2.625	0.846154	2.33333	0.764706	0.8	1.14286	1.8125	1	0.8125	0.909091	1.45	1.0625	0.56	1.16779	1.27692	1.3	1.8	0.625	1.45	2	1.5
2010	51	156	2.28571	2.66667	1	1.09091	1.375	0.688889	0.375	0.555556	1.27273	1.10256	1.28571	0.555556	0.1	1.54545	0.2	0	0.4	1	0.571429	1	1.04444	0.8	1.66667	1.61111	1.125	1.30769	1.0625	1.03846	2.66667	0.647059	1.6	2.33333	1	0.944444	0.5	1.63636	0.45	0.625	0.76	0.738255	0.892308	1.3	1	2.75	0.975	1.69231	1
2010	52	157	1.42857	0	0	0.909091	1.125	0.256098	0	0.266667	0.272727	0.442308	0.7	0.428571	0.368421	0.6875	0.4	0	0.333333	0.25	0.2	0.5	0.622222	0.4	0.181818	0.333333	1.5625	0.25	0.6	0.369565	0.5	0.1	0.833333	0	0.5	0.5	0.40625	1.27273	0.5	0.4	0.58	0.510067	0.644444	0.111111	1.12	1.5	0.25	0.7	0.5
2011	1	158	0.571429	0.833333	0.5	0.727273	1	0.422222	0.625	0.222222	0	0.589744	1	0.222222	0.5	0.181818	0.1	0	0.2	0.4	0	0	0.333333	0.4	0.333333	0.166667	0.3125	0.576923	0.4375	0.115385	0	0.0625	0	0	0	0.0555556	0.3125	0.909091	0.4	0.125	0.4	0.281879	0.523077	0.222222	0.2	0.25	0.15	0.2	0.3
2011	2	159	0.857143	0.833333	5	1.27273	2.5	0.711111	0.125	0.722222	1	0.794872	0.285714	0.777778	1.2	0.272727	0.6	0.666667	1	0.6	0.142857	0	0.822222	1.1	0.333333	0.333333	0.625	1.13462	1	0.769231	0	0.625	1.4	0.222222	0.0625	0.611111	0.5	1.18182	1.7	0.25	0.8	0.543624	0.892308	0.555556	0.4	0.125	0.3	1.2	1
2011	3	160	0.285714	0.833333	3.5	2.90909	1.625	0.644444	0.75	0.722222	0.545455	1	0.714286	1.11111	0.8	0.727273	0.2	0.166667	0.2	0.2	0.571429	0.666667	0.844444	0.7	0.444444	0.555556	0.4375	0.538462	1.1875	1.07692	0	0	0.6	1	0.4375	0.555556	0.125	1.54545	1.45	0.5625	0.56	0.57047	1.26154	0.666667	0.8	1	0.85	0.6	0.8
2011	4	161	0.142857	0.333333	1.5	0.636364	1.375	0.488889	0.375	0.388889	0.636364	0.666667	0.142857	0.777778	0.3	0.545455	0.1	0.333333	1.6	0	0.142857	0	0.488889	1	0.444444	0.5	0.5	0.641509	0.8125	0.615385	0	0.5625	0.2	0.777778	0.25	0.222222	0.1875	1	1.05	0.125	0.32	0.543624	0.830769	0.222222	0.65	3	0.475	1.26667	0.25
2011	5	162	0.428571	0.666667	2	3.63636	2.375	0.911111	1.25	1.05556	0.545455	0.692308	0	1.22222	1.1	2	1.7	0.5	0.8	1.6	0.571429	1	0.755556	1	1.11111	0.722222	1.0625	1.21154	1.0625	0.923077	0	0.625	2.6	1.22222	0.25	0.611111	0.25	1.72727	1.75	0.5	1	0.85906	1.53846	0.777778	0.35	3	0.325	1.4	0.7
2011	6	163	0.857143	1.5	1.5	3	2.125	0.866667	1	0.944444	0.818182	0.948718	0.571429	0.222222	1.2	0.818182	1.9	1	0.6	0.6	0.428571	1	0.933333	0.7	1.22222	0.333333	1.0625	0.923077	0.8125	1.07692	0	0.125	0.6	1	0.25	1	0.25	1.09091	1.55	0.8125	1.28	0.939597	1.36923	0.555556	0.7	2.75	0.75	1.2	0.7
2011	7	164	1.28571	1.66667	3	2.54545	2.75	0.755556	0.625	0.611111	0.909091	0.820513	0.428571	1.11111	1.1	0.363636	0.8	0.833333	0.2	0	0.285714	0	0.977778	0.2	0.333333	0.388889	0.4375	0.673077	1.1875	0.538462	1	0.3125	1	0.444444	0.4375	0.5	0.1875	1.36364	1.45	0.25	0.68	0.798658	1.26154	0.333333	0.6	1.875	0.6	1	0.45
2011	8	165	0.714286	1.5	1	1.45455	1	0.363636	0.125	0.388889	0.545455	0.512821	0	1	0.7	0.454545	0	0.5	0.2	0	0.142857	0.333333	0.488889	0.4	0.222222	0.5	0.5	0.576923	1.3125	0.230769	0.333333	0.0625	0.4	0.555556	0.1875	0.666667	0.3125	1.09091	0.95	0.0625	0.84	0.415584	0.630769	0	0.65	0.5	0.5	0.733333	0.4
2011	9	166	1.14286	1.16667	3	1.54545	1.875	0.777778	0.75	0.388889	0.454545	0.538462	0.285714	0.333333	0.7	0.272727	0.4	0.5	0.4	0	0.285714	0	0.444444	0.2	0.555556	0.277778	0.3125	0.730769	0.3125	0.615385	0.333333	0.125	1.2	0.666667	0.3125	0.611111	0.25	0.272727	0.6	0.125	0.84	0.77027	0.738462	1	0.9	1	0.375	0.466667	0.1
2011	10	167	0.285714	0.5	1	0.909091	0.25	0.488889	0.125	0.611111	0.181818	0.230769	0.142857	0.666667	0.8	0.272727	0.5	0.333333	0.2	0.6	0	0.666667	0.377778	0.3	0.888889	0.111111	0.0625	0.519231	0.5	0.384615	0	0.25	0.6	1	0.125	0.666667	0.375	0.909091	0.35	0.375	0.64	0.302013	0.553846	1.44444	0.3	0.75	0.525	0.866667	0.35
2011	11	168	0.285714	0.333333	1	0.363636	0	0.244444	0	0.277778	0	0.333333	0	0.222222	0.3	0.181818	0.2	0.166667	0	0	0	0.333333	0.244444	0.2	0.555556	0.0555556	0.3125	0.134615	0.25	0.0769231	0	0.0625	0.2	0.222222	0.0625	0.166667	0.0625	0.181818	0.2	0.0625	0.16	0.14094	0.215385	0.444444	0.3	0.875	0.075	0.333333	0.2
2011	12	169	0.428571	0.666667	2.5	1.27273	1.5	0.266667	0.375	0.388889	0	0.564103	0.142857	0.222222	0.4	0	0.6	0	0.2	0.2	0.142857	0	0.466667	0.1	0.888889	0.222222	0.125	0.5	0.25	0.576923	1	0.0625	0.8	0.222222	0.3125	0.444444	0.1875	1.27273	0.3	0.125	0.48	0.328859	0.492308	0.444444	0.25	1.625	0.225	0.4	0.3
2011	13	170	0.428571	1.6	5.5	3.81818	0.75	1.51111	1.25	0.944444	0.272727	1.25641	0.285714	0.333333	1.5	0.727273	0.9	1.33333	1	2.2	0	2.33333	0.577778	1.5	1.66667	0.944444	0.625	1.01923	0.625	0.730769	0.333333	0.6875	0.4	0.888889	0.5	1.88889	0.25	0.636364	0.85	0.5625	0.8	0.778523	1.56923	1.88889	1.05	0.875	0.5	0.533333	0.6
2011	14	171	0.428571	0.666667	2.5	1.90909	1.625	1.02222	1.125	0.722222	1.45455	0.948718	0	0.333333	0.5	0.636364	0.7	1.83333	2	0.2	0.571429	0.333333	0.688889	0.7	1.11111	0.833333	0.5625	0.788462	0.5	0.5	0	0.25	1	0.555556	0.0625	1	0.375	1.90909	1.7	0.5	0.32	0.818792	1.13846	0.444444	0.7	1	0.4	0.6	0.6
2011	15	172	0.571429	0.833333	4	1.18182	0.75	1.33333	0.5	0.333333	0.545455	0.692308	2.57143	0.111111	0.9	1.54545	0.5	0.5	0.4	1	0.142857	0.333333	0.688889	0.7	0.666667	0.277778	0.1875	0.653846	0.6875	0.846154	0	0.3125	0.4	0.777778	0.125	1.61111	0.125	1.09091	1.05	0.1875	0.36	0.456376	0.676923	0.777778	0.55	2.125	0.35	0.733333	0.7
2011	16	173	0.142857	0.333333	3.5	2.18182	1.5	1.13333	0.25	1	0.454545	0.923077	0.571429	0.444444	1.3	0.909091	1	1.33333	0.6	0.6	0.285714	1.33333	0.688889	1.4	1	0.777778	0.1875	1.03846	0.8125	0.961538	0.666667	0.3125	0.8	0.777778	0.1875	1.38889	0.25	1.09091	1.55	0.25	0.64	0.612245	1.04615	0.666667	0.25	2.375	0.65	0.533333	0.55
2011	17	174	1.28571	1.33333	4	1.90909	0.5	0.577778	0	0.277778	0.909091	0.538462	1	0.666667	0.7	0.0909091	0.8	0.833333	0.8	0.2	0.428571	0.333333	0.466667	0.9	0.333333	0.222222	0	0.461538	0.75	0.653846	0	0.125	0.4	0.666667	0.3125	0.833333	0.625	0.909091	0.6	0.3125	0.36	0.483221	0.938462	0.555556	0.4	0.75	0.4	0.466667	0.55
2011	18	175	0.428571	0.5	1.5	0.818182	0.428571	0.311111	0.5	0.166667	0.545455	0.333333	0.857143	0.777778	0.2	0.636364	0.6	0.5	0	0.2	0	0	0.533333	0.1	1.25	0.333333	0.0625	0.538462	0.3125	0.423077	0	0.25	0.2	0.285714	0.125	0.277778	0.3125	1.63636	0.4	0.125	0.12	0.308725	0.538462	0.111111	0.25	0.75	0.275	0.133333	0.15
2011	19	176	0.714286	0.333333	3.5	1.18182	0.875	0.6	0.125	0.166667	0.363636	0.641026	0.285714	0.555556	0.8	0.727273	0.7	1.16667	0.4	0.2	0	0.333333	0.555556	0.6	0.666667	0.277778	0.1875	0.519231	0.5625	0.461538	0	0.0625	0	1.11111	0.125	0.666667	0.4375	1.45455	1.15	0.25	0.2	0.469799	0.630769	0.666667	0.65	1.5	0.225	0.8	0.3
2011	20	177	0.571429	0.166667	6.5	2.54545	1.25	0.777778	0.375	0.166667	0.363636	0.461538	0.142857	0.111111	0.7	0.454545	0.4	0.833333	0.2	0	0.285714	1	0.622222	0.8	0.111111	0.277778	0.0625	0.519231	0.625	0.384615	0	0.125	0.8	0.375	0.4375	0.777778	0.625	1	0.65	0.1875	0.24	0.422819	0.6	0.666667	0.2	2.125	0.3	0.466667	0.6
2011	21	178	0.571429	0.166667	4	1.09091	0.625	0.422222	0	0.444444	0.272727	0.205128	0.428571	0.111111	0.1	0.272727	0.5	0.166667	0.2	0.4	0.142857	0	0.333333	0.3	0.333333	0.277778	0	0.230769	0.1875	0.230769	0	0.0625	0	0.333333	0.0625	0.666667	0.125	0.818182	0.4	0.125	0.24	0.174497	0.138462	0.333333	0.1	0.375	0.225	0.133333	0.15
2011	22	179	0	0	0	1.18182	0.25	0.355556	0	0.111111	0.272727	0.205128	0.285714	0.333333	0.4	0	0.4	0.333333	0.4	0	0	0	0.222222	0.7	0.111111	0.0555556	0.125	0.288462	0.4375	0.269231	0	0.1875	0.8	0.111111	0.0625	0.111111	0.0625	0.363636	0.2	0	0.16	0.181208	0.384615	0.222222	0.1	0.5	0.075	0.533333	0.05
2011	23	180	1	0.666667	1.5	1.72727	0.25	0.311111	0.375	0.444444	0.272727	0.179487	0.285714	0.111111	0.2	0.181818	0.2	0	0	0.2	0.571429	0	0.2	0.1	0.222222	0.166667	0	0.326923	0.4375	0.115385	0	0.125	0.4	0.555556	0.0625	0.166667	0.3125	0.181818	0.5	0	0.24	0.154362	0.307692	0.111111	0.15	0.25	0.325	0.2	0.1
2011	24	181	0.571429	0.166667	0.5	1.09091	1	0.222222	0.25	0.111111	0	0.230769	0	0	0.6	0.181818	0.1	0	0.4	0	0.285714	0	0.155556	0.1	0.222222	0.111111	0.25	0.288462	0.3125	0.0769231	0.333333	0	0.2	0.444444	0.1875	0.111111	0.25	0.272727	0.75	0.0625	0.24	0.288591	0.353846	0.444444	0.15	0.625	0.325	0.333333	0.15
2011	25	182	0.428571	0.5	0	0.454545	0.5	0.377778	0	0.222222	0	0.102564	0.428571	0.666667	0.5	0	0.7	0	0.2	0	0.142857	0	0.2	0.2	0.222222	0.0555556	0.125	0.346154	0.4375	0.153846	0	0.0625	0.4	0.444444	0.125	0.222222	0.1875	0.363636	0.25	0	0.32	0.194631	0.184615	0.111111	0.2	0.875	0.25	0.733333	0.05
2011	26	183	0.285714	0.666667	1.5	0.454545	0.875	0.288889	0.375	0.166667	0.0909091	0.153846	0	0.222222	0.3	0.0909091	0.2	0.166667	0.2	0	0.142857	0	0.222222	0.1	0	0.0555556	0	0.153846	0.375	0.230769	0	0.0625	0.2	0.111111	0	0.166667	0.1875	0.363636	0.2	0.0625	0.28	0.161074	0.384615	0	0.15	0.25	0.05	0.266667	0.15
2011	27	184	0.142857	0.333333	2.5	0.454545	0	0.244444	0.125	0.944444	0.181818	0.205128	0	1.22222	0.3	0.0909091	0.4	0	0.4	0	0.285714	0.333333	0.222222	0.3	0.111111	0.277778	0	0.326923	0.3125	0.461538	0	0	0.4	0.222222	0.125	0.333333	0.3125	0.454545	0.35	0.0625	0.08	0.181208	0.2	0.333333	0.2	0.25	0.225	0.4	0.05
2011	28	185	1.14286	0.666667	0.5	0.636364	1.125	0.288889	0.125	0.166667	0.272727	0.0512821	0.142857	0.375	0.5	0.0909091	0.4	0.166667	0	0	0.142857	0.333333	0.155556	0.222222	0.111111	0	0.125	0.173077	0.25	0.269231	0	0.0625	0	0.333333	0.0625	0.277778	0.25	0.636364	0.35	0.1875	0.16	0.187919	0.169231	0.111111	0.2	0.375	0.205128	0.133333	0.1
2011	29	186	0.285714	0.333333	2	0.909091	0.375	0.177778	0.125	0.111111	0.545455	0.128205	0.285714	0.777778	0.4	0.181818	0.3	0.333333	0	0.2	0.142857	0.333333	0.333333	0.2	0.222222	0.166667	0.0625	0.0769231	0.25	0.423077	0.333333	0.125	0.6	0.111111	0.0625	0.222222	0.3125	0.272727	0.25	0.125	0.16	0.14094	0.215385	0.333333	0.1	0.625	0.15	0.133333	0.05
2011	30	187	0.285714	0.166667	0	0.454545	0.375	0.244444	0.375	0.333333	0	0.230769	0.285714	1.125	0	0.181818	0.1	0	0.2	0	0.142857	0.333333	0.186047	0	0.111111	0.111111	0.1875	0.192308	0.25	0.115385	0	0.0625	0	0.222222	0	0.388889	0.25	0.272727	0.25	0.125	0.12	0.0872483	0.153846	0	0.05	0.125	0.2	0.133333	0.1
2011	31	188	1.14286	0.166667	4.5	0.454545	0.375	0.177778	0.25	0.166667	0.454545	0.230769	0.857143	1	0.6	0.272727	1	0	0.2	0	0.285714	0	0.311111	0.1	0.333333	0.166667	0.125	0.25	0.375	0.461538	0	0.0625	0.6	0.111111	0.0625	0.222222	0.1875	0.363636	0.4	0.0625	0.2	0.214765	0.307692	0.111111	0.15	0.5	0.075	0.133333	0.05
2011	32	189	1.14286	0.666667	1.5	0.363636	0.5	0.2	0	0.111111	0.181818	0.307692	0.285714	0.555556	0.4	0.181818	0.7	0.166667	0	0	0	0	0.222222	0.1	0	0.166667	0	0.134615	0.25	0.307692	0.333333	0.0666667	0.2	0.111111	0.3125	0.222222	0.2	0.636364	0.3	0	0.08	0.174497	0.707692	0	0.1	0.285714	0.15	0.4	0.15
2011	33	190	0.285714	0.333333	0.5	0.636364	0.375	0.133333	0.625	0.333333	0.0909091	0.461538	0.285714	0.888889	0.4	0.454545	0.4	0.5	0	0	0	0	0.155556	0.9	0	0.277778	0.125	0.365385	0.4375	0.307692	0	0.125	0.6	0.333333	0.3125	0.166667	0.25	0.545455	0.3	0.3125	0.08	0.100671	0.369231	0	0.15	0.25	0.2	0.357143	0.1
2011	34	191	0.142857	0.5	3	0.909091	0.5	0.355556	0.125	0.333333	0.454545	0.153846	0.571429	0.222222	0.6	0.363636	0.4	0.5	0	0	0.142857	0.333333	0.2	0.5	0	0.444444	0.25	0.461538	0.375	0.115385	0	0.25	0	0	0.125	0.333333	0.1875	0.272727	0.45	0.5625	0.28	0.228188	0.461538	0.222222	0.25	0.625	0.05	0.266667	0.2
2011	35	192	0.714286	0.833333	1.5	0.454545	1.375	0.2	0	0.0555556	0.272727	0.282051	0.285714	0.111111	0.2	0.0909091	0.2	0	0.2	0	0	0	0.111111	0.5	0	0.166667	0	0.192308	0.571429	0.230769	0.333333	0.0625	0.2	0.222222	0	0.222222	0.125	0.545455	0.45	0	0.52	0.0604027	0.307692	0	0.3	0.625	0.475	0.4	0.05
2011	36	193	0.142857	0.166667	0.5	0.454545	0.25	0.111111	0	0.277778	0.0909091	0.333333	0.285714	0	0.2	0	0.3	0.333333	0	0	0.285714	0	0.155556	0.4	0.111111	0.222222	0.0625	0.153846	0.3125	0.153846	0	0.25	0	0.333333	0.0625	0.444444	0.25	0.181818	0.55	0	0.08	0.0878378	0.4	0	0.4	0.125	0.25	0.0666667	0.15
2011	37	194	0.285714	0.166667	3.5	0.0909091	0	0.340909	0.25	0.166667	0.454545	0.205128	0.142857	0.222222	0.4	0.181818	0.5	0.5	0.4	0	0.142857	0.333333	0.2	0.1	0.111111	0.0555556	0.25	0.294118	1.05882	0.230769	0	0	0.2	0.111111	0.0625	0.166667	0	0.181818	0.35	0.25	0.12	0.14	0.230769	0	0.3	0.375	0.121951	0.4	0.15
2011	38	195	0.714286	0	2	0.363636	0.5	0.311111	0	0	0	0.435897	0	0	0.1	0.0909091	0.5	0.166667	0	0	0.142857	0	0.111111	0.3	0	0.277778	0.0625	0.423077	0.3125	0.0769231	0	0.0625	0	0.111111	0.125	0.222222	0	0.636364	0.4	0	0.12	0.0671141	0.461538	0.111111	0.05	0.25	0.175	0.333333	0.05
2011	39	196	0.714286	0	1	0.272727	0.625	0.0888889	0.125	0.277778	0.0909091	0.25641	0.142857	0.222222	0.2	0.545455	0	0.5	0.4	0	0.428571	0.333333	0.177778	0.1	0.333333	0.166667	0.0625	0.115385	0.0625	0.115385	0	0	0	0.333333	0.0625	0.111111	0.0625	0.272727	0.421053	0.0625	0.08	0.107383	0.138462	0.222222	0.15	0.25	0.025	0.0666667	0.2
2011	40	197	0.428571	0.166667	1	0.181818	0	0.222222	0.25	0.166667	0.0909091	0.461538	0	0.555556	0.2	0.363636	0.2	0	0.2	0	0	0.666667	0.0666667	0.2	0	0.222222	0	0.384615	0.5	0.153846	0	0.0625	0.4	0	0.25	0.0555556	0.0625	0.363636	0.05	0.0625	0	0.0604027	0.338462	0	0.15	0.25	0.2	0.333333	0.25
2011	41	198	0.428571	0.333333	0	0.272727	0.625	0.0222222	0.125	0.166667	0	0.205128	0	0	0.1	0.0909091	0.2	0	0	0.2	0	0	0.0666667	0.2	0.111111	0.0555556	0.0625	0.173077	0.125	0.153846	0	0.0625	0	0.111111	0.125	0.222222	0.125	0.454545	0.15	0.0625	0.16	0.14094	0.138462	0	0.25	0	0.05	0.6	0.05
2011	42	199	0.285714	0.166667	0.5	0	0	0.111111	0	0.333333	0.181818	0.410256	0.142857	0.333333	0.1	0	0.5	0	0	0	0	0	0.0888889	0.666667	0.111111	0.111111	0.0625	0.192308	0.2	0.153846	0	0	0.2	0	0.0625	0	0.0625	0	0.388889	0	0.08	0.0805369	0.323077	0	0.05	0.125	0.025641	0.333333	0.35
2011	43	200	0.714286	0	0	0.272727	0.625	0.222222	0	0.0588235	0.0909091	0.333333	0.285714	0.444444	0.666667	0.181818	0.3	0.166667	0	0	0	0	0.2	0.166667	0.333333	0.111111	0	0.173077	0.0625	0.16	0	0.0625	0.2	0.555556	0	0.222222	0.0625	0.0909091	0	0	0.28	0.134228	0.369231	0.111111	0.1	0.375	0.05	0.4	0.15
2011	44	201	0.428571	0.333333	1.5	1.27273	0.5	0.311111	0.375	0.388889	1	0.435897	0.285714	0.222222	1.3	0.363636	0.5	0.166667	1	0.2	0.285714	0	0.477273	0	0.333333	0.333333	0	0.596154	0.25	0.153846	0	0.1875	0.4	0.333333	0.125	0.277778	0.1875	0.454545	0.75	0.0625	0.12	0.161074	0.630769	0.111111	0	0	0.205128	0.866667	0.15
2011	45	202	1.28571	0.666667	4	0.636364	0.625	0.6	0.625	0.352941	0.363636	0.410256	0.428571	0.777778	0.5	0.181818	0.888889	1.16667	0.2	0.4	0.166667	2.66667	0.204545	1.5	0.444444	0.277778	0.25	0.538462	0.4375	0.346154	0	0	0.8	0.888889	0.1875	0.333333	0.333333	0.636364	0.631579	0	0.36	0.315436	0.553846	0	0.25	0.125	0.05	0.2	0.526316
2011	46	203	1.85714	0.5	2	1.09091	1.125	0.533333	0.375	0.5	0.363636	0.641026	0	0.444444	1.2	0.0909091	1.2	1	0	0.2	0.285714	2.66667	0.244444	1.3	0	0.722222	0	0.884615	0.9375	0.192308	0	0	0.2	0.666667	0.125	0.388889	0.5	0.545455	0.3	0.1875	0.24	0.295302	0.8	0	0.55	0.5	0.2	0.8	0.3
2011	47	204	0.142857	1.16667	0	0.363636	0.625	0.311111	0.125	0.166667	0.181818	0.435897	0	0.666667	0.5	0.363636	0.8	0.333333	0.4	0	0	0	0.244444	0.166667	0.333333	0.222222	0.125	0.288462	0	0.0384615	0	0.0625	0.4	0	0.125	0	0	0.545455	0.55	0.0625	0.12	0.14094	0.276923	0.111111	0.15	0.125	0.2	0.2	0.15
2011	48	205	0.142857	0	1.5	0.272727	0.125	0.133333	0.125	0.111111	0	0.25641	0.142857	0.111111	0.4	0.272727	0.2	0.2	0	0	0	0	0.0666667	0.2	0.555556	0.111111	0.0625	0.288462	0.125	0.0769231	0	0.0625	0	0.444444	0.125	0	0.0625	0	0.2	0.1875	0.2	0.107383	0.2	0	0.05	0	0.05	0.266667	0.1
2011	49	206	0.142857	0.333333	0	0.0909091	0.5	0.177778	0	0.333333	0	0.307692	0.428571	0.333333	0.2	0.181818	0.4	0.166667	0	0	0.285714	0	0.0888889	0.5	0.222222	0.0555556	0.0625	0.269231	0.125	0.153846	0	0.0625	0.2	0	0.0625	0	0.125	0.0909091	0.3	0.0625	0.08	0.147651	0.0615385	0	0.05	0.125	0.1	0.733333	0.15
2011	50	207	0.285714	0.166667	0.5	0.454545	0.125	0.377778	0.25	0.0555556	0.181818	0.307692	0	0.222222	0.9	0.272727	0.4	0.5	0.4	0.6	0	0.333333	0.133333	0.3	0.111111	0.222222	0.0625	0.326923	0.125	0.384615	0	0	0	0.333333	0.25	0.333333	0.1875	0.454545	0.1	0	0.24	0.154362	0.323077	0.111111	0	0.125	0.2	0.8	0
2011	51	208	0.285714	0.8	2.5	1.27273	1.5	0.555556	0.25	0.111111	0.363636	0.897436	0.571429	1.22222	0.6	0.909091	0.2	0.666667	0.2	0	0.714286	0.666667	0.622222	1.4	0.666667	0.764706	0.5625	0.788462	0.9375	0.346154	0.333333	0.25	1.4	0.555556	0.125	0.611111	0.6	1.27273	1.45	0.1875	0.4	0.317568	0.507692	0.333333	0.15	0.25	0.225	1.93333	0.4
2011	52	209	2.57143	1.83333	7	1.45455	4	0.75	1.375	0.611111	0.545455	0.923077	1.71429	1.66667	0.5	2.45455	1.3	2.16667	0.8	0	0	0.333333	1.2	3	1.44444	0.666667	0.5	1.21154	1.9375	0.307692	0.333333	0.5625	1.8	0.333333	0.4375	1.44444	0.5625	0.909091	2.3	0.4375	0.84	0.590604	1.27692	1	0.3	0.375	0.625	1.73333	0.5
[truncated: 30 more columns]

## Sheet: TrapsWeek
Year	Week	Time	Andorinhas	Antonio.Honorio	juncao1	BarroVermelho	juncao2	BentoFerreira	BoaVista	Bonfim	Caratoira	Centro	Condusa	Conquista	Consolacao	Cruzamento	daPenha	deLourdes	doCabral	doMoscoso	doQuadro	Engenharia	EnseadadoSua	Estrelinha	FonteGrande	ForteSaoJoao	Fradinhos	Goiabeiras	GrandeVitoria	Gurigica	Horto	IlhaBela	IlhadaFumaca	IlhadasCaieiras	IlhadeMonteBelo	IlhadeSantaMaria	IlhadoFrade	IlhadoPrincipe	Inhangueta	Itarare	JaboureAeroporto	JardimCamburi	JardimdaPenha	JesusdeNazareth	JoanaDArc	Jucutuquara	MariaOrtiz	MarioCipreste	Maruipe
2008	1	1	7	6	2	11	8	45	8	17	10	39	7	9	10	11	9	6	5	5	7	3	44	9	9	18	16	52	15	26	3	17	5	9	16	18	16	11	19	16	24	142	65	10	20	8	39	8	17
2008	2	2	7	6	2	11	8	45	8	17	9	41	7	10	10	11	9	6	5	5	7	3	43	7	9	18	16	52	15	25	3	17	5	10	16	18	16	11	20	16	23	137	64	10	20	8	36	0	13
2008	3	3	7	6	2	11	8	45	7	17	11	37	7	8	10	11	9	6	5	5	7	3	45	10	9	18	16	52	16	26	3	17	5	4	16	18	16	11	19	16	25	146	65	10	20	8	40	12	19
2008	4	4	7	6	2	11	7	45	9	18	11	39	7	9	10	11	9	6	5	5	7	3	45	10	9	18	16	52	15	26	3	17	5	12	16	18	16	11	18	16	25	142	65	9	20	8	40	13	20
2008	5	5	7	6	1	11	8	45	8	18	9	41	7	10	10	11	10	6	5	5	7	3	45	10	9	18	16	52	14	24	3	17	5	11	16	18	16	11	20	16	23	141	65	10	20	8	40	13	18
2008	6	6	7	6	2	11	8	45	8	17	11	37	7	9	10	11	10	6	5	5	7	3	45	4	9	18	16	52	15	23	3	17	5	7	16	18	16	11	20	16	25	145	65	10	20	8	40	13	20
2008	7	7	7	6	2	11	8	45	7	18	11	38	7	9	10	11	10	6	5	5	7	3	45	9	9	18	16	52	16	25	3	17	5	6	16	18	16	11	20	16	25	144	61	10	20	8	40	13	20
2008	8	8	7	6	2	11	8	45	8	18	11	39	7	9	10	11	10	6	5	5	7	3	45	10	9	18	16	52	16	26	3	17	5	9	16	18	16	11	20	16	25	149	65	10	20	8	40	13	20
2008	9	9	7	6	2	11	8	45	8	18	11	39	7	9	10	11	10	6	5	5	7	3	45	10	9	18	16	52	16	26	3	17	5	9	16	18	16	11	20	16	25	149	65	10	20	8	40	13	20
2008	10	10	7	6	2	11	8	45	8	18	11	39	7	9	10	11	10	6	5	5	7	3	45	10	9	18	16	52	16	26	3	17	5	9	16	18	16	11	20	16	25	149	65	10	20	8	40	13	20
2008	11	11	7	6	2	11	8	45	8	18	11	39	7	9	10	11	10	6	5	5	7	3	45	10	9	18	16	52	16	26	3	17	5	9	16	18	16	11	20	16	25	149	65	10	20	8	40	13	20
2008	12	12	7	6	2	11	8	45	8	18	11	39	7	9	10	11	10	6	5	5	7	3	45	10	9	18	16	52	16	26	3	17	5	9	16	18	16	11	20	16	25	149	65	10	20	8	40	13	20
2008	13	13	7	6	2	11	8	45	8	18	11	39	7	9	10	11	10	6	5	5	7	3	45	10	9	18	16	52	16	26	3	17	5	9	16	18	16	11	20	16	25	149	65	10	20	8	40	13	20
2008	14	14	7	6	2	11	8	45	8	18	11	39	7	9	10	11	10	6	5	5	7	3	45	10	9	18	16	52	16	26	3	17	5	9	16	18	16	11	20	16	25	149	65	10	20	8	40	13	20
2008	15	15	7	6	2	11	8	45	8	18	11	39	7	9	10	11	10	6	5	5	7	3	45	10	9	18	16	52	16	26	3	17	5	9	16	18	16	11	20	16	25	149	65	10	20	8	40	13	20
2008	16	16	7	6	2	11	8	45	8	18	11	39	7	9	10	11	10	6	5	5	7	3	45	10	9	18	16	52	16	26	3	17	5	9	16	18	16	11	20	16	25	149	65	10	20	8	40	13	20
2008	17	17	7	6	2	11	8	45	8	18	11	39	7	9	10	11	10	6	5	5	7	3	45	10	9	18	16	52	16	26	3	17	5	9	16	18	16	11	20	16	25	149	65	10	20	8	40	13	20
2008	18	18	7	6	2	11	8	45	8	18	11	39	7	9	10	11	10	6	5	5	7	3	45	10	9	18	16	52	16	26	3	17	5	9	16	18	16	11	20	16	25	149	65	10	20	8	40	13	20
2008	19	19	7	6	2	11	8	45	8	18	11	39	7	9	10	11	10	6	5	5	7	3	45	10	9	18	16	52	16	26	3	17	5	9	16	18	16	11	20	16	25	149	65	10	20	8	40	13	20
2008	20	20	7	6	2	11	8	45	8	18	11	39	7	9	10	11	10	6	5	5	7	3	45	10	9	18	16	52	16	26	3	17	5	9	16	18	16	11	20	16	25	149	65	10	20	8	40	13	20
2008	21	21	7	6	2	11	8	45	8	18	11	39	7	9	10	11	10	6	5	5	7	3	45	10	9	18	16	52	16	26	3	17	5	9	16	18	16	11	20	16	25	149	65	10	20	8	40	13	20
2008	22	22	7	6	2	11	8	45	8	18	11	39	7	9	10	11	10	6	5	5	7	3	45	10	9	18	16	52	16	26	3	17	5	9	16	18	16	11	20	16	25	149	65	10	20	8	40	13	20
2008	23	23	7	6	2	11	8	45	8	18	11	39	7	9	10	11	10	6	5	5	7	3	45	10	9	18	16	52	16	26	3	17	5	9	16	18	16	11	20	16	25	149	65	10	20	8	40	13	20
2008	24	24	7	6	2	11	8	45	8	18	11	39	7	9	10	11	10	6	5	5	7	3	45	10	9	18	16	52	16	26	3	17	5	9	16	18	16	11	20	16	25	149	65	10	20	8	40	13	20
2008	25	25	7	6	2	11	8	45	8	18	11	39	7	9	10	11	10	6	5	5	7	3	45	10	9	18	16	52	16	26	3	17	5	9	16	18	16	11	20	16	25	149	65	10	20	8	40	13	20
2008	26	26	7	6	2	11	8	45	8	18	11	39	7	9	10	11	10	6	5	5	7	3	45	10	9	18	16	52	16	26	3	17	5	9	16	18	16	11	20	16	25	149	65	10	20	8	40	13	20
2008	27	27	7	6	2	11	8	45	8	18	11	39	7	9	10	11	10	6	5	5	7	3	45	10	9	18	16	52	16	26	3	17	5	9	16	18	16	11	20	16	25	149	65	10	20	8	40	13	20
2008	28	28	7	6	2	11	8	45	8	18	11	39	7	9	10	11	10	6	5	5	7	3	45	10	9	18	16	52	16	26	3	17	5	9	16	18	16	11	20	16	25	149	65	10	20	8	40	13	20
2008	29	29	7	6	2	11	8	45	8	18	11	39	7	9	10	11	10	6	5	5	7	3	45	10	9	18	16	52	16	26	3	17	5	9	16	18	16	11	20	16	25	149	65	10	20	8	40	13	20
2008	30	30	7	6	2	11	8	45	8	18	11	39	7	9	10	11	10	6	5	5	7	3	45	10	9	18	16	52	16	26	3	17	5	9	16	18	16	11	20	16	25	149	65	10	20	8	40	13	20
2008	31	31	7	6	2	11	8	45	8	18	11	39	7	9	10	11	10	6	5	5	7	3	45	10	9	18	16	52	16	26	3	17	5	9	16	18	16	11	20	16	25	149	65	10	20	8	40	13	20
2008	32	32	7	6	2	11	8	45	8	18	11	39	7	9	10	11	10	6	5	5	7	3	45	10	9	18	16	52	16	26	3	17	5	9	16	18	16	11	20	16	25	149	65	10	20	8	40	13	20
2008	33	33	7	6	2	11	8	45	8	18	11	39	7	9	10	11	10	6	5	5	7	3	45	10	9	18	16	52	16	26	3	17	5	9	16	18	16	11	20	16	25	149	65	10	20	8	40	13	20
2008	34	34	7	6	2	11	8	45	8	18	11	39	7	9	10	11	10	6	5	5	7	3	45	10	9	18	16	52	16	26	3	17	5	9	16	18	16	11	20	16	25	149	65	10	20	8	40	13	20
2008	35	35	7	6	2	11	8	45	8	18	11	39	7	9	10	11	10	6	5	5	7	3	45	10	9	18	16	52	16	26	3	17	5	9	16	18	16	11	20	16	25	149	65	10	20	8	40	13	20
2008	36	36	7	6	2	11	8	45	7	18	11	40	7	9	10	11	10	6	5	5	7	3	45	10	9	18	16	52	16	26	3	17	5	9	16	18	16	11	20	16	25	149	65	10	20	8	40	13	20
2008	37	37	7	6	2	11	8	45	8	18	11	38	7	9	10	11	10	6	5	5	7	3	45	10	9	18	16	52	16	26	3	17	5	9	16	18	16	11	20	16	25	149	65	10	20	8	40	13	20
2008	38	38	7	6	2	11	8	45	8	18	11	39	7	9	10	11	10	6	5	5	7	3	45	10	9	18	16	52	16	26	3	17	5	9	16	18	16	11	20	16	25	149	65	10	20	8	40	13	20
2008	39	39	7	6	2	11	8	45	8	18	11	39	7	9	10	11	10	6	5	5	7	3	45	10	9	18	16	52	16	26	3	17	5	9	16	18	16	11	20	16	25	149	65	10	20	8	40	13	20
2008	40	40	7	6	2	11	8	45	8	18	11	39	7	9	10	11	10	6	5	5	7	3	45	10	9	18	16	52	16	26	3	17	5	9	16	18	16	11	20	16	25	149	65	10	20	8	40	13	20
2008	41	41	7	6	2	11	8	45	8	18	11	39	7	9	10	11	10	6	5	5	7	3	45	10	9	18	16	52	16	26	3	17	5	9	16	18	16	11	20	16	25	149	65	10	20	8	40	13	20
2008	42	42	7	6	2	11	8	45	8	18	11	39	7	9	10	11	10	6	5	5	7	3	45	10	9	18	16	52	16	26	3	17	5	9	16	18	16	11	20	16	25	149	65	10	20	8	40	13	20
2008	43	43	7	6	2	11	8	45	8	18	11	39	7	9	10	11	10	6	5	5	7	3	45	10	9	18	16	52	16	26	3	17	5	9	16	18	16	11	20	16	25	149	65	10	20	8	40	13	20
2008	44	44	7	6	2	11	8	45	8	18	11	39	7	9	10	11	10	6	5	5	7	3	45	10	9	18	16	52	16	26	3	17	5	9	16	18	16	11	20	16	25	149	65	10	20	8	40	13	20
2008	45	45	7	6	2	11	8	45	8	18	11	39	7	9	10	11	10	6	5	5	7	3	45	10	9	18	16	52	16	26	3	17	5	9	16	18	16	11	20	16	25	149	65	10	20	8	40	13	20
2008	46	46	7	6	2	11	8	45	8	18	11	39	7	9	10	11	10	6	5	5	7	3	45	10	9	18	16	52	16	26	3	17	5	9	16	18	16	11	20	16	25	149	65	10	20	8	40	13	20
2008	47	47	7	6	2	11	8	45	8	18	11	39	7	9	10	11	10	6	5	5	7	3	45	10	9	18	16	52	16	26	3	17	5	9	16	18	16	11	20	16	25	149	65	10	20	8	40	13	20
2008	48	48	7	6	2	11	8	45	8	18	11	39	7	9	10	11	10	6	5	5	7	3	45	10	9	18	16	52	16	26	3	17	5	9	16	18	16	11	20	16	25	149	65	10	20	8	40	13	20
2008	49	49	7	6	2	11	8	45	8	18	11	39	7	9	10	11	10	6	5	5	7	3	45	10	9	18	16	52	16	26	3	17	5	9	16	18	16	11	20	16	25	149	65	10	20	8	40	13	20
2008	50	50	7	6	2	11	8	45	8	18	11	39	7	9	10	11	10	6	5	5	7	3	45	10	9	18	16	52	16	26	3	17	5	9	16	18	16	11	20	16	25	149	65	10	20	8	40	13	20
2008	51	51	7	6	2	11	8	45	8	18	11	39	7	9	10	11	10	6	5	5	7	3	45	10	9	18	16	52	16	26	3	17	5	9	16	18	16	11	20	16	25	149	65	10	20	8	40	13	20
2008	52	52	7	6	2	11	8	45	8	18	11	39	7	8	10	11	10	6	5	5	7	3	45	10	9	18	16	52	16	26	3	17	5	9	16	18	16	11	20	16	25	149	65	10	20	8	40	13	20
2008	53	53	7	6	2	11	8	45	8	18	11	39	7	10	10	11	11	6	5	5	7	3	45	10	9	18	16	52	16	26	3	17	5	9	16	18	16	11	20	16	25	149	65	10	20	8	40	13	20
2009	1	54	11	6	2	11	8	45	8	18	11	39	7	9	10	11	10	6	5	5	7	3		10	9	18	16	52	16	26	3	17	5	9	16	18	16	11	20	16	25	149	65	10	20	8	40	13	20
2009	2	55	11	6	2	11	8	45	8	18	11	39	7	9	10	11	10	6	5	5	7	3	45	10	9	18	16	52	16	26	3	17	5	9	16	18	16	11	20	16	25	149	65	10	20	8	41	13	20
2009	3	56	11	6	2	11	8	45	8	18	11	39	7	9	10	11	10	6	5	5	7	3	45	10	9	18	16	52	16	26	3	17	5	9	16	18	16	11	20	16	25	149	65	10	20	8	40	13	20
2009	4	57	11	6	2	11	8	45	8	18	11	39	7	9	10	11	10	6	5	5	7	3	45	10	9	18	16	52	16	26	3	17	5	9	16	18	16	11	20	16	25	149	65	10	20	8	40	13	20
2009	5	58	11	6	2	11	8	45	8	18	11	39	7	9	10	11	10	6	5	5	7	3	45	10	9	18	16	52	16	26	3	17	5	9	16	18	16	11	20	16	25	149	65	10	20	8	40	13	20
2009	6	59	11	6	2	11	8	45	8	18	11	39	7	9	10	11	10	6	5	5	7	3	45	10	9	18	16	52	16	26	3	17	5	9	16	18	16	11	20	16	25	149	65	10	20	8	40	13	20
2009	7	60	11	6	2	11	8	45	8	18	11	39	7	9	10	11	10	6	5	5	7	3	45	10	9	18	16	52	16	26	3	17	5	9	16	18	16	11	20	16	25	149	65	10	20	8	40	13	20
2009	8	61	11	6	2	11	8	45	8	18	11	39	7	9	10	11	10	6	5	5	7	3	45	10	9	18	16	52	16	26	3	17	5	9	16	18	16	11	20	16	25	149	65	10	20	8	40	13	20
2009	9	62	11	6	2	11	8	45	8	18	11	39	7	9	10	11	10	6	5	5	7	3	45	10	9	18	16	52	16	26	3	17	5	9	16	18	16	11	20	16	25	149	65	10	20	8	40	13	20
2009	10	63	11	6	2	11	8	45	8	18	11	39	7	9	10	11	10	6	5	5	7	3	45	10	9	18	16	52	16	26	3	17	5	9	16	18	16	11	20	16	25	149	65	10	20	8	40	13	20
2009	11	64	11	6	2	12	8	45	8	18	11	39	7	8	10	11	10	6	5	5	7	3	45	10	9	18	16	52	16	26	3	17	5	9	16	18	16	11	20	16	25	150	65	10	20	8	40	13	20
2009	12	65	11	6	2	11	8	45	8	18	11	39	7	9	10	11	10	6	5	5	7	3	45	10	9	18	16	52	16	26	3	17	5	9	16	18	16	11	20	16	25	150	65	10	20	8	40	13	20
2009	13	66	11	6	2	12	8	45	8	18	13	38	7	10	10	11	10	6	5	5	7	3	45	10	9	18	16	53	16	26	3	17	6	9	16	18	16	11	20	16	25	150	65	10	20	8	40	13	20
2009	14	67	11	6	2	11	8	46	8	18	12	37	8	9	10	14	10	6	10	5	11	3	45	10	9	20	16	57	16	26	3	18	5	8	16	19	16	11	20	16	25	152	68	12	21	8	40	14	21
2009	15	68	11	6	2	11	8	45	9	18	11	47	10	9	13	11	10	6	5	5	7	3	46	10	9	19	16	52	16	26	3	17	5	10	16	18	16	11	20	16	25	149	67	11	21	8	39	14	21
2009	16	69	11	6	2	11	8	45	8	17	11	40	7	9	10	11	10	6	5	5	7	3	45	10	9	18	16	52	16	26	3	17	5	9	16	18	16	13	20	16	25	149	68	10	20	8	40	13	20
2009	17	70	11	6	2	11	8	45	8	18	11	40	7	10	10	11	10	6	4	5	7	3	45	10	9	18	16	52	16	26	3	17	5	9	16	18	16	11	20	16	25	149	66	10	20	8	40	12	20
2009	18	71	11	6	2	11	8	45	8	18	11	38	7	9	10	11	10	6	5	5	7	3	45	10	9	18	16	52	16	26	3	17	5	9	16	18	16	11	20	16	25	149	65	10	20	8	40	13	20
2009	19	72	11	6	2	11	8	45	8	18	11	39	7	9	10	11	10	6	5	5	7	3	45	10	9	18	16	52	16	26	3	17	5	9	16	18	16	11	20	16	25	149	65	10	20	8	40	13	20
2009	20	73	11	6	2	11	8	45	8	18	11	39	7	9	10	11	10	6	5	5	7	3	45	10	9	18	16	52	16	26	3	17	5	9	16	18	16	11	20	16	25	150	65	10	20	8	40	13	20
2009	21	74	11	6	2	11	8	45	8	18	11	39	7	9	10	11	10	6	5	5	7	3	45	10	9	18	16	52	16	26	3	17	5	9	16	18	16	11	20	16	25	149	65	10	20	8	40	13	20
2009	22	75	11	6	2	11	8	45	8	18	11	39	7	8	10	12	10	6	5	5	7	3	45	10	9	18	16	52	16	26	3	17	5	9	16	18	16	11	20	16	25	149	65	10	20	9	41	13	20
2009	23	76	11	6	2	11	8	45	8	18	11	39	7	10	10	11	10	6	5	5	7	3	45	10	9	18	16	52	16	26	3	17	5	9	16	18	16	11	20	16	25	149	65	10	20	9	40	13	20
2009	24	77	11	6	2	11	8	45	8	18	11	39	7	9	10	11	10	6	5	5	7	3	45	10	9	18	15	52	16	26	3	17	5	9	16	18	16	11	20	16	25	149	65	10	20	8	40	13	20
2009	25	78	11	6	2	11	8	45	8	18	11	39	7	9	10	11	10	6	5	5	7	3	45	10	9	18	16	52	16	26	3	17	5	9	16	18	16	11	20	16	25	149	65	10	20	8	40	13	20
2009	26	79	11	6	2	11	8	45	8	18	11	39	7	9	10	11	10	6	5	5	7	3	45	10	9	18	16	52	16	26	3	17	5	9	16	18	16	11	20	16	25	149	65	10	20	8	40	13	20
2009	27	80	11	6	2	11	8	45	8	18	11	39	7	9	10	11	10	6	5	5	7	3	45	10	9	18	16	52	16	26	3	17	5	9	16	18	16	11	20	16	25	149	65	10	20	8	40	13	20
2009	28	81	11	6	2	11	8	45	8	18	11	39	7	9	10	11	10	6	5	5	7	3	45	10	9	18	16	52	16	26	3	17	5	9	16	18	16	11	20	16	25	149	65	10	20	8	40	13	20
2009	29	82	11	6	2	11	8	45	8	18	11	39	7	9	10	11	10	6	5	5	7	3	45	10	9	18	16	52	16	26	3	17	5	9	16	18	16	11	20	16	25	149	65	10	20	8	40	13	20
2009	30	83	11	6	2	11	8	45	8	18	11	39	7	9	10	11	10	6	5	5	7	3	45	10	9	18	16	52	16	26	3	17	5	9	16	18	16	11	20	16	25	149	65	10	20	8	40	13	20
2009	31	84	11	6	2	11	8	45	8	18	11	39	7	9	10	11	10	6	5	5	7	3	45	10	9	18	16	52	16	26	3	17	5	9	16	18	16	11	20	16	25	150	65	10	20	8	40	13	20
2009	32	85	11	6	2	11	8	45	8	18	11	39	7	9	10	11	10	6	5	5	7	3	45	10	9	18	16	52	16	26	3	17	5	9	16	18	16	11	20	16	25	149	65	10	20	8	40	13	20
2009	33	86	11	6	2	11	8	45	8	18	11	39	7	9	10	11	10	6	5	5	7	3	45	10	9	18	16	52	16	26	3	17	5	9	16	18	16	11	20	16	25	149	65	10	20	8	40	13	20
2009	34	87	11	6	2	11	8	45	8	18	11	39	7	9	10	11	10	6	5	5	7	3	45	10	9	18	16	52	16	26	3	17	5	9	16	18	16	11	20	16	25	149	65	10	20	8	40	13	20
2009	35	88	11	6	2	11	8	45	8	18	11	39	7	9	10	11	10	6	5	5	7	3	45	10	9	18	16	52	16	26	3	17	5	9	16	18	16	11	20	16	25	149	65	10	20	8	40	13	20
2009	36	89	11	6	2	11	8	45	9	18	11	39	7	8	10	11	10	6	5	5	7	3	45	10	9	18	16	52	16	26	3	17	5	9	16	18	16	11	20	16	25	149	65	10	20	8	40	13	20
2009	37	90	11	6	2	12	8	45	8	18	11	39	7	10	10	11	10	6	5	5	7	3	45	10	9	18	16	52	21	26	3	17	5	9	16	18	16	11	20	16	25	149	65	10	20	8	40	13	20
2009	38	91	11	6	2	11	8	45	8	18	11	39	7	9	10	11	10	6	5	5	7	3	45	10	9	18	16	52	16	26	3	17	5	9	16	18	16	11	20	16	25	149	65	10	20	8	40	13	20
2009	39	92	11	6	2	11	8	45	8	18	11	38	7	8	10	11	10	6	5	5	7	3	45	10	9	18	16	52	16	26	3	17	5	9	16	18	16	11	20	16	25	151	65	10	22	8	40	13	20
2009	40	93	11	6	2	11	8	45	8	19	11	40	7	10	10	11	10	6	5	5	7	3	46	10	9	18	16	52	16	26	3	17	5	9	16	18	16	11	20	16	25	149	65	10	21	8	40	13	20
2009	41	94	11	6	2	11	8	45	8	18	11	39	7	9	10	11	10	6	5	5	7	3	45	10	9	18	16	52	16	26	3	17	5	9	16	18	16	11	20	16	25	149	65	10	20	8	40	13	20
2009	42	95	11	6	2	11	8	45	10	18	11	22	7	12	10	11	10	6	5	4	7	3	45	10	2	8	16	52	16	26	3	17	5	14	17	18	16	11	20	16	25	150	66	10	20	8	40	13	20
2009	43	96	11	7	2	11	8	45	6	18	11	17	7	6	10	11	10	6	5	1	7	3	45	10	7	12	16	52	16	26	3	17	5	4	16	18	16	11	20	16	25	148	64	10	20	8	40	13	20
2009	44	97	11	6	2	11	8	46	8	18	11	39	7	9	10	11	10	6	5	5	7	3	46	10	9	18	16	52	16	26	3	17	5	9	16	18	16	11	20	16	25	149	65	10	20	8	40	13	20
2009	45	98	11	6	2	11	8	45	8	19	11	39	7	9	10	11	10	6	5	5	7	3	45	10	9	18	16	52	16	26	3	17	5	9	16	18	16	11	20	16	25	149	65	10	20	8	40	13	20
2009	46	99	11	7	2	11	8	45	8	18	11	39	7	9	10	11	10	6	5	5	7	3	45	10	9	18	16	52	16	26	3	17	5	9	16	18	16	11	20	16	25	149	65	10	20	8	40	13	20
2009	47	100	11	6	2	11	8	45	8	18	11	39	7	9	10	11	10	6	5	5	7	3	45	10	9	18	16	52	16	26	3	17	5	9	16	18	16	11	20	16	25	149	65	10	20	8	40	13	20
2009	48	101	11	6	2	11	8	45	8	18	11	40	7	9	10	11	10	6	5	5	7	3	45	10	9	18	16	52	16	26	3	17	5	9	16	18	16	11	20	16	25	149	65	10	20	8	40	13	20
2009	49	102	11	6	2	11	8	45	8	18	11	38	7	9	10	11	10	6	5	5	7	3	45	10	9	18	16	53	16	26	3	17	5	9	16	18	16	13	20	16	25	150	65	10	20	8	40	13	20
2009	50	103	11	6	2	11	8	45	8	18	11	40	7	9	10	11	10	6	5	5	7	3	45	10	9	18	16	52	16	26	3	17	5	9	16	18	16	11	20	16	25	149	65	10	20	8	40	13	20
2009	51	104	11	6	2	11	8	45	8	18	11	39	7	9	10	11	10	6	5	5	7	3	45	10	9	18	16	52	16	26	3	17	5	10	16	18	16	11	20	16	25	149	65	10	20	8	39	13	20
2009	52	105	11	6	2	11	8	45	8	18	11	39	7	9	8	11	9	6	5	5	7	3	45	10	9	18	16	52	16	26	3	17	5	8	16	18	16	11	20	16	25	149	65	10	20	8	40	13	20
2010	1	106	11	6	2	11	8	45	8	18	11	39	7	9	10	11	10	6	5	5	7	3	45	10	9	18	16	52	16	26	3	17	5	9	16	18	16	11	20	16	25	149	65	10	20	8	40	13	20
2010	2	107	11	6	2	11	8	45	8	18	11	39	7	9	10	11	10	6	5	5	7	3	45	10	9	18	16	52	16	26	3	17	5	9	16	18	16	11	20	16	25	149	65	10	20	8	41	13	20
2010	3	108	11	6	2	11	8	45	8	18	11	39	7	9	10	11	10	6	5	5	7	3	45	10	9	18	16	52	16	26	3	17	5	9	16	18	16	11	20	16	25	149	65	10	20	8	40	13	20
2010	4	109	11	6	2	11	8	45	8	18	11	39	7	9	10	11	10	6	5	5	7	3	45	10	9	18	16	52	16	26	3	17	5	9	16	18	16	11	20	16	25	149	65	10	20	8	40	13	20
2010	5	110	11	6	2	11	8	45	8	18	11	39	7	9	10	11	10	6	5	5	7	3	45	10	9	18	16	52	16	26	3	17	5	9	16	18	16	11	20	16	25	149	65	10	20	8	40	13	20
2010	6	111	11	6	2	11	8	45	8	18	11	39	7	9	10	11	10	6	5	5	7	3	45	10	9	18	16	52	16	26	3	17	5	9	16	18	16	11	20	16	25	149	65	10	20	8	40	13	20
2010	7	112	11	6	2	11	8	45	8	18	11	39	7	9	10	11	10	6	5	5	7	3	45	10	9	18	16	52	16	26	3	17	5	9	16	18	16	11	20	16	25	149	65	10	20	8	40	13	20
2010	8	113	11	6	2	11	8	45	8	18	11	39	7	9	10	11	10	6	5	5	7	3	45	10	9	18	16	52	16	26	3	17	5	9	16	18	16	11	20	16	25	149	65	10	20	8	40	13	20
2010	9	114	11	6	2	11	8	45	8	18	11	39	7	9	10	11	10	6	5	5	7	3	45	10	9	18	16	52	16	26	3	17	5	9	16	18	16	11	20	16	25	149	65	10	20	8	40	13	20
2010	10	115	11	6	2	11	8	45	8	18	11	39	7	9	10	11	10	6	5	5	7	3	45	10	9	18	16	52	16	26	3	17	5	9	16	18	16	11	20	16	25	149	65	10	20	8	40	13	20
2010	11	116	11	6	2	12	8	45	8	18	11	39	7	8	10	11	10	6	5	5	7	3	45	10	9	18	16	52	16	26	3	17	5	9	16	18	16	11	20	16	25	150	65	10	20	8	40	13	20
2010	12	117	11	6	2	11	8	45	8	18	11	39	7	9	10	11	10	6	5	5	7	3	45	10	9	18	16	52	16	26	3	17	5	9	16	18	16	11	20	16	25	150	65	10	20	8	40	13	20
2010	13	118	11	6	2	12	8	45	8	18	13	38	7	10	10	11	10	6	5	5	7	3	45	10	9	18	16	53	16	26	3	17	6	9	16	18	16	11	20	16	25	150	65	10	20	8	40	13	20
2010	14	119	11	6	2	11	8	46	8	18	12	37	8	9	10	14	10	6	10	5	11	3	45	10	9	20	16	57	16	26	3	18	5	8	16	19	16	11	20	16	25	152	68	12	21	8	40	14	21
2010	15	120	11	6	2	11	8	45	9	18	11	47	10	9	13	11	10	6	5	5	7	3	46	10	9	19	16	52	16	26	3	17	5	10	16	18	16	11	20	16	25	149	67	11	21	8	39	14	21
2010	16	121	11	6	2	11	8	45	8	17	11	40	7	9	10	11	10	6	5	5	7	3	45	10	9	18	16	52	16	26	3	17	5	9	16	18	16	13	20	16	25	149	68	10	20	8	40	13	20
2010	17	122	11	6	2	11	8	45	8	18	11	40	7	10	10	11	10	6	4	5	7	3	45	10	9	18	16	52	16	26	3	17	5	9	16	18	16	11	20	16	25	149	66	10	20	8	40	12	20
2010	18	123	11	6	2	11	8	45	8	18	11	38	7	9	10	11	10	6	5	5	7	3	45	10	9	18	16	52	16	26	3	17	5	9	16	18	16	11	20	16	25	149	65	10	20	8	40	13	20
2010	19	124	11	6	2	11	8	45	8	18	11	39	7	9	10	11	10	6	5	5	7	3	45	10	9	18	16	52	16	26	3	17	5	9	16	18	16	11	20	16	25	149	65	10	20	8	40	13	20
2010	20	125	11	6	2	11	8	45	8	18	11	39	7	9	10	11	10	6	5	5	7	3	45	10	9	18	16	52	16	26	3	17	5	9	16	18	16	11	20	16	25	150	65	10	20	8	40	13	20
2010	21	126	11	6	2	11	8	45	8	18	11	39	7	9	10	11	10	6	5	5	7	3	45	10	9	18	16	52	16	26	3	17	5	9	16	18	16	11	20	16	25	149	65	10	20	8	40	13	20
2010	22	127	11	6	2	11	8	45	8	18	11	39	7	8	10	12	10	6	5	5	7	3	45	10	9	18	16	52	16	26	3	17	5	9	16	18	16	11	20	16	25	149	65	10	20	9	41	13	20
2010	23	128	11	6	2	11	8	45	8	18	11	39	7	10	10	11	10	6	5	5	7	3	45	10	9	18	16	52	16	26	3	17	5	9	16	18	16	11	20	16	25	149	65	10	20	9	40	13	20
2010	24	129	11	6	2	11	8	45	8	18	11	39	7	9	10	11	10	6	5	5	7	3	45	10	9	18	15	52	16	26	3	17	5	9	16	18	16	11	20	16	25	149	65	10	20	8	40	13	20
2010	25	130	11	6	2	11	8	45	8	18	11	39	7	9	10	11	10	6	5	5	7	3	45	10	9	18	16	52	16	26	3	17	5	9	16	18	16	11	20	16	25	149	65	10	20	8	40	13	20
2010	26	131	11	6	2	11	8	45	8	18	11	39	7	9	10	11	10	6	5	5	7	3	45	10	9	18	16	52	16	26	3	17	5	9	16	18	16	11	20	16	25	149	65	10	20	8	40	13	20
2010	27	132	11	6	2	11	8	45	8	18	11	39	7	9	10	11	10	6	5	5	7	3	45	10	9	18	16	52	16	26	3	17	5	9	16	18	16	11	20	16	25	149	65	10	20	8	40	13	20
2010	28	133	11	6	2	11	8	45	8	18	11	39	7	9	10	11	10	6	5	5	7	3	45	10	9	18	16	52	16	26	3	17	5	9	16	18	16	11	20	16	25	149	65	10	20	8	40	13	20
2010	29	134	11	6	2	11	8	45	8	18	11	39	7	9	10	11	10	6	5	5	7	3	45	10	9	18	16	52	16	26	3	17	5	9	16	18	16	11	20	16	25	149	65	10	20	8	40	13	20
2010	30	135	11	6	2	11	8	45	8	18	11	39	7	9	10	11	10	6	5	5	7	3	45	10	9	18	16	52	16	26	3	17	5	9	16	18	16	11	20	16	25	149	65	10	20	8	40	13	20
2010	31	136	11	6	2	11	8	45	8	18	11	39	7	9	10	11	10	6	5	5	7	3	45	10	9	18	16	52	16	26	3	17	5	9	16	18	16	11	20	16	25	150	65	10	20	8	40	13	20
2010	32	137	11	6	2	11	8	45	8	18	11	39	7	9	10	11	10	6	5	5	7	3	45	10	9	18	16	52	16	26	3	17	5	9	16	18	16	11	20	16	25	149	65	10	20	8	40	13	20
2010	33	138	11	6	2	11	8	45	8	18	11	39	7	9	10	11	10	6	5	5	7	3	45	10	9	18	16	52	16	26	3	17	5	9	16	18	16	11	20	16	25	149	65	10	20	8	40	13	20
2010	34	139	11	6	2	11	8	45	8	18	11	39	7	9	10	11	10	6	5	5	7	3	45	10	9	18	16	52	16	26	3	17	5	9	16	18	16	11	20	16	25	149	65	10	20	8	40	13	20
2010	35	140	11	6	2	11	8	45	8	18	11	39	7	9	10	11	10	6	5	5	7	3	45	10	9	18	16	52	16	26	3	17	5	9	16	18	16	11	20	16	25	149	65	10	20	8	40	13	20
2010	36	141	11	6	2	11	8	45	9	18	11	39	7	8	10	11	10	6	5	5	7	3	45	10	9	18	16	52	16	26	3	17	5	9	16	18	16	11	20	16	25	149	65	10	20	8	40	13	20
2010	37	142	11	6	2	12	8	45	8	18	11	39	7	10	10	11	10	6	5	5	7	3	45	10	9	18	16	52	21	26	3	17	5	9	16	18	16	11	20	16	25	149	65	10	20	8	40	13	20
2010	38	143	11	6	2	11	8	45	8	18	11	39	7	9	10	11	10	6	5	5	7	3	45	10	9	18	16	52	16	26	3	17	5	9	16	18	16	11	20	16	25	149	65	10	20	8	40	13	20
2010	39	144	11	6	2	11	8	45	8	18	11	38	7	8	10	11	10	6	5	5	7	3	45	10	9	18	16	52	16	26	3	17	5	9	16	18	16	11	20	16	25	151	65	10	22	8	40	13	20
2010	40	145	11	6	2	11	8	45	8	19	11	40	7	10	10	11	10	6	5	5	7	3	46	10	9	18	16	52	16	26	3	17	5	9	16	18	16	11	20	16	25	149	65	10	21	8	40	13	20
2010	41	146	11	6	2	11	8	45	8	18	11	39	7	9	10	11	10	6	5	5	7	3	45	10	9	18	16	52	16	26	3	17	5	9	16	18	16	11	20	16	25	149	65	10	20	8	40	13	20
2010	42	147	11	6	2	11	8	45	10	18	11	22	7	12	10	11	10	6	5	4	7	3	45	10	2	8	16	52	16	26	3	17	5	14	17	18	16	11	20	16	25	150	66	10	20	8	40	13	20
2010	43	148	11	7	2	11	8	45	6	18	11	17	7	6	10	11	10	6	5	1	7	3	45	10	7	12	16	52	16	26	3	17	5	4	16	18	16	11	20	16	25	148	64	10	20	8	40	13	20
2010	44	149	11	6	2	11	8	46	8	18	11	39	7	9	10	11	10	6	5	5	7	3	46	10	9	18	16	52	16	26	3	17	5	9	16	18	16	11	20	16	25	149	65	10	20	8	40	13	20
2010	45	150	11	6	2	11	8	45	8	19	11	39	7	9	10	11	10	6	5	5	7	3	45	10	9	18	16	52	16	26	3	17	5	9	16	18	16	11	20	16	25	149	65	10	20	8	40	13	20
2010	46	151	11	7	2	11	8	45	8	18	11	39	7	9	10	11	10	6	5	5	7	3	45	10	9	18	16	52	16	26	3	17	5	9	16	18	16	11	20	16	25	149	65	10	20	8	40	13	20
2010	47	152	11	6	2	11	8	45	8	18	11	39	7	9	10	11	10	6	5	5	7	3	45	10	9	18	16	52	16	26	3	17	5	9	16	18	16	11	20	16	25	149	65	10	20	8	40	13	20
2010	48	153	11	6	2	11	8	45	8	18	11	40	7	9	10	11	10	6	5	5	7	3	45	10	9	18	16	52	16	26	3	17	5	9	16	18	16	11	20	16	25	149	65	10	20	8	40	13	20
2010	49	154	11	6	2	11	8	45	8	18	11	38	7	9	10	11	10	6	5	5	7	3	45	10	9	18	16	53	16	26	3	17	5	9	16	18	16	13	20	16	25	150	65	10	20	8	40	13	20
2010	50	155	11	6	2	11	8	45	8	18	11	40	7	9	10	11	10	6	5	5	7	3	45	10	9	18	16	52	16	26	3	17	5	9	16	18	16	11	20	16	25	149	65	10	20	8	40	13	20
2010	51	156	11	6	2	11	8	45	8	18	11	39	7	9	10	11	10	6	5	5	7	3	45	10	9	18	16	52	16	26	3	17	5	10	16	18	16	11	20	16	25	149	65	10	20	8	39	13	20
2010	52	157	11	6	2	11	8	45	8	18	11	39	7	9	8	11	9	6	5	5	7	3	45	10	9	18	16	52	16	26	3	17	5	8	16	18	16	11	20	16	25	149	65	10	20	8	40	13	20
2011	1	158	11	6	2	11	8	45	8	18	11	39	7	9	10	11	10	6	5	5	7	3	45	10	9	18	16	52	16	26	3	17	5	9	16	18	16	11	20	16	25	149	65	10	20	8	40	13	20
2011	2	159	11	6	2	11	8	45	8	18	11	39	7	9	10	11	10	6	5	5	7	3	45	10	9	18	16	52	16	26	3	17	5	9	16	18	16	11	20	16	25	149	65	10	20	8	41	13	20
2011	3	160	11	6	2	11	8	45	8	18	11	39	7	9	10	11	10	6	5	5	7	3	45	10	9	18	16	52	16	26	3	17	5	9	16	18	16	11	20	16	25	149	65	10	20	8	40	13	20
2011	4	161	11	6	2	11	8	45	8	18	11	39	7	9	10	11	10	6	5	5	7	3	45	10	9	18	16	52	16	26	3	17	5	9	16	18	16	11	20	16	25	149	65	10	20	8	40	13	20
2011	5	162	11	6	2	11	8	45	8	18	11	39	7	9	10	11	10	6	5	5	7	3	45	10	9	18	16	52	16	26	3	17	5	9	16	18	16	11	20	16	25	149	65	10	20	8	40	13	20
2011	6	163	11	6	2	11	8	45	8	18	11	39	7	9	10	11	10	6	5	5	7	3	45	10	9	18	16	52	16	26	3	17	5	9	16	18	16	11	20	16	25	149	65	10	20	8	40	13	20
2011	7	164	11	6	2	11	8	45	8	18	11	39	7	9	10	11	10	6	5	5	7	3	45	10	9	18	16	52	16	26	3	17	5	9	16	18	16	11	20	16	25	149	65	10	20	8	40	13	20
2011	8	165	11	6	2	11	8	45	8	18	11	39	7	9	10	11	10	6	5	5	7	3	45	10	9	18	16	52	16	26	3	17	5	9	16	18	16	11	20	16	25	149	65	10	20	8	40	13	20
2011	9	166	11	6	2	11	8	45	8	18	11	39	7	9	10	11	10	6	5	5	7	3	45	10	9	18	16	52	16	26	3	17	5	9	16	18	16	11	20	16	25	149	65	10	20	8	40	13	20
2011	10	167	11	6	2	11	8	45	8	18	11	39	7	9	10	11	10	6	5	5	7	3	45	10	9	18	16	52	16	26	3	17	5	9	16	18	16	11	20	16	25	149	65	10	20	8	40	13	20
2011	11	168	11	6	2	12	8	45	8	18	11	39	7	8	10	11	10	6	5	5	7	3	45	10	9	18	16	52	16	26	3	17	5	9	16	18	16	11	20	16	25	150	65	10	20	8	40	13	20
2011	12	169	11	6	2	11	8	45	8	18	11	39	7	9	10	11	10	6	5	5	7	3	45	10	9	18	16	52	16	26	3	17	5	9	16	18	16	11	20	16	25	150	65	10	20	8	40	13	20
2011	13	170	11	6	2	12	8	45	8	18	13	38	7	10	10	11	10	6	5	5	7	3	45	10	9	18	16	53	16	26	3	17	6	9	16	18	16	11	20	16	25	150	65	10	20	8	40	13	20
2011	14	171	11	6	2	11	8	46	8	18	12	37	8	9	10	14	10	6	10	5	11	3	45	10	9	20	16	57	16	26	3	18	5	8	16	19	16	11	20	16	25	152	68	12	21	8	40	14	21
2011	15	172	11	6	2	11	8	45	9	18	11	47	10	9	13	11	10	6	5	5	7	3	46	10	9	19	16	52	16	26	3	17	5	10	16	18	16	11	20	16	25	149	67	11	21	8	39	14	21
2011	16	173	11	6	2	11	8	45	8	17	11	40	7	9	10	11	10	6	5	5	7	3	45	10	9	18	16	52	16	26	3	17	5	9	16	18	16	13	20	16	25	149	68	10	20	8	40	13	20
2011	17	174	11	6	2	11	8	45	8	18	11	40	7	10	10	11	10	6	4	5	7	3	45	10	9	18	16	52	16	26	3	17	5	9	16	18	16	11	20	16	25	149	66	10	20	8	40	12	20
2011	18	175	11	6	2	11	8	45	8	18	11	38	7	9	10	11	10	6	5	5	7	3	45	10	9	18	16	52	16	26	3	17	5	9	16	18	16	11	20	16	25	149	65	10	20	8	40	13	20
2011	19	176	11	6	2	11	8	45	8	18	11	39	7	9	10	11	10	6	5	5	7	3	45	10	9	18	16	52	16	26	3	17	5	9	16	18	16	11	20	16	25	149	65	10	20	8	40	13	20
2011	20	177	11	6	2	11	8	45	8	18	11	39	7	9	10	11	10	6	5	5	7	3	45	10	9	18	16	52	16	26	3	17	5	9	16	18	16	11	20	16	25	150	65	10	20	8	40	13	20
2011	21	178	11	6	2	11	8	45	8	18	11	39	7	9	10	11	10	6	5	5	7	3	45	10	9	18	16	52	16	26	3	17	5	9	16	18	16	11	20	16	25	149	65	10	20	8	40	13	20
2011	22	179	11	6	2	11	8	45	8	18	11	39	7	8	10	12	10	6	5	5	7	3	45	10	9	18	16	52	16	26	3	17	5	9	16	18	16	11	20	16	25	149	65	10	20	9	41	13	20
2011	23	180	11	6	2	11	8	45	8	18	11	39	7	10	10	11	10	6	5	5	7	3	45	10	9	18	16	52	16	26	3	17	5	9	16	18	16	11	20	16	25	149	65	10	20	9	40	13	20
2011	24	181	11	6	2	11	8	45	8	18	11	39	7	9	10	11	10	6	5	5	7	3	45	10	9	18	15	52	16	26	3	17	5	9	16	18	16	11	20	16	25	149	65	10	20	8	40	13	20
2011	25	182	11	6	2	11	8	45	8	18	11	39	7	9	10	11	10	6	5	5	7	3	45	10	9	18	16	52	16	26	3	17	5	9	16	18	16	11	20	16	25	149	65	10	20	8	40	13	20
2011	26	183	11	6	2	11	8	45	8	18	11	39	7	9	10	11	10	6	5	5	7	3	45	10	9	18	16	52	16	26	3	17	5	9	16	18	16	11	20	16	25	149	65	10	20	8	40	13	20
2011	27	184	11	6	2	11	8	45	8	18	11	39	7	9	10	11	10	6	5	5	7	3	45	10	9	18	16	52	16	26	3	17	5	9	16	18	16	11	20	16	25	149	65	10	20	8	40	13	20
2011	28	185	11	6	2	11	8	45	8	18	11	39	7	9	10	11	10	6	5	5	7	3	45	10	9	18	16	52	16	26	3	17	5	9	16	18	16	11	20	16	25	149	65	10	20	8	40	13	20
2011	29	186	11	6	2	11	8	45	8	18	11	39	7	9	10	11	10	6	5	5	7	3	45	10	9	18	16	52	16	26	3	17	5	9	16	18	16	11	20	16	25	149	65	10	20	8	40	13	20
2011	30	187	11	6	2	11	8	45	8	18	11	39	7	9	10	11	10	6	5	5	7	3	45	10	9	18	16	52	16	26	3	17	5	9	16	18	16	11	20	16	25	149	65	10	20	8	40	13	20
2011	31	188	11	6	2	11	8	45	8	18	11	39	7	9	10	11	10	6	5	5	7	3	45	10	9	18	16	52	16	26	3	17	5	9	16	18	16	11	20	16	25	150	65	10	20	8	40	13	20
2011	32	189	11	6	2	11	8	45	8	18	11	39	7	9	10	11	10	6	5	5	7	3	45	10	9	18	16	52	16	26	3	17	5	9	16	18	16	11	20	16	25	149	65	10	20	8	40	13	20
2011	33	190	11	6	2	11	8	45	8	18	11	39	7	9	10	11	10	6	5	5	7	3	45	10	9	18	16	52	16	26	3	17	5	9	16	18	16	11	20	16	25	149	65	10	20	8	40	13	20
2011	34	191	11	6	2	11	8	45	8	18	11	39	7	9	10	11	10	6	5	5	7	3	45	10	9	18	16	52	16	26	3	17	5	9	16	18	16	11	20	16	25	149	65	10	20	8	40	13	20
2011	35	192	11	6	2	11	8	45	8	18	11	39	7	9	10	11	10	6	5	5	7	3	45	10	9	18	16	52	16	26	3	17	5	9	16	18	16	11	20	16	25	149	65	10	20	8	40	13	20
2011	36	193	11	6	2	11	8	45	9	18	11	39	7	8	10	11	10	6	5	5	7	3	45	10	9	18	16	52	16	26	3	17	5	9	16	18	16	11	20	16	25	149	65	10	20	8	40	13	20
2011	37	194	11	6	2	12	8	45	8	18	11	39	7	10	10	11	10	6	5	5	7	3	45	10	9	18	16	52	21	26	3	17	5	9	16	18	16	11	20	16	25	149	65	10	20	8	40	13	20
2011	38	195	11	6	2	11	8	45	8	18	11	39	7	9	10	11	10	6	5	5	7	3	45	10	9	18	16	52	16	26	3	17	5	9	16	18	16	11	20	16	25	149	65	10	20	8	40	13	20
2011	39	196	11	6	2	11	8	45	8	18	11	38	7	8	10	11	10	6	5	5	7	3	45	10	9	18	16	52	16	26	3	17	5	9	16	18	16	11	20	16	25	151	65	10	22	8	40	13	20
2011	40	197	11	6	2	11	8	45	8	19	11	40	7	10	10	11	10	6	5	5	7	3	46	10	9	18	16	52	16	26	3	17	5	9	16	18	16	11	20	16	25	149	65	10	21	8	40	13	20
2011	41	198	11	6	2	11	8	45	8	18	11	39	7	9	10	11	10	6	5	5	7	3	45	10	9	18	16	52	16	26	3	17	5	9	16	18	16	11	20	16	25	149	65	10	20	8	40	13	20
2011	42	199	11	6	2	11	8	45	10	18	11	22	7	12	10	11	10	6	5	4	7	3	45	10	2	8	16	52	16	26	3	17	5	14	17	18	16	11	20	16	25	150	66	10	20	8	40	13	20
2011	43	200	11	7	2	11	8	45	6	18	11	17	7	6	10	11	10	6	5	1	7	3	45	10	7	12	16	52	16	26	3	17	5	4	16	18	16	11	20	16	25	148	64	10	20	8	40	13	20
2011	44	201	11	6	2	11	8	46	8	18	11	39	7	9	10	11	10	6	5	5	7	3	46	10	9	18	16	52	16	26	3	17	5	9	16	18	16	11	20	16	25	149	65	10	20	8	40	13	20
2011	45	202	11	6	2	11	8	45	8	19	11	39	7	9	10	11	10	6	5	5	7	3	45	10	9	18	16	52	16	26	3	17	5	9	16	18	16	11	20	16	25	149	65	10	20	8	40	13	20
2011	46	203	11	7	2	11	8	45	8	18	11	39	7	9	10	11	10	6	5	5	7	3	45	10	9	18	16	52	16	26	3	17	5	9	16	18	16	11	20	16	25	149	65	10	20	8	40	13	20
2011	47	204	11	6	2	11	8	45	8	18	11	39	7	9	10	11	10	6	5	5	7	3	45	10	9	18	16	52	16	26	3	17	5	9	16	18	16	11	20	16	25	149	65	10	20	8	40	13	20
2011	48	205	11	6	2	11	8	45	8	18	11	40	7	9	10	11	10	6	5	5	7	3	45	10	9	18	16	52	16	26	3	17	5	9	16	18	16	11	20	16	25	149	65	10	20	8	40	13	20
2011	49	206	11	6	2	11	8	45	8	18	11	38	7	9	10	11	10	6	5	5	7	3	45	10	9	18	16	53	16	26	3	17	5	9	16	18	16	13	20	16	25	150	65	10	20	8	40	13	20
2011	50	207	11	6	2	11	8	45	8	18	11	40	7	9	10	11	10	6	5	5	7	3	45	10	9	18	16	52	16	26	3	17	5	9	16	18	16	11	20	16	25	149	65	10	20	8	40	13	20
2011	51	208	11	6	2	11	8	45	8	18	11	39	7	9	10	11	10	6	5	5	7	3	45	10	9	18	16	52	16	26	3	17	5	10	16	18	16	11	20	16	25	149	65	10	20	8	39	13	20
2011	52	209	11	6	2	11	8	45	8	18	11	39	7	9	8	11	9	6	5	5	7	3	45	10	9	18	16	52	16	26	3	17	5	8	16	18	16	11	20	16	25	149	65	10	20	8	40	13	20
[truncated: 30 more columns]

## Sheet: Temperature
NM_BAIRRO	TEMP	DATA
Forte São João	33.0802	1_8_Jan_2008
Parque Moscoso	34.1041	1_8_Jan_2008
Vila Rubim	34.2058	1_8_Jan_2008
Santa Clara	34.0488	1_8_Jan_2008
Do Moscoso	33.6998	1_8_Jan_2008
Fonte Grande	33.5219	1_8_Jan_2008
Piedade	33.5333	1_8_Jan_2008
Centro	34.0523	1_8_Jan_2008
Santo Antônio	33.521	1_8_Jan_2008
Inhanguetá	32.3508	1_8_Jan_2008
Estrelinha	31.8053	1_8_Jan_2008
Grande Vitória	30.7745	1_8_Jan_2008
Universitário	31.6476	1_8_Jan_2008
Juncao 2	32.5605	1_8_Jan_2008
Santa Tereza	33.1827	1_8_Jan_2008
Do Cabral	33.7121	1_8_Jan_2008
Do Quadro	33.8936	1_8_Jan_2008
Caratoíra	33.863	1_8_Jan_2008
Juncao 1	34.0138	1_8_Jan_2008
Mário Cypreste	34.647	1_8_Jan_2008
Ilha do Príncipe	34.8999	1_8_Jan_2008
Bento Ferreira	30.8178	1_8_Jan_2008
Jesus de Nazareth	28.8468	1_8_Jan_2008
Monte Belo	31.9828	1_8_Jan_2008
Ilha de Santa Maria	32.3841	1_8_Jan_2008
Romão	33.1713	1_8_Jan_2008
Cruzamento	32.8068	1_8_Jan_2008
Fradinhos	32.7261	1_8_Jan_2008
Jucutuquara	32.6697	1_8_Jan_2008
Nazareth	32.6255	1_8_Jan_2008
De Lourdes	32.8472	1_8_Jan_2008
Consolação	33.0025	1_8_Jan_2008
Gurigica	32.0131	1_8_Jan_2008
Horto	32.2339	1_8_Jan_2008
Maruípe	32.7422	1_8_Jan_2008
Tabuazeiro	32.5048	1_8_Jan_2008
São Cristovão	33.4136	1_8_Jan_2008
Joana D'arc	32.3724	1_8_Jan_2008
Santa Martha	33.3292	1_8_Jan_2008
Andorinhas	33.8588	1_8_Jan_2008
Itararé	33.8918	1_8_Jan_2008
Da Penha	33.7688	1_8_Jan_2008
Bonfim	33.4943	1_8_Jan_2008
São Benedito	33.2856	1_8_Jan_2008
Santos Dumont	32.9736	1_8_Jan_2008
Santa Cecília	32.5731	1_8_Jan_2008
Ilha do Frade	29.6472	1_8_Jan_2008
Ilha do Boi	28.6754	1_8_Jan_2008
Enseada do Suá	28.5152	1_8_Jan_2008
Santa Helena	29.3942	1_8_Jan_2008
Juncao 3	29.2533	1_8_Jan_2008
Santa Lúcia	31.7087	1_8_Jan_2008
Barro Vermelho	33.442	1_8_Jan_2008
Santa Luíza	34.2416	1_8_Jan_2008
Praia do Canto	31.3075	1_8_Jan_2008
Ilha das Caieiras	29.7469	1_8_Jan_2008
Santo André	29.4572	1_8_Jan_2008
Condusa	30.6595	1_8_Jan_2008
Juncao 4	30.1571	1_8_Jan_2008
Redenção	29.8292	1_8_Jan_2008
Nova Palestina	29.7745	1_8_Jan_2008
Conquista	30.4209	1_8_Jan_2008
Resistência	29.22	1_8_Jan_2008
Pontal de Camburí	34.1406	1_8_Jan_2008
Mata da Praia	34.231	1_8_Jan_2008
Boa Vista	33.8336	1_8_Jan_2008
Morada de Camburí	33.7963	1_8_Jan_2008
República	33.3682	1_8_Jan_2008
Goiabeiras	32.1532	1_8_Jan_2008
Antonio Honório	31.9832	1_8_Jan_2008
Juncao 5	32.147	1_8_Jan_2008
Maria Ortiz	30.6908	1_8_Jan_2008
Jabour	32.3863	1_8_Jan_2008
Jardim Camburí	30.6808	1_8_Jan_2008
Aeroporto	33.6702	1_8_Jan_2008
Carapina	32.1582	1_8_Jan_2008
De Fátima	30.2928	1_8_Jan_2008
Jardim da Penha	34.2493	1_8_Jan_2008
Forte São João	32.7949	1_8_Jan_2010
Parque Moscoso	33.4883	1_8_Jan_2010
Vila Rubim	33.5774	1_8_Jan_2010
Santa Clara	33.3141	1_8_Jan_2010
Do Moscoso	32.5924	1_8_Jan_2010
Fonte Grande	31.266	1_8_Jan_2010
Piedade	31.8926	1_8_Jan_2010
Centro	33.6212	1_8_Jan_2010
Santo Antônio	32.4312	1_8_Jan_2010
Inhanguetá	30.4161	1_8_Jan_2010
Estrelinha	30.1665	1_8_Jan_2010
Grande Vitória	28.6499	1_8_Jan_2010
Universitário	28.667	1_8_Jan_2010
Juncao 2	30.2333	1_8_Jan_2010
Santa Tereza	31.72	1_8_Jan_2010
Do Cabral	32.7772	1_8_Jan_2010
Do Quadro	33.1066	1_8_Jan_2010
Caratoíra	32.9771	1_8_Jan_2010
Juncao 1	33.0998	1_8_Jan_2010
Mário Cypreste	33.6213	1_8_Jan_2010
Ilha do Príncipe	34.4789	1_8_Jan_2010
Bento Ferreira	31.3195	1_8_Jan_2010
Jesus de Nazareth	29.6197	1_8_Jan_2010
Monte Belo	32.8127	1_8_Jan_2010
Ilha de Santa Maria	32.7034	1_8_Jan_2010
Romão	32.4429	1_8_Jan_2010
Cruzamento	32.4495	1_8_Jan_2010
Fradinhos	30.4445	1_8_Jan_2010
Jucutuquara	32.7102	1_8_Jan_2010
Nazareth	33.132	1_8_Jan_2010
De Lourdes	32.9022	1_8_Jan_2010
Consolação	32.8903	1_8_Jan_2010
Gurigica	30.0701	1_8_Jan_2010
Horto	32.4791	1_8_Jan_2010
Maruípe	30.9555	1_8_Jan_2010
Tabuazeiro	30.1884	1_8_Jan_2010
São Cristovão	31.3075	1_8_Jan_2010
Joana D'arc	30.9548	1_8_Jan_2010
Santa Martha	31.4352	1_8_Jan_2010
Andorinhas	31.8132	1_8_Jan_2010
Itararé	31.2691	1_8_Jan_2010
Da Penha	31.9332	1_8_Jan_2010
Bonfim	32.5117	1_8_Jan_2010
São Benedito	31.0683	1_8_Jan_2010
Santos Dumont	32.2203	1_8_Jan_2010
Santa Cecília	31.583	1_8_Jan_2010
Ilha do Frade	26.126	1_8_Jan_2010
Ilha do Boi	24.2488	1_8_Jan_2010
Enseada do Suá	25.3345	1_8_Jan_2010
Santa Helena	25.1159	1_8_Jan_2010
Juncao 3	28.0716	1_8_Jan_2010
Santa Lúcia	27.6425	1_8_Jan_2010
Barro Vermelho	30.0349	1_8_Jan_2010
Santa Luíza	31.8579	1_8_Jan_2010
Praia do Canto	26.9876	1_8_Jan_2010
Ilha das Caieiras	27.9162	1_8_Jan_2010
Santo André	27.977	1_8_Jan_2010
Condusa	28.7982	1_8_Jan_2010
Juncao 4	28.6986	1_8_Jan_2010
Redenção	28.6227	1_8_Jan_2010
Nova Palestina	27.8103	1_8_Jan_2010
Conquista	29.3919	1_8_Jan_2010
Resistência	28.4982	1_8_Jan_2010
Pontal de Camburí	31.6692	1_8_Jan_2010
Mata da Praia	31.5117	1_8_Jan_2010
Boa Vista	30.6647	1_8_Jan_2010
Morada de Camburí	30.8286	1_8_Jan_2010
República	30.796	1_8_Jan_2010
Goiabeiras	30.3026	1_8_Jan_2010
Antonio Honório	29.5582	1_8_Jan_2010
Juncao 5	29.4589	1_8_Jan_2010
Maria Ortiz	28.6606	1_8_Jan_2010
Jabour	29.2175	1_8_Jan_2010
Jardim Camburí	32.9957	1_8_Jan_2010
Aeroporto	31.9542	1_8_Jan_2010
Carapina	33.1433	1_8_Jan_2010
De Fátima	32.8833	1_8_Jan_2010
Jardim da Penha	31.4882	1_8_Jan_2010
Forte São João	26.3666	1_8_Jun_2008
Parque Moscoso	27.1055	1_8_Jun_2008
Vila Rubim	27.3858	1_8_Jun_2008
Santa Clara	27.2311	1_8_Jun_2008
Do Moscoso	27.0366	1_8_Jun_2008
Fonte Grande	26.7256	1_8_Jun_2008
Piedade	26.8408	1_8_Jun_2008
Centro	26.9387	1_8_Jun_2008
Santo Antônio	26.8367	1_8_Jun_2008
Inhanguetá	26.1438	1_8_Jun_2008
Estrelinha	25.7362	1_8_Jun_2008
Grande Vitória	25.3253	1_8_Jun_2008
Universitário	25.9169	1_8_Jun_2008
Juncao 2	26.3552	1_8_Jun_2008
Santa Tereza	26.9112	1_8_Jun_2008
Do Cabral	27.2274	1_8_Jun_2008
Do Quadro	27.4282	1_8_Jun_2008
Caratoíra	27.5051	1_8_Jun_2008
Juncao 1	27.5038	1_8_Jun_2008
Mário Cypreste	27.7268	1_8_Jun_2008
Ilha do Príncipe	27.851	1_8_Jun_2008
Bento Ferreira	26.5443	1_8_Jun_2008
Jesus de Nazareth	25.81	1_8_Jun_2008
Monte Belo	26.5811	1_8_Jun_2008
Ilha de Santa Maria	26.4642	1_8_Jun_2008
Romão	26.4831	1_8_Jun_2008
Cruzamento	26.5449	1_8_Jun_2008
Fradinhos	26.5419	1_8_Jun_2008
Jucutuquara	26.6176	1_8_Jun_2008
Nazareth	26.655	1_8_Jun_2008
De Lourdes	26.7997	1_8_Jun_2008
Consolação	26.9777	1_8_Jun_2008
Gurigica	27.3277	1_8_Jun_2008
Horto	26.8081	1_8_Jun_2008
Maruípe	27.1364	1_8_Jun_2008
Tabuazeiro	26.8429	1_8_Jun_2008
São Cristovão	27.4056	1_8_Jun_2008
Joana D'arc	26.6634	1_8_Jun_2008
Santa Martha	27.217	1_8_Jun_2008
Andorinhas	27.6508	1_8_Jun_2008
Itararé	28.0968	1_8_Jun_2008
Da Penha	27.5658	1_8_Jun_2008
Bonfim	27.208	1_8_Jun_2008
São Benedito	27.6429	1_8_Jun_2008
Santos Dumont	27.022	1_8_Jun_2008
Santa Cecília	26.8598	1_8_Jun_2008
Ilha do Frade	27.0685	1_8_Jun_2008
Ilha do Boi	26.2631	1_8_Jun_2008
Enseada do Suá	25.6603	1_8_Jun_2008
Santa Helena	27.0609	1_8_Jun_2008
Juncao 3	26.3961	1_8_Jun_2008
Santa Lúcia	27.9988	1_8_Jun_2008
Barro Vermelho	28.887	1_8_Jun_2008
Santa Luíza	28.5466	1_8_Jun_2008
Praia do Canto	28.2584	1_8_Jun_2008
Ilha das Caieiras	25.2226	1_8_Jun_2008
Santo André	25.2981	1_8_Jun_2008
Condusa	25.5006	1_8_Jun_2008
Juncao 4	25.4109	1_8_Jun_2008
Redenção	25.5952	1_8_Jun_2008
Nova Palestina	25.716	1_8_Jun_2008
Conquista	25.845	1_8_Jun_2008
Resistência	25.383	1_8_Jun_2008
Pontal de Camburí	28.1583	1_8_Jun_2008
Mata da Praia	26.6551	1_8_Jun_2008
Boa Vista	26.4202	1_8_Jun_2008
Morada de Camburí	26.452	1_8_Jun_2008
República	26.4661	1_8_Jun_2008
Goiabeiras	26.0987	1_8_Jun_2008
Antonio Honório	25.8119	1_8_Jun_2008
Juncao 5	25.863	1_8_Jun_2008
Maria Ortiz	25.2731	1_8_Jun_2008
Jabour	25.8489	1_8_Jun_2008
Jardim Camburí	26.561	1_8_Jun_2008
Aeroporto	27.0361	1_8_Jun_2008
Carapina	27.0139	1_8_Jun_2008
De Fátima	26.4697	1_8_Jun_2008
Jardim da Penha	27.1496	1_8_Jun_2008
Forte São João	27.0081	1_8_May_2009
Parque Moscoso	27.7746	1_8_May_2009
Vila Rubim	27.9098	1_8_May_2009
Santa Clara	27.8022	1_8_May_2009
Do Moscoso	27.5921	1_8_May_2009
Fonte Grande	27.2372	1_8_May_2009
Piedade	27.399	1_8_May_2009
Centro	27.6047	1_8_May_2009
Santo Antônio	27.3546	1_8_May_2009
Inhanguetá	26.7343	1_8_May_2009
Estrelinha	26.2391	1_8_May_2009
Grande Vitória	25.8272	1_8_May_2009
Universitário	26.462	1_8_May_2009
Juncao 2	26.9948	1_8_May_2009
Santa Tereza	27.4326	1_8_May_2009
Do Cabral	27.716	1_8_May_2009
Do Quadro	27.83	1_8_May_2009
Caratoíra	27.8182	1_8_May_2009
Juncao 1	27.7734	1_8_May_2009
Mário Cypreste	27.9388	1_8_May_2009
Ilha do Príncipe	28.1844	1_8_May_2009
Bento Ferreira	27.3673	1_8_May_2009
Jesus de Nazareth	27.009	1_8_May_2009
Monte Belo	27.2943	1_8_May_2009
Ilha de Santa Maria	27.1017	1_8_May_2009
Romão	26.9376	1_8_May_2009
Cruzamento	26.8789	1_8_May_2009
Fradinhos	26.7562	1_8_May_2009
Jucutuquara	26.9285	1_8_May_2009
Nazareth	27.0868	1_8_May_2009
De Lourdes	26.9798	1_8_May_2009
Consolação	27.2402	1_8_May_2009
Gurigica	27.6621	1_8_May_2009
Horto	27.3539	1_8_May_2009
Maruípe	26.869	1_8_May_2009
Tabuazeiro	26.6716	1_8_May_2009
São Cristovão	27.1973	1_8_May_2009
Joana D'arc	26.7969	1_8_May_2009
Santa Martha	27.2227	1_8_May_2009
Andorinhas	27.547	1_8_May_2009
Itararé	27.8385	1_8_May_2009
Da Penha	27.4135	1_8_May_2009
Bonfim	27.1326	1_8_May_2009
São Benedito	27.6183	1_8_May_2009
Santos Dumont	26.9118	1_8_May_2009
Santa Cecília	26.7823	1_8_May_2009
Ilha do Frade	27.4563	1_8_May_2009
Ilha do Boi	27.2736	1_8_May_2009
Enseada do Suá	26.9356	1_8_May_2009
Santa Helena	27.7448	1_8_May_2009
Juncao 3	27.5469	1_8_May_2009
Santa Lúcia	28.0592	1_8_May_2009
Barro Vermelho	28.4195	1_8_May_2009
Santa Luíza	28.1511	1_8_May_2009
Praia do Canto	28.1005	1_8_May_2009
Ilha das Caieiras	25.3273	1_8_May_2009
Santo André	25.3944	1_8_May_2009
Condusa	25.8802	1_8_May_2009
Juncao 4	25.7671	1_8_May_2009
Redenção	25.7052	1_8_May_2009
Nova Palestina	25.3298	1_8_May_2009
Conquista	26.0816	1_8_May_2009
Resistência	25.738	1_8_May_2009
Pontal de Camburí	27.9864	1_8_May_2009
Mata da Praia	27.1183	1_8_May_2009
Boa Vista	26.6975	1_8_May_2009
Morada de Camburí	26.8644	1_8_May_2009
República	26.994	1_8_May_2009
Goiabeiras	26.4125	1_8_May_2009
Antonio Honório	26.1207	1_8_May_2009
Juncao 5	26.3067	1_8_May_2009
Maria Ortiz	25.5394	1_8_May_2009
Jabour	26.3523	1_8_May_2009
Jardim Camburí	26.8689	1_8_May_2009
Aeroporto	26.898	1_8_May_2009
Carapina	27.3408	1_8_May_2009
De Fátima	27.007	1_8_May_2009
Jardim da Penha	27.4452	1_8_May_2009
Forte São João	28.7743	1_8_May_2010
Parque Moscoso	29.9895	1_8_May_2010
Vila Rubim	29.9975	1_8_May_2010
Santa Clara	29.9345	1_8_May_2010
Do Moscoso	29.6792	1_8_May_2010
Fonte Grande	29.4399	1_8_May_2010
Piedade	29.5172	1_8_May_2010
Centro	29.8609	1_8_May_2010
Santo Antônio	28.749	1_8_May_2010
Inhanguetá	27.687	1_8_May_2010
Estrelinha	27.2119	1_8_May_2010
Grande Vitória	27.002	1_8_May_2010
Universitário	27.2481	1_8_May_2010
Juncao 2	28.098	1_8_May_2010
Santa Tereza	29.0238	1_8_May_2010
Do Cabral	29.6322	1_8_May_2010
Do Quadro	29.7538	1_8_May_2010
Caratoíra	29.5973	1_8_May_2010
Juncao 1	29.4832	1_8_May_2010
Mário Cypreste	29.8367	1_8_May_2010
Ilha do Príncipe	30.3367	1_8_May_2010
Bento Ferreira	28.4228	1_8_May_2010
Jesus de Nazareth	28.098	1_8_May_2010
Monte Belo	28.5071	1_8_May_2010
Ilha de Santa Maria	28.3869	1_8_May_2010
Romão	28.6314	1_8_May_2010
Cruzamento	28.1978	1_8_May_2010
Fradinhos	27.9507	1_8_May_2010
Jucutuquara	28.1888	1_8_May_2010
Nazareth	28.4271	1_8_May_2010
De Lourdes	28.3262	1_8_May_2010
Consolação	28.7795	1_8_May_2010
Gurigica	29.1645	1_8_May_2010
Horto	28.8073	1_8_May_2010
Maruípe	28.1973	1_8_May_2010
Tabuazeiro	27.877	1_8_May_2010
São Cristovão	28.9882	1_8_May_2010
Joana D'arc	28.5917	1_8_May_2010
Santa Martha	29.0773	1_8_May_2010
Andorinhas	29.3433	1_8_May_2010
Itararé	29.6308	1_8_May_2010
Da Penha	29.2036	1_8_May_2010
Bonfim	28.7749	1_8_May_2010
São Benedito	29.3062	1_8_May_2010
Santos Dumont	28.2981	1_8_May_2010
Santa Cecília	27.9463	1_8_May_2010
Ilha do Frade	28.6315	1_8_May_2010
Ilha do Boi	28.3091	1_8_May_2010
Enseada do Suá	28.004	1_8_May_2010
Santa Helena	28.9988	1_8_May_2010
Juncao 3	28.8059	1_8_May_2010
Santa Lúcia	29.496	1_8_May_2010
Barro Vermelho	29.8966	1_8_May_2010
Santa Luíza	29.7983	1_8_May_2010
Praia do Canto	29.4231	1_8_May_2010
Ilha das Caieiras	26.8457	1_8_May_2010
Santo André	26.9407	1_8_May_2010
Condusa	27.2333	1_8_May_2010
Juncao 4	27.3253	1_8_May_2010
Redenção	27.2849	1_8_May_2010
Nova Palestina	26.515	1_8_May_2010
Conquista	27.6461	1_8_May_2010
Resistência	26.981	1_8_May_2010
Pontal de Camburí	29.6007	1_8_May_2010
Mata da Praia	29.0505	1_8_May_2010
Boa Vista	28.4591	1_8_May_2010
Morada de Camburí	28.7125	1_8_May_2010
República	28.9304	1_8_May_2010
Goiabeiras	28.0526	1_8_May_2010
Antonio Honório	27.6843	1_8_May_2010
Juncao 5	27.9461	1_8_May_2010
Maria Ortiz	26.8125	1_8_May_2010
Jabour	27.9921	1_8_May_2010
Jardim Camburí	28.9481	1_8_May_2010
Aeroporto	28.9236	1_8_May_2010
Carapina	28.7013	1_8_May_2010
De Fátima	28.9033	1_8_May_2010
Jardim da Penha	29.1725	1_8_May_2010
Forte São João	26.6935	1_8_May_2011
Parque Moscoso	27.8469	1_8_May_2011
Vila Rubim	28.0028	1_8_May_2011
Santa Clara	27.8475	1_8_May_2011
Do Moscoso	27.4638	1_8_May_2011
Fonte Grande	26.5696	1_8_May_2011
Piedade	27.0374	1_8_May_2011
Centro	27.5538	1_8_May_2011
Santo Antônio	26.038	1_8_May_2011
Inhanguetá	24.8017	1_8_May_2011
Estrelinha	23.9671	1_8_May_2011
Grande Vitória	23.475	1_8_May_2011
Universitário	24.4232	1_8_May_2011
Juncao 2	25.5331	1_8_May_2011
Santa Tereza	26.7239	1_8_May_2011
Do Cabral	27.5431	1_8_May_2011
Do Quadro	27.6844	1_8_May_2011
Caratoíra	27.5055	1_8_May_2011
Juncao 1	27.3097	1_8_May_2011
Mário Cypreste	27.7787	1_8_May_2011
Ilha do Príncipe	28.4432	1_8_May_2011
Bento Ferreira	26.5258	1_8_May_2011
Jesus de Nazareth	25.4117	1_8_May_2011
Monte Belo	27.0829	1_8_May_2011
Ilha de Santa Maria	26.6504	1_8_May_2011
Romão	25.8593	1_8_May_2011
Cruzamento	25.6037	1_8_May_2011
Fradinhos	25.3158	1_8_May_2011
Jucutuquara	25.7769	1_8_May_2011
Nazareth	26.3726	1_8_May_2011
De Lourdes	25.9337	1_8_May_2011
Consolação	26.5252	1_8_May_2011
Gurigica	26.6438	1_8_May_2011
Horto	26.9346	1_8_May_2011
Maruípe	25.252	1_8_May_2011
Tabuazeiro	24.8545	1_8_May_2011
São Cristovão	26.1163	1_8_May_2011
Joana D'arc	25.0169	1_8_May_2011
Santa Martha	26.0991	1_8_May_2011
Andorinhas	26.8101	1_8_May_2011
Itararé	27.3938	1_8_May_2011
Da Penha	26.6123	1_8_May_2011
Bonfim	26.0854	1_8_May_2011
São Benedito	26.7205	1_8_May_2011
Santos Dumont	25.5288	1_8_May_2011
Santa Cecília	25.1424	1_8_May_2011
Ilha do Frade	25.573	1_8_May_2011
Ilha do Boi	25.7059	1_8_May_2011
Enseada do Suá	25.1858	1_8_May_2011
Santa Helena	25.9022	1_8_May_2011
Juncao 3	25.9555	1_8_May_2011
Santa Lúcia	26.8138	1_8_May_2011
Barro Vermelho	28.1119	1_8_May_2011
Santa Luíza	28.0874	1_8_May_2011
Praia do Canto	26.626	1_8_May_2011
Ilha das Caieiras	23.4012	1_8_May_2011
Santo André	23.4646	1_8_May_2011
Condusa	23.5978	1_8_May_2011
Juncao 4	23.525	1_8_May_2011
Redenção	23.8081	1_8_May_2011
Nova Palestina	23.983	1_8_May_2011
Conquista	24.1273	1_8_May_2011
Resistência	23.8109	1_8_May_2011
Pontal de Camburí	27.4088	1_8_May_2011
Mata da Praia	25.1667	1_8_May_2011
Boa Vista	24.8724	1_8_May_2011
Morada de Camburí	24.8537	1_8_May_2011
República	24.7238	1_8_May_2011
Goiabeiras	24.5338	1_8_May_2011
Antonio Honório	23.403	1_8_May_2011
Juncao 5	23.3685	1_8_May_2011
Maria Ortiz	22.7333	1_8_May_2011
Jabour	23.3095	1_8_May_2011
Jardim Camburí	24.7052	1_8_May_2011
Aeroporto	24.6194	1_8_May_2011
Carapina	25.9898	1_8_May_2011
De Fátima	25.0166	1_8_May_2011
Jardim da Penha	25.9734	1_8_May_2011
Forte São João	34.3623	1_8_Nov_2009
Parque Moscoso	34.412	1_8_Nov_2009
Vila Rubim	34.1109	1_8_Nov_2009
Santa Clara	33.6734	1_8_Nov_2009
Do Moscoso	32.633	1_8_Nov_2009
Fonte Grande	33.4283	1_8_Nov_2009
Piedade	32.6913	1_8_Nov_2009
Centro	35.1457	1_8_Nov_2009
Santo Antônio	31.2244	1_8_Nov_2009
Inhanguetá	30.8351	1_8_Nov_2009
Estrelinha	30.7736	1_8_Nov_2009
Grande Vitória	29.5846	1_8_Nov_2009
Universitário	30.9552	1_8_Nov_2009
Juncao 2	30.5685	1_8_Nov_2009
Santa Tereza	31.172	1_8_Nov_2009
Do Cabral	32.3815	1_8_Nov_2009
Do Quadro	32.6983	1_8_Nov_2009
Caratoíra	32.1934	1_8_Nov_2009
Juncao 1	31.9725	1_8_Nov_2009
Mário Cypreste	33.379	1_8_Nov_2009
Ilha do Príncipe	35.3231	1_8_Nov_2009
Bento Ferreira	30.9388	1_8_Nov_2009
Jesus de Nazareth	30.228	1_8_Nov_2009
Monte Belo	32.1855	1_8_Nov_2009
Ilha de Santa Maria	32.9291	1_8_Nov_2009
Romão	34.1856	1_8_Nov_2009
Cruzamento	33.6752	1_8_Nov_2009
Fradinhos	33.5604	1_8_Nov_2009
Jucutuquara	33.5162	1_8_Nov_2009
Nazareth	33.2355	1_8_Nov_2009
De Lourdes	33.5572	1_8_Nov_2009
Consolação	33.7503	1_8_Nov_2009
Gurigica	34.4012	1_8_Nov_2009
Horto	33.1827	1_8_Nov_2009
Maruípe	33.9799	1_8_Nov_2009
Tabuazeiro	33.4114	1_8_Nov_2009
São Cristovão	34.1305	1_8_Nov_2009
Joana D'arc	31.1366	1_8_Nov_2009
Santa Martha	32.1787	1_8_Nov_2009
Andorinhas	32.9435	1_8_Nov_2009
Itararé	35.658	1_8_Nov_2009
Da Penha	35.0132	1_8_Nov_2009
Bonfim	34.3278	1_8_Nov_2009
São Benedito	35.1123	1_8_Nov_2009
Santos Dumont	33.9068	1_8_Nov_2009
Santa Cecília	33.6883	1_8_Nov_2009
Ilha do Frade	32.1378	1_8_Nov_2009
Ilha do Boi	31.5253	1_8_Nov_2009
Enseada do Suá	30.9283	1_8_Nov_2009
Santa Helena	33.889	1_8_Nov_2009
Juncao 3	32.7	1_8_Nov_2009
Santa Lúcia	35.5746	1_8_Nov_2009
Barro Vermelho	36.305	1_8_Nov_2009
Santa Luíza	35.1865	1_8_Nov_2009
Praia do Canto	35.1183	1_8_Nov_2009
Ilha das Caieiras	28.3607	1_8_Nov_2009
Santo André	28.4202	1_8_Nov_2009
Condusa	30.1587	1_8_Nov_2009
Juncao 4	29.3577	1_8_Nov_2009
Redenção	28.9716	1_8_Nov_2009
Nova Palestina	28.8594	1_8_Nov_2009
Conquista	29.5717	1_8_Nov_2009
Resistência	28.6041	1_8_Nov_2009
Pontal de Camburí	33.8754	1_8_Nov_2009
Mata da Praia	29.9617	1_8_Nov_2009
Boa Vista	29.5613	1_8_Nov_2009
Morada de Camburí	29.8207	1_8_Nov_2009
República	30.1604	1_8_Nov_2009
Goiabeiras	29.3476	1_8_Nov_2009
Antonio Honório	29.5625	1_8_Nov_2009
Juncao 5	30.077	1_8_Nov_2009
Maria Ortiz	29.0777	1_8_Nov_2009
Jabour	30.7053	1_8_Nov_2009
Jardim Camburí	31.0822	1_8_Nov_2009
Aeroporto	31.1446	1_8_Nov_2009
Carapina	31.641	1_8_Nov_2009
De Fátima	30.8775	1_8_Nov_2009
Jardim da Penha	31.32	1_8_Nov_2009
Forte São João	25.6632	1_8_Nov_2010
Parque Moscoso	23.9193	1_8_Nov_2010
Vila Rubim	23.8758	1_8_Nov_2010
Santa Clara	23.8297	1_8_Nov_2010
Do Moscoso	23.7848	1_8_Nov_2010
Fonte Grande	23.7444	1_8_Nov_2010
Piedade	23.7589	1_8_Nov_2010
Centro	24.2981	1_8_Nov_2010
Santo Antônio	24.2743	1_8_Nov_2010
Inhanguetá	24.3891	1_8_Nov_2010
Estrelinha	24.8062	1_8_Nov_2010
Grande Vitória	24.7477	1_8_Nov_2010
Universitário	24.2598	1_8_Nov_2010
Juncao 2	24.0565	1_8_Nov_2010
Santa Tereza	23.912	1_8_Nov_2010
Do Cabral	23.8158	1_8_Nov_2010
Do Quadro	23.8698	1_8_Nov_2010
Caratoíra	24.1084	1_8_Nov_2010
Juncao 1	24.0563	1_8_Nov_2010
Mário Cypreste	24.6767	1_8_Nov_2010
Ilha do Príncipe	24.1696	1_8_Nov_2010
Bento Ferreira	27.2283	1_8_Nov_2010
Jesus de Nazareth	27.2272	1_8_Nov_2010
Monte Belo	26.7208	1_8_Nov_2010
Ilha de Santa Maria	26.4077	1_8_Nov_2010
Romão	24.9597	1_8_Nov_2010
Cruzamento	25.1691	1_8_Nov_2010
Fradinhos	24.4829	1_8_Nov_2010
Jucutuquara	25.4183	1_8_Nov_2010
Nazareth	25.8229	1_8_Nov_2010
De Lourdes	25.3373	1_8_Nov_2010
Consolação	25.4997	1_8_Nov_2010
Gurigica	26.027	1_8_Nov_2010
Horto	26.1926	1_8_Nov_2010
Maruípe	24.8123	1_8_Nov_2010
Tabuazeiro	24.6992	1_8_Nov_2010
São Cristovão	24.9095	1_8_Nov_2010
Joana D'arc	25.0603	1_8_Nov_2010
Santa Martha	25.5712	1_8_Nov_2010
Andorinhas	25.9421	1_8_Nov_2010
Itararé	25.2745	1_8_Nov_2010
Da Penha	24.8848	1_8_Nov_2010
Bonfim	24.8473	1_8_Nov_2010
São Benedito	25.2894	1_8_Nov_2010
Santos Dumont	24.9105	1_8_Nov_2010
Santa Cecília	24.9175	1_8_Nov_2010
Ilha do Frade	27.301	1_8_Nov_2010
Ilha do Boi	27.3058	1_8_Nov_2010
Enseada do Suá	27.1962	1_8_Nov_2010
Santa Helena	26.8667	1_8_Nov_2010
Juncao 3	27.0735	1_8_Nov_2010
Santa Lúcia	26.227	1_8_Nov_2010
Barro Vermelho	26.4774	1_8_Nov_2010
Santa Luíza	26.2614	1_8_Nov_2010
Praia do Canto	26.9269	1_8_Nov_2010
Ilha das Caieiras	24.4121	1_8_Nov_2010
Santo André	24.2157	1_8_Nov_2010
Condusa	24.4224	1_8_Nov_2010
Juncao 4	24.3343	1_8_Nov_2010
Redenção	24.1328	1_8_Nov_2010
Nova Palestina	24.3165	1_8_Nov_2010
Conquista	24.367	1_8_Nov_2010
Resistência	24.6979	1_8_Nov_2010
Pontal de Camburí	26.8057	1_8_Nov_2010
Mata da Praia	27.2833	1_8_Nov_2010
Boa Vista	26.1569	1_8_Nov_2010
Morada de Camburí	26.5371	1_8_Nov_2010
República	26.9159	1_8_Nov_2010
Goiabeiras	25.8417	1_8_Nov_2010
Antonio Honório	26.1188	1_8_Nov_2010
Juncao 5	26.2982	1_8_Nov_2010
Maria Ortiz	25.4109	1_8_Nov_2010
Jabour	26.2714	1_8_Nov_2010
Jardim Camburí	27.5357	1_8_Nov_2010
Aeroporto	27.6787	1_8_Nov_2010
Carapina	27.1282	1_8_Nov_2010
De Fátima	27.4475	1_8_Nov_2010
Jardim da Penha	27.3027	1_8_Nov_2010
Forte São João	32.6738	1_8_Nov_2011
Parque Moscoso	34.8456	1_8_Nov_2011
Vila Rubim	34.8381	1_8_Nov_2011
Santa Clara	34.6179	1_8_Nov_2011
Do Moscoso	33.5985	1_8_Nov_2011
Fonte Grande	31.5737	1_8_Nov_2011
Piedade	32.4831	1_8_Nov_2011
Centro	34.3998	1_8_Nov_2011
Santo Antônio	32.8967	1_8_Nov_2011
Inhanguetá	28.1889	1_8_Nov_2011
Estrelinha	27.6792	1_8_Nov_2011
Grande Vitória	25.0635	1_8_Nov_2011
Universitário	22.2369	1_8_Nov_2011
Juncao 2	28.123	1_8_Nov_2011
Santa Tereza	31.7076	1_8_Nov_2011
Do Cabral	33.6562	1_8_Nov_2011
Do Quadro	34.1266	1_8_Nov_2011
Caratoíra	33.8217	1_8_Nov_2011
Juncao 1	33.7763	1_8_Nov_2011
Mário Cypreste	34.4391	1_8_Nov_2011
Ilha do Príncipe	35.4451	1_8_Nov_2011
Bento Ferreira	32.1246	1_8_Nov_2011
Jesus de Nazareth	31.8819	1_8_Nov_2011
Monte Belo	32.5798	1_8_Nov_2011
Ilha de Santa Maria	32.2628	1_8_Nov_2011
Romão	31.443	1_8_Nov_2011
Cruzamento	29.499	1_8_Nov_2011
Fradinhos	26.1103	1_8_Nov_2011
Jucutuquara	29.057	1_8_Nov_2011
Nazareth	30.0614	1_8_Nov_2011
De Lourdes	27.2616	1_8_Nov_2011
Consolação	28.2298	1_8_Nov_2011
Gurigica	31.9227	1_8_Nov_2011
Horto	30.7141	1_8_Nov_2011
Maruípe	25.5897	1_8_Nov_2011
Tabuazeiro	24.3878	1_8_Nov_2011
São Cristovão	30.8304	1_8_Nov_2011
Joana D'arc	31.1723	1_8_Nov_2011
Santa Martha	33.0847	1_8_Nov_2011
Andorinhas	34.1111	1_8_Nov_2011
Itararé	33.7402	1_8_Nov_2011
Da Penha	30.0759	1_8_Nov_2011
Bonfim	27.0033	1_8_Nov_2011
São Benedito	30.3347	1_8_Nov_2011
Santos Dumont	25.6194	1_8_Nov_2011
Santa Cecília	25.1386	1_8_Nov_2011
Ilha do Frade	33.3644	1_8_Nov_2011
Ilha do Boi	32.4337	1_8_Nov_2011
Enseada do Suá	31.5413	1_8_Nov_2011
Santa Helena	34.7517	1_8_Nov_2011
Juncao 3	34.2036	1_8_Nov_2011
Santa Lúcia	34.9919	1_8_Nov_2011
Barro Vermelho	36.4168	1_8_Nov_2011
Santa Luíza	35.7806	1_8_Nov_2011
Praia do Canto	35.6386	1_8_Nov_2011
Ilha das Caieiras	27.2708	1_8_Nov_2011
Santo André	27.5003	1_8_Nov_2011
Condusa	25.0426	1_8_Nov_2011
Juncao 4	27.0204	1_8_Nov_2011
Redenção	28.5329	1_8_Nov_2011
Nova Palestina	27.0592	1_8_Nov_2011
Conquista	29.5343	1_8_Nov_2011
Resistência	28.0216	1_8_Nov_2011
Pontal de Camburí	35.098	1_8_Nov_2011
Mata da Praia	32.778	1_8_Nov_2011
Boa Vista	31.1562	1_8_Nov_2011
Morada de Camburí	31.8135	1_8_Nov_2011
República	32.3989	1_8_Nov_2011
Goiabeiras	30.1855	1_8_Nov_2011
Antonio Honório	29.7568	1_8_Nov_2011
Juncao 5	30.3471	1_8_Nov_2011
Maria Ortiz	28.0059	1_8_Nov_2011
Jabour	30.5143	1_8_Nov_2011
Jardim Camburí	32.5236	1_8_Nov_2011
Aeroporto	32.6101	1_8_Nov_2011
Carapina	32.0977	1_8_Nov_2011
De Fátima	32.5989	1_8_Nov_2011
Jardim da Penha	33.5461	1_8_Nov_2011
Forte São João	32.7235	10_17_Dec_2008
Parque Moscoso	33.9183	10_17_Dec_2008
Vila Rubim	33.7873	10_17_Dec_2008
Santa Clara	33.6904	10_17_Dec_2008
Do Moscoso	33.2959	10_17_Dec_2008
Fonte Grande	32.9616	10_17_Dec_2008
Piedade	33.117	10_17_Dec_2008
Centro	33.872	10_17_Dec_2008
Santo Antônio	32.3775	10_17_Dec_2008
Inhanguetá	31.8825	10_17_Dec_2008
Estrelinha	31.6345	10_17_Dec_2008
Grande Vitória	30.3384	10_17_Dec_2008
Universitário	31.4544	10_17_Dec_2008
Juncao 2	32.0244	10_17_Dec_2008
Santa Tereza	32.4711	10_17_Dec_2008
Do Cabral	33.1498	10_17_Dec_2008
Do Quadro	33.1622	10_17_Dec_2008
Caratoíra	32.8572	10_17_Dec_2008
Juncao 1	32.8471	10_17_Dec_2008
Mário Cypreste	33.5129	10_17_Dec_2008
Ilha do Príncipe	34.3089	10_17_Dec_2008
Bento Ferreira	31.6858	10_17_Dec_2008
Jesus de Nazareth	31.721	10_17_Dec_2008
Monte Belo	31.5427	10_17_Dec_2008
Ilha de Santa Maria	31.9434	10_17_Dec_2008
Romão	32.4692	10_17_Dec_2008
Cruzamento	32.1732	10_17_Dec_2008
Fradinhos	31.9709	10_17_Dec_2008
Jucutuquara	32.1521	10_17_Dec_2008
Nazareth	32.1258	10_17_Dec_2008
De Lourdes	32.3923	10_17_Dec_2008
Consolação	32.9913	10_17_Dec_2008
Gurigica	34.1365	10_17_Dec_2008
Horto	32.635	10_17_Dec_2008
Maruípe	32.2304	10_17_Dec_2008
Tabuazeiro	31.6522	10_17_Dec_2008
São Cristovão	33.3405	10_17_Dec_2008
Joana D'arc	32.15	10_17_Dec_2008
Santa Martha	33.3485	10_17_Dec_2008
Andorinhas	33.8982	10_17_Dec_2008
Itararé	34.861	10_17_Dec_2008
Da Penha	34.1173	10_17_Dec_2008
Bonfim	33.3727	10_17_Dec_2008
São Benedito	34.3948	10_17_Dec_2008
Santos Dumont	32.5529	10_17_Dec_2008
Santa Cecília	32.0775	10_17_Dec_2008
Ilha do Frade	31.7615	10_17_Dec_2008
Ilha do Boi	31.1977	10_17_Dec_2008
Enseada do Suá	31.6413	10_17_Dec_2008
Santa Helena	33.692	10_17_Dec_2008
Juncao 3	34.2202	10_17_Dec_2008
Santa Lúcia	34.9957	10_17_Dec_2008
Barro Vermelho	35.2331	10_17_Dec_2008
Santa Luíza	34.9403	10_17_Dec_2008
Praia do Canto	34.064	10_17_Dec_2008
Ilha das Caieiras	28.891	10_17_Dec_2008
Santo André	28.8551	10_17_Dec_2008
Condusa	30.0339	10_17_Dec_2008
Juncao 4	29.6532	10_17_Dec_2008
Redenção	29.4819	10_17_Dec_2008
Nova Palestina	29.0449	10_17_Dec_2008
Conquista	30.3703	10_17_Dec_2008
Resistência	29.8384	10_17_Dec_2008
Pontal de Camburí	34.3995	10_17_Dec_2008
Mata da Praia	33.1572	10_17_Dec_2008
Boa Vista	32.1662	10_17_Dec_2008
Morada de Camburí	32.5539	10_17_Dec_2008
República	32.8627	10_17_Dec_2008
Goiabeiras	31.6044	10_17_Dec_2008
Antonio Honório	31.2778	10_17_Dec_2008
Juncao 5	31.4486	10_17_Dec_2008
Maria Ortiz	30.2359	10_17_Dec_2008
Jabour	31.3003	10_17_Dec_2008
Jardim Camburí	33.0733	10_17_Dec_2008
Aeroporto	32.8648	10_17_Dec_2008
Carapina	33.0526	10_17_Dec_2008
De Fátima	33.03	10_17_Dec_2008
Jardim da Penha	33.4144	10_17_Dec_2008
Forte São João	32.1712	10_17_Feb_2008
Parque Moscoso	32.8787	10_17_Feb_2008
Vila Rubim	33.1198	10_17_Feb_2008
Santa Clara	32.7918	10_17_Feb_2008
Do Moscoso	32.1581	10_17_Feb_2008
Fonte Grande	31.5813	10_17_Feb_2008
Piedade	31.7747	10_17_Feb_2008
Centro	32.8333	10_17_Feb_2008
Santo Antônio	31.6541	10_17_Feb_2008
Inhanguetá	30.519	10_17_Feb_2008
Estrelinha	30.0418	10_17_Feb_2008
Grande Vitória	29.5241	10_17_Feb_2008
Universitário	30.2731	10_17_Feb_2008
Juncao 2	30.7872	10_17_Feb_2008
Santa Tereza	31.7062	10_17_Feb_2008
Do Cabral	32.4308	10_17_Feb_2008
Do Quadro	32.7765	10_17_Feb_2008
Caratoíra	32.7823	10_17_Feb_2008
Juncao 1	32.7525	10_17_Feb_2008
Mário Cypreste	33.2791	10_17_Feb_2008
Ilha do Príncipe	33.8243	10_17_Feb_2008
Bento Ferreira	32.1907	10_17_Feb_2008
Jesus de Nazareth	31.7867	10_17_Feb_2008
Monte Belo	32.2512	10_17_Feb_2008
Ilha de Santa Maria	32.0634	10_17_Feb_2008
Romão	31.932	10_17_Feb_2008
Cruzamento	31.7012	10_17_Feb_2008
Fradinhos	30.8069	10_17_Feb_2008
Jucutuquara	31.9114	10_17_Feb_2008
Nazareth	32.4229	10_17_Feb_2008
De Lourdes	32.3702	10_17_Feb_2008
Consolação	33.6161	10_17_Feb_2008
Gurigica	34.6628	10_17_Feb_2008
Horto	33.3678	10_17_Feb_2008
Maruípe	31.3585	10_17_Feb_2008
Tabuazeiro	30.6003	10_17_Feb_2008
São Cristovão	32.9221	10_17_Feb_2008
Joana D'arc	31.1206	10_17_Feb_2008
Santa Martha	32.7712	10_17_Feb_2008
Andorinhas	33.6512	10_17_Feb_2008
Itararé	34.9576	10_17_Feb_2008
Da Penha	34.3688	10_17_Feb_2008
Bonfim	33.4871	10_17_Feb_2008
São Benedito	35.0592	10_17_Feb_2008
Santos Dumont	32.0885	10_17_Feb_2008
Santa Cecília	31.1957	10_17_Feb_2008
Ilha do Frade	34.4893	10_17_Feb_2008
Ilha do Boi	33.2959	10_17_Feb_2008
Enseada do Suá	32.1396	10_17_Feb_2008
Santa Helena	34.6902	10_17_Feb_2008
Juncao 3	33.7221	10_17_Feb_2008
Santa Lúcia	35.3798	10_17_Feb_2008
Barro Vermelho	35.457	10_17_Feb_2008
Santa Luíza	34.6872	10_17_Feb_2008
Praia do Canto	35.7192	10_17_Feb_2008
Ilha das Caieiras	29.3081	10_17_Feb_2008
Santo André	29.2897	10_17_Feb_2008
Condusa	29.6725	10_17_Feb_2008
Juncao 4	29.5078	10_17_Feb_2008
Redenção	29.534	10_17_Feb_2008
Nova Palestina	29.3293	10_17_Feb_2008
Conquista	29.7701	10_17_Feb_2008
Resistência	28.7711	10_17_Feb_2008
Pontal de Camburí	34.7579	10_17_Feb_2008
Mata da Praia	34.9012	10_17_Feb_2008
Boa Vista	33.4609	10_17_Feb_2008
Morada de Camburí	34.1564	10_17_Feb_2008
República	34.5582	10_17_Feb_2008
Goiabeiras	31.0488	10_17_Feb_2008
Antonio Honório	31.1075	10_17_Feb_2008
Juncao 5	31.751	10_17_Feb_2008
Maria Ortiz	29.1263	10_17_Feb_2008
Jabour	31.9714	10_17_Feb_2008
Jardim Camburí	32.4186	10_17_Feb_2008
Aeroporto	33.8848	10_17_Feb_2008
Carapina	32.2033	10_17_Feb_2008
De Fátima	31.4625	10_17_Feb_2008
Jardim da Penha	34.7399	10_17_Feb_2008
Forte São João	28.5739	10_17_Feb_2009
Parque Moscoso	25.1911	10_17_Feb_2009
Vila Rubim	24.9628	10_17_Feb_2009
Santa Clara	25.0813	10_17_Feb_2009
Do Moscoso	25.2846	10_17_Feb_2009
Fonte Grande	25.9528	10_17_Feb_2009
Piedade	25.5963	10_17_Feb_2009
Centro	26.2404	10_17_Feb_2009
Santo Antônio	25.7286	10_17_Feb_2009
Inhanguetá	26.3108	10_17_Feb_2009
Estrelinha	26.22	10_17_Feb_2009
Grande Vitória	26.3663	10_17_Feb_2009
Universitário	26.5516	10_17_Feb_2009
Juncao 2	26.1539	10_17_Feb_2009
Santa Tereza	25.4908	10_17_Feb_2009
Do Cabral	25.111	10_17_Feb_2009
Do Quadro	24.9787	10_17_Feb_2009
Caratoíra	24.9307	10_17_Feb_2009
Juncao 1	24.9874	10_17_Feb_2009
Mário Cypreste	24.9135	10_17_Feb_2009
Ilha do Príncipe	24.8637	10_17_Feb_2009
Bento Ferreira	27.8738	10_17_Feb_2009
Jesus de Nazareth	27.4506	10_17_Feb_2009
Monte Belo	28.3096	10_17_Feb_2009
Ilha de Santa Maria	28.5878	10_17_Feb_2009
Romão	27.879	10_17_Feb_2009
Cruzamento	28.0873	10_17_Feb_2009
Fradinhos	27.3231	10_17_Feb_2009
Jucutuquara	28.3144	10_17_Feb_2009
Nazareth	28.4474	10_17_Feb_2009
De Lourdes	28.5467	10_17_Feb_2009
Consolação	28.4846	10_17_Feb_2009
Gurigica	27.3723	10_17_Feb_2009
Horto	28.1686	10_17_Feb_2009
Maruípe	28.4863	10_17_Feb_2009
Tabuazeiro	27.9132	10_17_Feb_2009
São Cristovão	28.5834	10_17_Feb_2009
Joana D'arc	27.3939	10_17_Feb_2009
Santa Martha	27.7302	10_17_Feb_2009
Andorinhas	27.4933	10_17_Feb_2009
Itararé	28.0731	10_17_Feb_2009
Da Penha	28.5598	10_17_Feb_2009
Bonfim	28.7253	10_17_Feb_2009
São Benedito	27.9173	10_17_Feb_2009
Santos Dumont	28.6252	10_17_Feb_2009
Santa Cecília	28.3313	10_17_Feb_2009
Ilha do Frade	28.5156	10_17_Feb_2009
Ilha do Boi	26.7551	10_17_Feb_2009
Enseada do Suá	26.5802	10_17_Feb_2009
Santa Helena	26.4742	10_17_Feb_2009
Juncao 3	26.7735	10_17_Feb_2009
Santa Lúcia	26.5785	10_17_Feb_2009
Barro Vermelho	27.5623	10_17_Feb_2009
Santa Luíza	27.7031	10_17_Feb_2009
Praia do Canto	27.5651	10_17_Feb_2009
Ilha das Caieiras	25.6371	10_17_Feb_2009
Santo André	25.4945	10_17_Feb_2009
Condusa	26.193	10_17_Feb_2009
Juncao 4	25.8794	10_17_Feb_2009
Redenção	25.8402	10_17_Feb_2009
Nova Palestina	26.168	10_17_Feb_2009
Conquista	26.5463	10_17_Feb_2009
Resistência	26.6647	10_17_Feb_2009
Pontal de Camburí	28.1473	10_17_Feb_2009
Mata da Praia	30.0313	10_17_Feb_2009
Boa Vista	28.6883	10_17_Feb_2009
Morada de Camburí	29.0249	10_17_Feb_2009
República	29.1804	10_17_Feb_2009
Goiabeiras	27.3934	10_17_Feb_2009
Antonio Honório	27.0051	10_17_Feb_2009
Juncao 5	26.8545	10_17_Feb_2009
Maria Ortiz	25.5389	10_17_Feb_2009
Jabour	26.2193	10_17_Feb_2009
Jardim Camburí	30.8087	10_17_Feb_2009
Aeroporto	28.6702	10_17_Feb_2009
Carapina	32.2399	10_17_Feb_2009
De Fátima	32.4431	10_17_Feb_2009
Jardim da Penha	29.4109	10_17_Feb_2009
Forte São João	33.1752	10_17_Feb_2010
Parque Moscoso	36.2094	10_17_Feb_2010
Vila Rubim	35.9836	10_17_Feb_2010
Santa Clara	35.6597	10_17_Feb_2010
Do Moscoso	34.4363	10_17_Feb_2010
Fonte Grande	32.8913	10_17_Feb_2010
Piedade	33.6022	10_17_Feb_2010
Centro	35.6222	10_17_Feb_2010
Santo Antônio	34.762	10_17_Feb_2010
Inhanguetá	32.0127	10_17_Feb_2010
Estrelinha	31.8171	10_17_Feb_2010
Grande Vitória	29.8724	10_17_Feb_2010
Universitário	29.2006	10_17_Feb_2010
Juncao 2	31.7289	10_17_Feb_2010
Santa Tereza	33.071	10_17_Feb_2010
Do Cabral	34.4181	10_17_Feb_2010
Do Quadro	34.6078	10_17_Feb_2010
Caratoíra	34.554	10_17_Feb_2010
Juncao 1	35.415	10_17_Feb_2010
Mário Cypreste	36.7636	10_17_Feb_2010
Ilha do Príncipe	36.392	10_17_Feb_2010
Bento Ferreira	29.4121	10_17_Feb_2010
Jesus de Nazareth	26.8322	10_17_Feb_2010
Monte Belo	31.2479	10_17_Feb_2010
Ilha de Santa Maria	32.3635	10_17_Feb_2010
Romão	32.9698	10_17_Feb_2010
Cruzamento	32.8195	10_17_Feb_2010
Fradinhos	31.6709	10_17_Feb_2010
Jucutuquara	32.7753	10_17_Feb_2010
Nazareth	32.2713	10_17_Feb_2010
De Lourdes	32.323	10_17_Feb_2010
Consolação	31.5048	10_17_Feb_2010
Gurigica	29.391	10_17_Feb_2010
Horto	30.4136	10_17_Feb_2010
Maruípe	32.2379	10_17_Feb_2010
Tabuazeiro	31.2687	10_17_Feb_2010
São Cristovão	32.8674	10_17_Feb_2010
Joana D'arc	32.3175	10_17_Feb_2010
Santa Martha	32.6161	10_17_Feb_2010
Andorinhas	33.0069	10_17_Feb_2010
Itararé	32.2749	10_17_Feb_2010
Da Penha	32.3555	10_17_Feb_2010
Bonfim	32.3904	10_17_Feb_2010
São Benedito	31.0809	10_17_Feb_2010
Santos Dumont	32.3498	10_17_Feb_2010
Santa Cecília	32.2808	10_17_Feb_2010
Ilha do Frade	29.6844	10_17_Feb_2010
Ilha do Boi	28.1004	10_17_Feb_2010
Enseada do Suá	27.5302	10_17_Feb_2010
Santa Helena	27.1147	10_17_Feb_2010
Juncao 3	25.5713	10_17_Feb_2010
Santa Lúcia	29.1763	10_17_Feb_2010
Barro Vermelho	31.8043	10_17_Feb_2010
Santa Luíza	32.9515	10_17_Feb_2010
Praia do Canto	30.4784	10_17_Feb_2010
Ilha das Caieiras	30.2623	10_17_Feb_2010
Santo André	30.2435	10_17_Feb_2010
Condusa	29.2846	10_17_Feb_2010
Juncao 4	30.1521	10_17_Feb_2010
Redenção	30.6798	10_17_Feb_2010
Nova Palestina	30.4165	10_17_Feb_2010
Conquista	31.2042	10_17_Feb_2010
Resistência	29.9212	10_17_Feb_2010
Pontal de Camburí	33.3133	10_17_Feb_2010
Mata da Praia	32.8536	10_17_Feb_2010
Boa Vista	32.5804	10_17_Feb_2010
Morada de Camburí	32.3251	10_17_Feb_2010
República	31.6507	10_17_Feb_2010
Goiabeiras	31.3071	10_17_Feb_2010
Antonio Honório	30.5175	10_17_Feb_2010
Juncao 5	30.3404	10_17_Feb_2010
Maria Ortiz	29.4917	10_17_Feb_2010
Jabour	30.1259	10_17_Feb_2010
Jardim Camburí	31.7679	10_17_Feb_2010
Aeroporto	32.312	10_17_Feb_2010
Carapina	35.504	10_17_Feb_2010
De Fátima	33.3573	10_17_Feb_2010
Jardim da Penha	33.4838	10_17_Feb_2010
Forte São João	30.27	10_17_Feb_2011
Parque Moscoso	32.8865	10_17_Feb_2011
Vila Rubim	33.5767	10_17_Feb_2011
Santa Clara	33.2615	10_17_Feb_2011
Do Moscoso	32.8313	10_17_Feb_2011
Fonte Grande	31.7735	10_17_Feb_2011
Piedade	32.2397	10_17_Feb_2011
Centro	32.4353	10_17_Feb_2011
Santo Antônio	31.5396	10_17_Feb_2011
Inhanguetá	29.56	10_17_Feb_2011
Estrelinha	29.2058	10_17_Feb_2011
Grande Vitória	28.048	10_17_Feb_2011
Universitário	29.1335	10_17_Feb_2011
Juncao 2	30.1411	10_17_Feb_2011
Santa Tereza	32.2127	10_17_Feb_2011
Do Cabral	33.2969	10_17_Feb_2011
Do Quadro	33.8203	10_17_Feb_2011
Caratoíra	33.9629	10_17_Feb_2011
Juncao 1	33.835	10_17_Feb_2011
Mário Cypreste	34.312	10_17_Feb_2011
Ilha do Príncipe	34.6071	10_17_Feb_2011
Bento Ferreira	28.6884	10_17_Feb_2011
Jesus de Nazareth	27.3804	10_17_Feb_2011
Monte Belo	30.0047	10_17_Feb_2011
Ilha de Santa Maria	29.8129	10_17_Feb_2011
Romão	30.7747	10_17_Feb_2011
Cruzamento	30.4872	10_17_Feb_2011
Fradinhos	30.2347	10_17_Feb_2011
Jucutuquara	30.2955	10_17_Feb_2011
Nazareth	30.2623	10_17_Feb_2011
De Lourdes	30.006	10_17_Feb_2011
Consolação	29.8033	10_17_Feb_2011
Gurigica	28.9136	10_17_Feb_2011
Horto	29.5186	10_17_Feb_2011
Maruípe	29.6838	10_17_Feb_2011
Tabuazeiro	29.4892	10_17_Feb_2011
São Cristovão	29.7217	10_17_Feb_2011
Joana D'arc	29.1196	10_17_Feb_2011
Santa Martha	29.9481	10_17_Feb_2011
Andorinhas	30.7248	10_17_Feb_2011
Itararé	30.757	10_17_Feb_2011
Da Penha	29.99	10_17_Feb_2011
Bonfim	29.7463	10_17_Feb_2011
São Benedito	29.8066	10_17_Feb_2011
Santos Dumont	29.7912	10_17_Feb_2011
Santa Cecília	29.8842	10_17_Feb_2011
Ilha do Frade	27.912	10_17_Feb_2011
Ilha do Boi	26.1884	10_17_Feb_2011
Enseada do Suá	26.3438	10_17_Feb_2011
Santa Helena	26.8055	10_17_Feb_2011
Juncao 3	26.1946	10_17_Feb_2011
Santa Lúcia	29.1749	10_17_Feb_2011
Barro Vermelho	31.8655	10_17_Feb_2011
Santa Luíza	31.9502	10_17_Feb_2011
Praia do Canto	29.8867	10_17_Feb_2011
Ilha das Caieiras	27.2565	10_17_Feb_2011
Santo André	27.2435	10_17_Feb_2011
Condusa	27.8559	10_17_Feb_2011
Juncao 4	27.4272	10_17_Feb_2011
Redenção	27.7583	10_17_Feb_2011
Nova Palestina	28.8086	10_17_Feb_2011
Conquista	28.4686	10_17_Feb_2011
Resistência	28.8646	10_17_Feb_2011
Pontal de Camburí	31.7771	10_17_Feb_2011
Mata da Praia	30.2284	10_17_Feb_2011
Boa Vista	30.1023	10_17_Feb_2011
Morada de Camburí	30.2026	10_17_Feb_2011
República	30.2924	10_17_Feb_2011
Goiabeiras	29.7467	10_17_Feb_2011
Antonio Honório	30.2625	10_17_Feb_2011
Juncao 5	30.4723	10_17_Feb_2011
Maria Ortiz	29.76	10_17_Feb_2011
Jabour	30.6311	10_17_Feb_2011
Jardim Camburí	31.0158	10_17_Feb_2011
Aeroporto	31.2261	10_17_Feb_2011
Carapina	33.6667	10_17_Feb_2011
De Fátima	32.6582	10_17_Feb_2011
Jardim da Penha	30.7098	10_17_Feb_2011
Forte São João	20.7861	10_17_Jun_2009
Parque Moscoso	21.1744	10_17_Jun_2009
Vila Rubim	21.2775	10_17_Jun_2009
Santa Clara	21.2312	10_17_Jun_2009
Do Moscoso	21.182	10_17_Jun_2009
Fonte Grande	20.8834	10_17_Jun_2009
Piedade	21.0525	10_17_Jun_2009
Centro	21.0777	10_17_Jun_2009
Santo Antônio	20.7636	10_17_Jun_2009
Inhanguetá	20.145	10_17_Jun_2009
Estrelinha	19.7213	10_17_Jun_2009
Grande Vitória	19.3322	10_17_Jun_2009
Universitário	19.3814	10_17_Jun_2009
Juncao 2	20.6171	10_17_Jun_2009
Santa Tereza	21.0383	10_17_Jun_2009
Do Cabral	21.2235	10_17_Jun_2009
Do Quadro	21.2601	10_17_Jun_2009
Caratoíra	21.2879	10_17_Jun_2009
Juncao 1	21.2412	10_17_Jun_2009
Mário Cypreste	21.4426	10_17_Jun_2009
Ilha do Príncipe	21.5504	10_17_Jun_2009
Bento Ferreira	20.8713	10_17_Jun_2009
Jesus de Nazareth	19.769	10_17_Jun_2009
Monte Belo	20.7369	10_17_Jun_2009
Ilha de Santa Maria	20.9292	10_17_Jun_2009
Romão	20.5238	10_17_Jun_2009
Cruzamento	20.4249	10_17_Jun_2009
Fradinhos	20.4465	10_17_Jun_2009
Jucutuquara	20.4094	10_17_Jun_2009
Nazareth	20.4646	10_17_Jun_2009
De Lourdes	20.456	10_17_Jun_2009
Consolação	20.483	10_17_Jun_2009
Gurigica	20.1867	10_17_Jun_2009
Horto	20.3408	10_17_Jun_2009
Maruípe	20.6392	10_17_Jun_2009
Tabuazeiro	20.317	10_17_Jun_2009
São Cristovão	20.9768	10_17_Jun_2009
Joana D'arc	20.4247	10_17_Jun_2009
Santa Martha	20.8416	10_17_Jun_2009
Andorinhas	21.318	10_17_Jun_2009
Itararé	21.1858	10_17_Jun_2009
Da Penha	20.9016	10_17_Jun_2009
Bonfim	20.699	10_17_Jun_2009
São Benedito	20.6105	10_17_Jun_2009
Santos Dumont	20.5524	10_17_Jun_2009
Santa Cecília	20.4024	10_17_Jun_2009
Ilha do Frade	19.9152	10_17_Jun_2009
Ilha do Boi	19.3099	10_17_Jun_2009
Enseada do Suá	18.8159	10_17_Jun_2009
Santa Helena	19.3791	10_17_Jun_2009
Juncao 3	19.2763	10_17_Jun_2009
Santa Lúcia	20.2805	10_17_Jun_2009
Barro Vermelho	21.4865	10_17_Jun_2009
Santa Luíza	21.7993	10_17_Jun_2009
Praia do Canto	20.4809	10_17_Jun_2009
Ilha das Caieiras	20.0195	10_17_Jun_2009
Santo André	19.8716	10_17_Jun_2009
Condusa	19.042	10_17_Jun_2009
Juncao 4	19.4237	10_17_Jun_2009
Redenção	19.8649	10_17_Jun_2009
Nova Palestina	20.3617	10_17_Jun_2009
Conquista	19.835	10_17_Jun_2009
Resistência	19.5633	10_17_Jun_2009
Pontal de Camburí	21.5808	10_17_Jun_2009
Mata da Praia	21.1509	10_17_Jun_2009
Boa Vista	21.4885	10_17_Jun_2009
Morada de Camburí	21.3693	10_17_Jun_2009
República	21.1769	10_17_Jun_2009
Goiabeiras	20.5755	10_17_Jun_2009
Antonio Honório	20.3506	10_17_Jun_2009
Juncao 5	20.5548	10_17_Jun_2009
Maria Ortiz	19.905	10_17_Jun_2009
Jabour	20.8898	10_17_Jun_2009
Jardim Camburí	21.5389	10_17_Jun_2009
Aeroporto	21.3512	10_17_Jun_2009
Carapina	22.3672	10_17_Jun_2009
De Fátima	21.3262	10_17_Jun_2009
Jardim da Penha	21.1303	10_17_Jun_2009
Forte São João	23.8161	10_17_Jun_2010
Parque Moscoso	24.4655	10_17_Jun_2010
Vila Rubim	24.6717	10_17_Jun_2010
Santa Clara	24.4625	10_17_Jun_2010
Do Moscoso	24.0668	10_17_Jun_2010
Fonte Grande	23.5932	10_17_Jun_2010
Piedade	23.7848	10_17_Jun_2010
Centro	24.2566	10_17_Jun_2010
Santo Antônio	24.0035	10_17_Jun_2010
Inhanguetá	23.3982	10_17_Jun_2010
Estrelinha	23.4663	10_17_Jun_2010
Grande Vitória	22.9362	10_17_Jun_2010
Universitário	23.1463	10_17_Jun_2010
Juncao 2	23.2912	10_17_Jun_2010
Santa Tereza	23.825	10_17_Jun_2010
Do Cabral	24.2736	10_17_Jun_2010
Do Quadro	24.4754	10_17_Jun_2010
Caratoíra	24.4591	10_17_Jun_2010
Juncao 1	24.4343	10_17_Jun_2010
Mário Cypreste	24.7133	10_17_Jun_2010
Ilha do Príncipe	25.0638	10_17_Jun_2010
Bento Ferreira	24.2241	10_17_Jun_2010
Jesus de Nazareth	23.6297	10_17_Jun_2010
Monte Belo	24.4091	10_17_Jun_2010
Ilha de Santa Maria	24.097	10_17_Jun_2010
Romão	23.7877	10_17_Jun_2010
Cruzamento	23.8984	10_17_Jun_2010
Fradinhos	23.5456	10_17_Jun_2010
Jucutuquara	24.0566	10_17_Jun_2010
Nazareth	24.298	10_17_Jun_2010
De Lourdes	24.2368	10_17_Jun_2010
Consolação	24.5263	10_17_Jun_2010
Gurigica	24.6107	10_17_Jun_2010
Horto	24.5368	10_17_Jun_2010
Maruípe	24.183	10_17_Jun_2010
Tabuazeiro	23.847	10_17_Jun_2010
São Cristovão	24.6075	10_17_Jun_2010
Joana D'arc	23.3624	10_17_Jun_2010
Santa Martha	24.1463	10_17_Jun_2010
Andorinhas	24.4159	10_17_Jun_2010
Itararé	25.042	10_17_Jun_2010
Da Penha	24.8453	10_17_Jun_2010
Bonfim	24.56	10_17_Jun_2010
São Benedito	24.754	10_17_Jun_2010
Santos Dumont	24.2283	10_17_Jun_2010
Santa Cecília	23.9488	10_17_Jun_2010
Ilha do Frade	23.6385	10_17_Jun_2010
Ilha do Boi	23.6785	10_17_Jun_2010
Enseada do Suá	23.3636	10_17_Jun_2010
Santa Helena	24.0847	10_17_Jun_2010
Juncao 3	24.1941	10_17_Jun_2010
Santa Lúcia	24.6533	10_17_Jun_2010
Barro Vermelho	24.9132	10_17_Jun_2010
Santa Luíza	24.8964	10_17_Jun_2010
Praia do Canto	24.2993	10_17_Jun_2010
Ilha das Caieiras	22.6481	10_17_Jun_2010
Santo André	22.632	10_17_Jun_2010
Condusa	23.124	10_17_Jun_2010
Juncao 4	22.9234	10_17_Jun_2010
Redenção	22.5801	10_17_Jun_2010
Nova Palestina	22.3437	10_17_Jun_2010
Conquista	22.4519	10_17_Jun_2010
Resistência	22.037	10_17_Jun_2010
Pontal de Camburí	24.48	10_17_Jun_2010
Mata da Praia	23.0232	10_17_Jun_2010
Boa Vista	22.5276	10_17_Jun_2010
Morada de Camburí	22.6669	10_17_Jun_2010
República	22.7552	10_17_Jun_2010
Goiabeiras	22.5708	10_17_Jun_2010
Antonio Honório	22.0624	10_17_Jun_2010
Juncao 5	22.2375	10_17_Jun_2010
Maria Ortiz	21.8263	10_17_Jun_2010
Jabour	22.6626	10_17_Jun_2010
Jardim Camburí	24.4898	10_17_Jun_2010
Aeroporto	24.1272	10_17_Jun_2010
Carapina	24.8624	10_17_Jun_2010
De Fátima	24.5096	10_17_Jun_2010
Jardim da Penha	23.6976	10_17_Jun_2010
Forte São João	22.288	10_17_Jun_2011
Parque Moscoso	23.2589	10_17_Jun_2011
Vila Rubim	23.5498	10_17_Jun_2011
Santa Clara	23.5882	10_17_Jun_2011
Do Moscoso	23.7951	10_17_Jun_2011
Fonte Grande	23.2056	10_17_Jun_2011
Piedade	23.5968	10_17_Jun_2011
Centro	22.8828	10_17_Jun_2011
Santo Antônio	23.1532	10_17_Jun_2011
Inhanguetá	22.3134	10_17_Jun_2011
Estrelinha	22.2615	10_17_Jun_2011
Grande Vitória	21.3922	10_17_Jun_2011
Universitário	21.5106	10_17_Jun_2011
Juncao 2	22.4545	10_17_Jun_2011
Santa Tereza	23.3528	10_17_Jun_2011
Do Cabral	23.7569	10_17_Jun_2011
Do Quadro	23.8017	10_17_Jun_2011
Caratoíra	23.8085	10_17_Jun_2011
Juncao 1	23.7919	10_17_Jun_2011
Mário Cypreste	24.0294	10_17_Jun_2011
Ilha do Príncipe	23.9662	10_17_Jun_2011
Bento Ferreira	21.8551	10_17_Jun_2011
Jesus de Nazareth	21.9014	10_17_Jun_2011
Monte Belo	21.8742	10_17_Jun_2011
Ilha de Santa Maria	22.0247	10_17_Jun_2011
Romão	22.4568	10_17_Jun_2011
Cruzamento	22.1318	10_17_Jun_2011
Fradinhos	21.8158	10_17_Jun_2011
Jucutuquara	21.9591	10_17_Jun_2011
Nazareth	21.8974	10_17_Jun_2011
De Lourdes	21.6955	10_17_Jun_2011
Consolação	21.7789	10_17_Jun_2011
Gurigica	22.304	10_17_Jun_2011
Horto	21.9369	10_17_Jun_2011
Maruípe	21.2818	10_17_Jun_2011
Tabuazeiro	21.1209	10_17_Jun_2011
São Cristovão	21.5372	10_17_Jun_2011
Joana D'arc	21.6922	10_17_Jun_2011
Santa Martha	22.1495	10_17_Jun_2011
Andorinhas	22.38	10_17_Jun_2011
Itararé	21.9998	10_17_Jun_2011
Da Penha	21.7171	10_17_Jun_2011
Bonfim	21.5554	10_17_Jun_2011
São Benedito	22.0292	10_17_Jun_2011
Santos Dumont	21.4608	10_17_Jun_2011
Santa Cecília	21.4834	10_17_Jun_2011
Ilha do Frade	23.8349	10_17_Jun_2011
Ilha do Boi	23.1607	10_17_Jun_2011
Enseada do Suá	21.9721	10_17_Jun_2011
Santa Helena	23.3585	10_17_Jun_2011
Juncao 3	22.9309	10_17_Jun_2011
Santa Lúcia	22.7735	10_17_Jun_2011
Barro Vermelho	22.7462	10_17_Jun_2011
Santa Luíza	22.4191	10_17_Jun_2011
Praia do Canto	23.5712	10_17_Jun_2011
Ilha das Caieiras	21.2484	10_17_Jun_2011
Santo André	21.1939	10_17_Jun_2011
Condusa	20.9895	10_17_Jun_2011
Juncao 4	21.0447	10_17_Jun_2011
Redenção	21.1701	10_17_Jun_2011
Nova Palestina	21.0911	10_17_Jun_2011
Conquista	21.1278	10_17_Jun_2011
Resistência	20.8943	10_17_Jun_2011
Pontal de Camburí	22.8408	10_17_Jun_2011
Mata da Praia	23.3628	10_17_Jun_2011
Boa Vista	22.9254	10_17_Jun_2011
Morada de Camburí	23.0659	10_17_Jun_2011
República	23.1864	10_17_Jun_2011
Goiabeiras	22.2187	10_17_Jun_2011
Antonio Honório	21.6278	10_17_Jun_2011
Juncao 5	21.9614	10_17_Jun_2011
Maria Ortiz	20.7715	10_17_Jun_2011
Jabour	22.2292	10_17_Jun_2011
Jardim Camburí	23.3178	10_17_Jun_2011
Aeroporto	23.5041	10_17_Jun_2011
Carapina	23.2221	10_17_Jun_2011
De Fátima	22.943	10_17_Jun_2011
Jardim da Penha	23.2352	10_17_Jun_2011
Forte São João	34.141	11_18_Dec_2009
Parque Moscoso	34.7351	11_18_Dec_2009
Vila Rubim	34.9286	11_18_Dec_2009
Santa Clara	34.7996	11_18_Dec_2009
Do Moscoso	34.6177	11_18_Dec_2009
Fonte Grande	34.3863	11_18_Dec_2009
Piedade	34.4669	11_18_Dec_2009
Centro	34.819	11_18_Dec_2009
Santo Antônio	33.7603	11_18_Dec_2009
Inhanguetá	32.9518	11_18_Dec_2009
Estrelinha	32.3297	11_18_Dec_2009
Grande Vitória	31.75	11_18_Dec_2009
Universitário	32.7992	11_18_Dec_2009
Juncao 2	33.4503	11_18_Dec_2009
Santa Tereza	34.214	11_18_Dec_2009
Do Cabral	34.7167	11_18_Dec_2009
Do Quadro	34.8981	11_18_Dec_2009
Caratoíra	34.8322	11_18_Dec_2009
Juncao 1	34.6614	11_18_Dec_2009
Mário Cypreste	35.0137	11_18_Dec_2009
Ilha do Príncipe	35.6024	11_18_Dec_2009
Bento Ferreira	32.3449	11_18_Dec_2009
Jesus de Nazareth	31.7414	11_18_Dec_2009
Monte Belo	33.9572	11_18_Dec_2009
Ilha de Santa Maria	33.613	11_18_Dec_2009
Romão	34.4453	11_18_Dec_2009
Cruzamento	34.3454	11_18_Dec_2009
Fradinhos	33.9332	11_18_Dec_2009
Jucutuquara	34.3543	11_18_Dec_2009
Nazareth	34.4858	11_18_Dec_2009
De Lourdes	34.2715	11_18_Dec_2009
Consolação	34.4282	11_18_Dec_2009
Gurigica	34.0744	11_18_Dec_2009
Horto	34.4792	11_18_Dec_2009
Maruípe	33.3567	11_18_Dec_2009
Tabuazeiro	32.6679	11_18_Dec_2009
São Cristovão	33.2116	11_18_Dec_2009
Joana D'arc	31.6163	11_18_Dec_2009
Santa Martha	32.5722	11_18_Dec_2009
Andorinhas	33.1072	11_18_Dec_2009
Itararé	34.1212	11_18_Dec_2009
Da Penha	34.063	11_18_Dec_2009
Bonfim	34.0519	11_18_Dec_2009
São Benedito	34.2639	11_18_Dec_2009
Santos Dumont	33.8981	11_18_Dec_2009
Santa Cecília	33.8401	11_18_Dec_2009
Ilha do Frade	33.39	11_18_Dec_2009
Ilha do Boi	32.7581	11_18_Dec_2009
Enseada do Suá	31.6298	11_18_Dec_2009
Santa Helena	33.4453	11_18_Dec_2009
Juncao 3	32.9833	11_18_Dec_2009
Santa Lúcia	33.9402	11_18_Dec_2009
Barro Vermelho	34.4171	11_18_Dec_2009
Santa Luíza	34.0275	11_18_Dec_2009
Praia do Canto	34.1517	11_18_Dec_2009
Ilha das Caieiras	30.754	11_18_Dec_2009
Santo André	30.7191	11_18_Dec_2009
Condusa	31.2782	11_18_Dec_2009
Juncao 4	31.0195	11_18_Dec_2009
Redenção	30.7105	11_18_Dec_2009
Nova Palestina	30.4467	11_18_Dec_2009
Conquista	30.7821	11_18_Dec_2009
Resistência	30.3365	11_18_Dec_2009
Pontal de Camburí	33.9041	11_18_Dec_2009
Mata da Praia	32.1155	11_18_Dec_2009
Boa Vista	31.5267	11_18_Dec_2009
Morada de Camburí	31.6326	11_18_Dec_2009
República	31.6098	11_18_Dec_2009
Goiabeiras	31.1736	11_18_Dec_2009
Antonio Honório	30.6695	11_18_Dec_2009
Juncao 5	31.2008	11_18_Dec_2009
Maria Ortiz	29.9489	11_18_Dec_2009
Jabour	31.8573	11_18_Dec_2009
Jardim Camburí	34.1239	11_18_Dec_2009
Aeroporto	32.7972	11_18_Dec_2009
Carapina	34.1863	11_18_Dec_2009
De Fátima	34.3946	11_18_Dec_2009
Jardim da Penha	33.3317	11_18_Dec_2009
Forte São João	29.6616	11_18_Dec_2010
Parque Moscoso	30.9077	11_18_Dec_2010
Vila Rubim	31.321	11_18_Dec_2010
Santa Clara	31.0036	11_18_Dec_2010
Do Moscoso	30.5021	11_18_Dec_2010
Fonte Grande	29.7944	11_18_Dec_2010
Piedade	30.0864	11_18_Dec_2010
Centro	30.4537	11_18_Dec_2010
Santo Antônio	30.0439	11_18_Dec_2010
Inhanguetá	28.8149	11_18_Dec_2010
Estrelinha	28.2652	11_18_Dec_2010
Grande Vitória	27.2751	11_18_Dec_2010
Universitário	27.8124	11_18_Dec_2010
Juncao 2	29.1543	11_18_Dec_2010
Santa Tereza	30.1105	11_18_Dec_2010
Do Cabral	30.7706	11_18_Dec_2010
Do Quadro	31.0964	11_18_Dec_2010
Caratoíra	31.0108	11_18_Dec_2010
Juncao 1	30.8183	11_18_Dec_2010
Mário Cypreste	31.3232	11_18_Dec_2010
Ilha do Príncipe	31.7835	11_18_Dec_2010
Bento Ferreira	28.6262	11_18_Dec_2010
Jesus de Nazareth	28.3566	11_18_Dec_2010
Monte Belo	29.0115	11_18_Dec_2010
Ilha de Santa Maria	29.3572	11_18_Dec_2010
Romão	29.6486	11_18_Dec_2010
Cruzamento	29.3623	11_18_Dec_2010
Fradinhos	28.9748	11_18_Dec_2010
Jucutuquara	29.1768	11_18_Dec_2010
Nazareth	29.0704	11_18_Dec_2010
De Lourdes	28.8708	11_18_Dec_2010
Consolação	28.7513	11_18_Dec_2010
Gurigica	28.7182	11_18_Dec_2010
Horto	28.6811	11_18_Dec_2010
Maruípe	28.7478	11_18_Dec_2010
Tabuazeiro	28.5887	11_18_Dec_2010
São Cristovão	28.5715	11_18_Dec_2010
Joana D'arc	26.9037	11_18_Dec_2010
Santa Martha	27.4527	11_18_Dec_2010
Andorinhas	27.6274	11_18_Dec_2010
Itararé	29.3045	11_18_Dec_2010
Da Penha	28.9438	11_18_Dec_2010
Bonfim	28.7437	11_18_Dec_2010
São Benedito	28.9238	11_18_Dec_2010
Santos Dumont	28.726	11_18_Dec_2010
Santa Cecília	28.7612	11_18_Dec_2010
Ilha do Frade	26.6276	11_18_Dec_2010
Ilha do Boi	26.9167	11_18_Dec_2010
Enseada do Suá	28.0272	11_18_Dec_2010
Santa Helena	28.4577	11_18_Dec_2010
Juncao 3	28.2012	11_18_Dec_2010
Santa Lúcia	29.1059	11_18_Dec_2010
Barro Vermelho	29.313	11_18_Dec_2010
Santa Luíza	28.8993	11_18_Dec_2010
Praia do Canto	28.0271	11_18_Dec_2010
Ilha das Caieiras	26.2486	11_18_Dec_2010
Santo André	26.035	11_18_Dec_2010
Condusa	27.0568	11_18_Dec_2010
Juncao 4	26.4336	11_18_Dec_2010
Redenção	26.0256	11_18_Dec_2010
Nova Palestina	26.473	11_18_Dec_2010
Conquista	26.0941	11_18_Dec_2010
Resistência	25.4653	11_18_Dec_2010
Pontal de Camburí	27.4845	11_18_Dec_2010
Mata da Praia	23.6965	11_18_Dec_2010
Boa Vista	24.2421	11_18_Dec_2010
Morada de Camburí	24.1161	11_18_Dec_2010
República	24.2258	11_18_Dec_2010
Goiabeiras	24.904	11_18_Dec_2010
Antonio Honório	24.4902	11_18_Dec_2010
Juncao 5	24.5308	11_18_Dec_2010
Maria Ortiz	24.5562	11_18_Dec_2010
Jabour	24.6912	11_18_Dec_2010
Jardim Camburí	26.2356	11_18_Dec_2010
Aeroporto	26.2058	11_18_Dec_2010
Carapina	26.0066	11_18_Dec_2010
De Fátima	26.1866	11_18_Dec_2010
Jardim da Penha	24.9042	11_18_Dec_2010
Forte São João	23.8162	11_18_Jul_2008
Parque Moscoso	24.6687	11_18_Jul_2008
Vila Rubim	24.9447	11_18_Jul_2008
Santa Clara	24.6975	11_18_Jul_2008
Do Moscoso	24.3635	11_18_Jul_2008
Fonte Grande	23.9842	11_18_Jul_2008
Piedade	24.1299	11_18_Jul_2008
Centro	24.563	11_18_Jul_2008
Santo Antônio	24.1539	11_18_Jul_2008
Inhanguetá	23.7003	11_18_Jul_2008
Estrelinha	23.5796	11_18_Jul_2008
Grande Vitória	23.3201	11_18_Jul_2008
Universitário	23.6531	11_18_Jul_2008
Juncao 2	23.7593	11_18_Jul_2008
Santa Tereza	24.135	11_18_Jul_2008
Do Cabral	24.5454	11_18_Jul_2008
Do Quadro	24.7571	11_18_Jul_2008
Caratoíra	24.7032	11_18_Jul_2008
Juncao 1	24.6341	11_18_Jul_2008
Mário Cypreste	25.0958	11_18_Jul_2008
Ilha do Príncipe	25.6499	11_18_Jul_2008
Bento Ferreira	23.6082	11_18_Jul_2008
Jesus de Nazareth	23.1486	11_18_Jul_2008
Monte Belo	23.9693	11_18_Jul_2008
Ilha de Santa Maria	23.7462	11_18_Jul_2008
Romão	23.751	11_18_Jul_2008
Cruzamento	23.7622	11_18_Jul_2008
Fradinhos	23.6973	11_18_Jul_2008
Jucutuquara	23.8716	11_18_Jul_2008
Nazareth	24.0626	11_18_Jul_2008
De Lourdes	24.1296	11_18_Jul_2008
Consolação	24.3864	11_18_Jul_2008
Gurigica	24.2262	11_18_Jul_2008
Horto	24.2296	11_18_Jul_2008
Maruípe	24.3839	11_18_Jul_2008
Tabuazeiro	24.1884	11_18_Jul_2008
São Cristovão	25.004	11_18_Jul_2008
Joana D'arc	24.4057	11_18_Jul_2008
Santa Martha	24.9576	11_18_Jul_2008
Andorinhas	25.1261	11_18_Jul_2008
Itararé	25.176	11_18_Jul_2008
Da Penha	24.9608	11_18_Jul_2008
Bonfim	24.655	11_18_Jul_2008
São Benedito	24.6542	11_18_Jul_2008
Santos Dumont	24.3006	11_18_Jul_2008
Santa Cecília	23.9787	11_18_Jul_2008
Ilha do Frade	23.4048	11_18_Jul_2008
Ilha do Boi	23.0417	11_18_Jul_2008
Enseada do Suá	22.9747	11_18_Jul_2008
Santa Helena	23.6017	11_18_Jul_2008
Juncao 3	23.4715	11_18_Jul_2008
Santa Lúcia	24.283	11_18_Jul_2008
Barro Vermelho	25.0227	11_18_Jul_2008
Santa Luíza	25.3137	11_18_Jul_2008
Praia do Canto	24.2365	11_18_Jul_2008
Ilha das Caieiras	22.7547	11_18_Jul_2008
Santo André	22.8193	11_18_Jul_2008
Condusa	23.4981	11_18_Jul_2008
Juncao 4	23.332	11_18_Jul_2008
Redenção	23.0876	11_18_Jul_2008
Nova Palestina	22.5332	11_18_Jul_2008
Conquista	23.4013	11_18_Jul_2008
Resistência	23.066	11_18_Jul_2008
Pontal de Camburí	25.0089	11_18_Jul_2008
Mata da Praia	24.2543	11_18_Jul_2008
Boa Vista	23.9885	11_18_Jul_2008
Morada de Camburí	24.0772	11_18_Jul_2008
República	24.1333	11_18_Jul_2008
Goiabeiras	23.8848	11_18_Jul_2008
Antonio Honório	23.373	11_18_Jul_2008
Juncao 5	23.5018	11_18_Jul_2008
Maria Ortiz	22.728	11_18_Jul_2008
Jabour	23.4584	11_18_Jul_2008
Jardim Camburí	23.48	11_18_Jul_2008
Aeroporto	23.8235	11_18_Jul_2008
Carapina	22.6944	11_18_Jul_2008
De Fátima	22.8557	11_18_Jul_2008
Jardim da Penha	24.4775	11_18_Jul_2008
Forte São João	25.7574	12_19_Aug_2008
Parque Moscoso	25.7625	12_19_Aug_2008
Vila Rubim	26.4136	12_19_Aug_2008
Santa Clara	25.9768	12_19_Aug_2008
Do Moscoso	25.4294	12_19_Aug_2008
Fonte Grande	24.8967	12_19_Aug_2008
Piedade	25.0191	12_19_Aug_2008
Centro	25.733	12_19_Aug_2008
Santo Antônio	26.8038	12_19_Aug_2008
Inhanguetá	25.1725	12_19_Aug_2008
Estrelinha	25.0823	12_19_Aug_2008
Grande Vitória	24.5296	12_19_Aug_2008
Universitário	24.4799	12_19_Aug_2008
Juncao 2	25.098	12_19_Aug_2008
Santa Tereza	25.8201	12_19_Aug_2008
Do Cabral	26.1031	12_19_Aug_2008
Do Quadro	26.675	12_19_Aug_2008
Caratoíra	27.2906	12_19_Aug_2008
Juncao 1	27.7341	12_19_Aug_2008
Mário Cypreste	28.0883	12_19_Aug_2008
Ilha do Príncipe	27.2209	12_19_Aug_2008
Bento Ferreira	25.4459	12_19_Aug_2008
Jesus de Nazareth	24.6883	12_19_Aug_2008
Monte Belo	25.7091	12_19_Aug_2008
Ilha de Santa Maria	25.7867	12_19_Aug_2008
Romão	25.3874	12_19_Aug_2008
Cruzamento	25.2219	12_19_Aug_2008
Fradinhos	24.7328	12_19_Aug_2008
Jucutuquara	25.2181	12_19_Aug_2008
Nazareth	25.4005	12_19_Aug_2008
De Lourdes	25.0397	12_19_Aug_2008
Consolação	25.2967	12_19_Aug_2008
Gurigica	25.969	12_19_Aug_2008
Horto	25.5329	12_19_Aug_2008
Maruípe	24.9544	12_19_Aug_2008
Tabuazeiro	24.9819	12_19_Aug_2008
São Cristovão	25.5542	12_19_Aug_2008
Joana D'arc	25.9754	12_19_Aug_2008
Santa Martha	26.0897	12_19_Aug_2008
Andorinhas	26.4616	12_19_Aug_2008
Itararé	26.4187	12_19_Aug_2008
Da Penha	25.5722	12_19_Aug_2008
Bonfim	25.0823	12_19_Aug_2008
São Benedito	25.9671	12_19_Aug_2008
Santos Dumont	24.8482	12_19_Aug_2008
Santa Cecília	24.7177	12_19_Aug_2008
Ilha do Frade	26.9742	12_19_Aug_2008
Ilha do Boi	26.2681	12_19_Aug_2008
Enseada do Suá	25.0587	12_19_Aug_2008
Santa Helena	26.2157	12_19_Aug_2008
Juncao 3	25.1543	12_19_Aug_2008
Santa Lúcia	26.902	12_19_Aug_2008
Barro Vermelho	27.8345	12_19_Aug_2008
Santa Luíza	27.2868	12_19_Aug_2008
Praia do Canto	27.6473	12_19_Aug_2008
Ilha das Caieiras	24.5001	12_19_Aug_2008
Santo André	24.566	12_19_Aug_2008
Condusa	24.6113	12_19_Aug_2008
Juncao 4	24.7702	12_19_Aug_2008
Redenção	24.9981	12_19_Aug_2008
Nova Palestina	24.7498	12_19_Aug_2008
Conquista	25.4882	12_19_Aug_2008
Resistência	24.7514	12_19_Aug_2008
Pontal de Camburí	27.1103	12_19_Aug_2008
Mata da Praia	26.0187	12_19_Aug_2008
Boa Vista	24.6911	12_19_Aug_2008
Morada de Camburí	25.418	12_19_Aug_2008
República	26.2772	12_19_Aug_2008
Goiabeiras	24.6736	12_19_Aug_2008
Antonio Honório	24.889	12_19_Aug_2008
Juncao 5	25.5416	12_19_Aug_2008
Maria Ortiz	24.36	12_19_Aug_2008
Jabour	26.1545	12_19_Aug_2008
Jardim Camburí	25.4832	12_19_Aug_2008
Aeroporto	26.7609	12_19_Aug_2008
Carapina	26.1329	12_19_Aug_2008
De Fátima	25.7704	12_19_Aug_2008
Jardim da Penha	26.2144	12_19_Aug_2008
Forte São João	23.8163	12_19_Jul_2009
Parque Moscoso	24.7997	12_19_Jul_2009
Vila Rubim	24.7334	12_19_Jul_2009
Santa Clara	24.7214	12_19_Jul_2009
Do Moscoso	24.5333	12_19_Jul_2009
Fonte Grande	24.3102	12_19_Jul_2009
Piedade	24.4064	12_19_Jul_2009
Centro	24.6644	12_19_Jul_2009
Santo Antônio	23.4193	12_19_Jul_2009
Inhanguetá	22.9052	12_19_Jul_2009
Estrelinha	22.5612	12_19_Jul_2009
Grande Vitória	22.3155	12_19_Jul_2009
Universitário	23.0572	12_19_Jul_2009
Juncao 2	23.2404	12_19_Jul_2009
Santa Tereza	23.9262	12_19_Jul_2009
Do Cabral	24.4479	12_19_Jul_2009
Do Quadro	24.4644	12_19_Jul_2009
Caratoíra	24.26	12_19_Jul_2009
Juncao 1	24.091	12_19_Jul_2009
Mário Cypreste	24.332	12_19_Jul_2009
Ilha do Príncipe	24.9553	12_19_Jul_2009
Bento Ferreira	23.8743	12_19_Jul_2009
Jesus de Nazareth	23.6292	12_19_Jul_2009
Monte Belo	23.7419	12_19_Jul_2009
Ilha de Santa Maria	23.6777	12_19_Jul_2009
Romão	23.826	12_19_Jul_2009
Cruzamento	23.8102	12_19_Jul_2009
Fradinhos	23.8919	12_19_Jul_2009
Jucutuquara	23.8759	12_19_Jul_2009
Nazareth	23.906	12_19_Jul_2009
De Lourdes	24.1263	12_19_Jul_2009
Consolação	24.3035	12_19_Jul_2009
Gurigica	24.4912	12_19_Jul_2009
Horto	24.105	12_19_Jul_2009
Maruípe	24.4672	12_19_Jul_2009
Tabuazeiro	24.2607	12_19_Jul_2009
São Cristovão	24.9113	12_19_Jul_2009
Joana D'arc	24.7021	12_19_Jul_2009
Santa Martha	24.9392	12_19_Jul_2009
Andorinhas	25.0265	12_19_Jul_2009
Itararé	25.1065	12_19_Jul_2009
Da Penha	24.8733	12_19_Jul_2009
Bonfim	24.6266	12_19_Jul_2009
São Benedito	24.7625	12_19_Jul_2009
Santos Dumont	24.3994	12_19_Jul_2009
Santa Cecília	24.1802	12_19_Jul_2009
Ilha do Frade	23.9047	12_19_Jul_2009
Ilha do Boi	23.8393	12_19_Jul_2009
Enseada do Suá	23.5458	12_19_Jul_2009
Santa Helena	24.3538	12_19_Jul_2009
Juncao 3	24.2172	12_19_Jul_2009
Santa Lúcia	24.7776	12_19_Jul_2009
Barro Vermelho	25.1152	12_19_Jul_2009
Santa Luíza	25.2113	12_19_Jul_2009
Praia do Canto	24.5673	12_19_Jul_2009
Ilha das Caieiras	22.3396	12_19_Jul_2009
Santo André	22.4716	12_19_Jul_2009
Condusa	22.7647	12_19_Jul_2009
Juncao 4	22.7196	12_19_Jul_2009
Redenção	23.1198	12_19_Jul_2009
Nova Palestina	23.0887	12_19_Jul_2009
Conquista	23.8057	12_19_Jul_2009
Resistência	23.1764	12_19_Jul_2009
Pontal de Camburí	24.8886	12_19_Jul_2009
Mata da Praia	23.8865	12_19_Jul_2009
Boa Vista	23.5434	12_19_Jul_2009
Morada de Camburí	23.6789	12_19_Jul_2009
República	23.7727	12_19_Jul_2009
Goiabeiras	23.6199	12_19_Jul_2009
Antonio Honório	23.0325	12_19_Jul_2009
Juncao 5	23.2047	12_19_Jul_2009
Maria Ortiz	22.7115	12_19_Jul_2009
Jabour	23.3696	12_19_Jul_2009
Jardim Camburí	24.3452	12_19_Jul_2009
Aeroporto	24.0308	12_19_Jul_2009
Carapina	25.3672	12_19_Jul_2009
De Fátima	25.201	12_19_Jul_2009
Jardim da Penha	24.2616	12_19_Jul_2009
Forte São João	25.4131	12_19_Jul_2010
Parque Moscoso	25.4767	12_19_Jul_2010
Vila Rubim	25.8038	12_19_Jul_2010
Santa Clara	25.3368	12_19_Jul_2010
Do Moscoso	24.5465	12_19_Jul_2010
Fonte Grande	24.0146	12_19_Jul_2010
Piedade	24.13	12_19_Jul_2010
Centro	25.5691	12_19_Jul_2010
Santo Antônio	25.1661	12_19_Jul_2010
Inhanguetá	24.5474	12_19_Jul_2010
Estrelinha	24.52	12_19_Jul_2010
Grande Vitória	24.3498	12_19_Jul_2010
Universitário	24.9051	12_19_Jul_2010
Juncao 2	24.384	12_19_Jul_2010
Santa Tereza	24.6821	12_19_Jul_2010
Do Cabral	25.0652	12_19_Jul_2010
Do Quadro	25.5151	12_19_Jul_2010
Caratoíra	25.6613	12_19_Jul_2010
Juncao 1	25.7118	12_19_Jul_2010
Mário Cypreste	26.0212	12_19_Jul_2010
Ilha do Príncipe	26.4161	12_19_Jul_2010
Bento Ferreira	24.6493	12_19_Jul_2010
Jesus de Nazareth	23.5754	12_19_Jul_2010
Monte Belo	25.3263	12_19_Jul_2010
Ilha de Santa Maria	25.4378	12_19_Jul_2010
Romão	25.0605	12_19_Jul_2010
Cruzamento	25.4674	12_19_Jul_2010
Fradinhos	24.8591	12_19_Jul_2010
Jucutuquara	25.7448	12_19_Jul_2010
Nazareth	25.7323	12_19_Jul_2010
De Lourdes	26.0805	12_19_Jul_2010
Consolação	25.96	12_19_Jul_2010
Gurigica	25.3447	12_19_Jul_2010
Horto	25.5083	12_19_Jul_2010
Maruípe	26.4201	12_19_Jul_2010
Tabuazeiro	25.9627	12_19_Jul_2010
São Cristovão	26.6782	12_19_Jul_2010
Joana D'arc	26.2877	12_19_Jul_2010
Santa Martha	26.515	12_19_Jul_2010
Andorinhas	26.5385	12_19_Jul_2010
Itararé	26.4153	12_19_Jul_2010
Da Penha	26.498	12_19_Jul_2010
Bonfim	26.4824	12_19_Jul_2010
São Benedito	25.9788	12_19_Jul_2010
Santos Dumont	26.4406	12_19_Jul_2010
Santa Cecília	26.1992	12_19_Jul_2010
Ilha do Frade	25.3605	12_19_Jul_2010
Ilha do Boi	25.0597	12_19_Jul_2010
Enseada do Suá	24.2403	12_19_Jul_2010
Santa Helena	24.9001	12_19_Jul_2010
Juncao 3	24.4868	12_19_Jul_2010
Santa Lúcia	25.2691	12_19_Jul_2010
Barro Vermelho	26.1458	12_19_Jul_2010
Santa Luíza	26.554	12_19_Jul_2010
Praia do Canto	25.5703	12_19_Jul_2010
Ilha das Caieiras	23.8355	12_19_Jul_2010
Santo André	23.9358	12_19_Jul_2010
Condusa	24.5099	12_19_Jul_2010
Juncao 4	24.2789	12_19_Jul_2010
Redenção	24.5181	12_19_Jul_2010
Nova Palestina	24.4295	12_19_Jul_2010
Conquista	25.084	12_19_Jul_2010
Resistência	24.3715	12_19_Jul_2010
Pontal de Camburí	26.3448	12_19_Jul_2010
Mata da Praia	25.8675	12_19_Jul_2010
Boa Vista	25.7417	12_19_Jul_2010
Morada de Camburí	25.8221	12_19_Jul_2010
República	25.8783	12_19_Jul_2010
Goiabeiras	25.6117	12_19_Jul_2010
Antonio Honório	25.4394	12_19_Jul_2010
Juncao 5	25.628	12_19_Jul_2010
Maria Ortiz	25.0881	12_19_Jul_2010
Jabour	25.7846	12_19_Jul_2010
Jardim Camburí	25.749	12_19_Jul_2010
Aeroporto	25.9184	12_19_Jul_2010
Carapina	25.7048	12_19_Jul_2010
De Fátima	25.648	12_19_Jul_2010
Jardim da Penha	26.0087	12_19_Jul_2010
Forte São João	25.894	12_19_Jul_2011
Parque Moscoso	26.5446	12_19_Jul_2011
Vila Rubim	26.6424	12_19_Jul_2011
Santa Clara	26.5346	12_19_Jul_2011
Do Moscoso	26.3179	12_19_Jul_2011
Fonte Grande	26.0011	12_19_Jul_2011
Piedade	26.1545	12_19_Jul_2011
Centro	26.4397	12_19_Jul_2011
Santo Antônio	25.7793	12_19_Jul_2011
Inhanguetá	25.1601	12_19_Jul_2011
Estrelinha	24.5912	12_19_Jul_2011
Grande Vitória	23.6557	12_19_Jul_2011
Universitário	24.4506	12_19_Jul_2011
Juncao 2	25.4613	12_19_Jul_2011
Santa Tereza	25.9256	12_19_Jul_2011
Do Cabral	26.3376	12_19_Jul_2011
Do Quadro	26.4183	12_19_Jul_2011
Caratoíra	26.3014	12_19_Jul_2011
Juncao 1	26.2362	12_19_Jul_2011
Mário Cypreste	26.6194	12_19_Jul_2011
Ilha do Príncipe	27.087	12_19_Jul_2011
Bento Ferreira	25.4797	12_19_Jul_2011
Jesus de Nazareth	25.1338	12_19_Jul_2011
Monte Belo	25.8003	12_19_Jul_2011
Ilha de Santa Maria	25.7141	12_19_Jul_2011
Romão	25.7829	12_19_Jul_2011
Cruzamento	25.6949	12_19_Jul_2011
Fradinhos	25.4809	12_19_Jul_2011
Jucutuquara	25.7281	12_19_Jul_2011
Nazareth	25.8447	12_19_Jul_2011
De Lourdes	25.7671	12_19_Jul_2011
Consolação	25.9681	12_19_Jul_2011
Gurigica	26.1086	12_19_Jul_2011
Horto	25.9779	12_19_Jul_2011
Maruípe	25.4786	12_19_Jul_2011
Tabuazeiro	24.9795	12_19_Jul_2011
São Cristovão	26.0661	12_19_Jul_2011
Joana D'arc	25.2132	12_19_Jul_2011
Santa Martha	26.2136	12_19_Jul_2011
Andorinhas	26.5492	12_19_Jul_2011
Itararé	26.7862	12_19_Jul_2011
Da Penha	26.3483	12_19_Jul_2011
Bonfim	25.9887	12_19_Jul_2011
São Benedito	26.2908	12_19_Jul_2011
Santos Dumont	25.6886	12_19_Jul_2011
Santa Cecília	25.5299	12_19_Jul_2011
Ilha do Frade	25.7522	12_19_Jul_2011
Ilha do Boi	25.6314	12_19_Jul_2011
Enseada do Suá	25.2306	12_19_Jul_2011
Santa Helena	26.1663	12_19_Jul_2011
Juncao 3	25.8807	12_19_Jul_2011
Santa Lúcia	26.4368	12_19_Jul_2011
Barro Vermelho	27.0656	12_19_Jul_2011
Santa Luíza	27.0478	12_19_Jul_2011
Praia do Canto	26.4878	12_19_Jul_2011
Ilha das Caieiras	23.3161	12_19_Jul_2011
Santo André	23.3846	12_19_Jul_2011
Condusa	23.6683	12_19_Jul_2011
Juncao 4	23.6067	12_19_Jul_2011
Redenção	23.7001	12_19_Jul_2011
Nova Palestina	23.5534	12_19_Jul_2011
Conquista	24.057	12_19_Jul_2011
Resistência	23.8485	12_19_Jul_2011
Pontal de Camburí	26.7218	12_19_Jul_2011
Mata da Praia	25.8081	12_19_Jul_2011
Boa Vista	25.4979	12_19_Jul_2011
Morada de Camburí	25.7087	12_19_Jul_2011
República	25.8652	12_19_Jul_2011
Goiabeiras	25.1254	12_19_Jul_2011
Antonio Honório	24.7672	12_19_Jul_2011
Juncao 5	25.0054	12_19_Jul_2011
Maria Ortiz	24.0827	12_19_Jul_2011
Jabour	25.1201	12_19_Jul_2011
Jardim Camburí	25.3068	12_19_Jul_2011
Aeroporto	25.6339	12_19_Jul_2011
Carapina	25.3409	12_19_Jul_2011
De Fátima	25.2364	12_19_Jul_2011
Jardim da Penha	26.035	12_19_Jul_2011
Forte São João	26.0354	13_20_Aug_2009
Parque Moscoso	26.5109	13_20_Aug_2009
Vila Rubim	26.6799	13_20_Aug_2009
Santa Clara	26.5637	13_20_Aug_2009
Do Moscoso	26.3611	13_20_Aug_2009
Fonte Grande	25.9018	13_20_Aug_2009
Piedade	26.1313	13_20_Aug_2009
Centro	26.4171	13_20_Aug_2009
Santo Antônio	26.1148	13_20_Aug_2009
Inhanguetá	25.3154	13_20_Aug_2009
Estrelinha	24.9324	13_20_Aug_2009
Grande Vitória	23.9057	13_20_Aug_2009
Universitário	24.473	13_20_Aug_2009
Juncao 2	25.4922	13_20_Aug_2009
Santa Tereza	26.094	13_20_Aug_2009
Do Cabral	26.4715	13_20_Aug_2009
Do Quadro	26.6174	13_20_Aug_2009
Caratoíra	26.5951	13_20_Aug_2009
Juncao 1	26.5762	13_20_Aug_2009
Mário Cypreste	26.8326	13_20_Aug_2009
Ilha do Príncipe	27.0953	13_20_Aug_2009
Bento Ferreira	26.0103	13_20_Aug_2009
Jesus de Nazareth	25.7044	13_20_Aug_2009
Monte Belo	26.2952	13_20_Aug_2009
Ilha de Santa Maria	26.048	13_20_Aug_2009
Romão	25.9087	13_20_Aug_2009
Cruzamento	25.8108	13_20_Aug_2009
Fradinhos	25.257	13_20_Aug_2009
Jucutuquara	25.9094	13_20_Aug_2009
Nazareth	26.1985	13_20_Aug_2009
De Lourdes	25.9821	13_20_Aug_2009
Consolação	26.4829	13_20_Aug_2009
Gurigica	26.9397	13_20_Aug_2009
Horto	26.5716	13_20_Aug_2009
Maruípe	25.1959	13_20_Aug_2009
Tabuazeiro	24.657	13_20_Aug_2009
São Cristovão	26.2147	13_20_Aug_2009
Joana D'arc	25.763	13_20_Aug_2009
Santa Martha	26.6058	13_20_Aug_2009
Andorinhas	26.8886	13_20_Aug_2009
Itararé	27.2956	13_20_Aug_2009
Da Penha	26.7719	13_20_Aug_2009
Bonfim	26.2763	13_20_Aug_2009
São Benedito	27.0304	13_20_Aug_2009
Santos Dumont	25.6807	13_20_Aug_2009
Santa Cecília	25.3611	13_20_Aug_2009
Ilha do Frade	25.7943	13_20_Aug_2009
Ilha do Boi	25.5965	13_20_Aug_2009
Enseada do Suá	25.3769	13_20_Aug_2009
Santa Helena	26.7604	13_20_Aug_2009
Juncao 3	26.5494	13_20_Aug_2009
Santa Lúcia	27.2617	13_20_Aug_2009
Barro Vermelho	27.4178	13_20_Aug_2009
Santa Luíza	27.2837	13_20_Aug_2009
Praia do Canto	26.9477	13_20_Aug_2009
Ilha das Caieiras	23.8811	13_20_Aug_2009
Santo André	24.0159	13_20_Aug_2009
Condusa	23.916	13_20_Aug_2009
Juncao 4	24.075	13_20_Aug_2009
Redenção	24.4134	13_20_Aug_2009
Nova Palestina	24.0029	13_20_Aug_2009
Conquista	24.6874	13_20_Aug_2009
Resistência	24.0366	13_20_Aug_2009
Pontal de Camburí	26.9086	13_20_Aug_2009
Mata da Praia	25.4328	13_20_Aug_2009
Boa Vista	25.118	13_20_Aug_2009
Morada de Camburí	25.2375	13_20_Aug_2009
República	25.2124	13_20_Aug_2009
Goiabeiras	25.171	13_20_Aug_2009
Antonio Honório	24.5271	13_20_Aug_2009
Juncao 5	24.4822	13_20_Aug_2009
Maria Ortiz	23.7666	13_20_Aug_2009
Jabour	24.0566	13_20_Aug_2009
Jardim Camburí	24.4862	13_20_Aug_2009
Aeroporto	24.5253	13_20_Aug_2009
Carapina	25.1618	13_20_Aug_2009
De Fátima	24.9873	13_20_Aug_2009
Jardim da Penha	26.1296	13_20_Aug_2009
Forte São João	25.397	13_20_Aug_2010
Parque Moscoso	24.3242	13_20_Aug_2010
Vila Rubim	24.6258	13_20_Aug_2010
Santa Clara	24.6282	13_20_Aug_2010
Do Moscoso	24.9139	13_20_Aug_2010
Fonte Grande	24.9978	13_20_Aug_2010
Piedade	24.9451	13_20_Aug_2010
Centro	24.6905	13_20_Aug_2010
Santo Antônio	24.8162	13_20_Aug_2010
Inhanguetá	20.8829	13_20_Aug_2010
Estrelinha	17.9625	13_20_Aug_2010
Grande Vitória	19.7085	13_20_Aug_2010
Universitário	19.1282	13_20_Aug_2010
Juncao 2	22.9066	13_20_Aug_2010
Santa Tereza	24.8331	13_20_Aug_2010
Do Cabral	24.977	13_20_Aug_2010
Do Quadro	25.1879	13_20_Aug_2010
Caratoíra	25.6101	13_20_Aug_2010
Juncao 1	25.8628	13_20_Aug_2010
Mário Cypreste	26.1138	13_20_Aug_2010
Ilha do Príncipe	25.0802	13_20_Aug_2010
Bento Ferreira	25.3163	13_20_Aug_2010
Jesus de Nazareth	24.7715	13_20_Aug_2010
Monte Belo	25.985	13_20_Aug_2010
Ilha de Santa Maria	25.5034	13_20_Aug_2010
Romão	25.4298	13_20_Aug_2010
Cruzamento	25.358	13_20_Aug_2010
Fradinhos	24.8476	13_20_Aug_2010
Jucutuquara	25.515	13_20_Aug_2010
Nazareth	25.8749	13_20_Aug_2010
De Lourdes	25.7946	13_20_Aug_2010
Consolação	26.3075	13_20_Aug_2010
Gurigica	26.4079	13_20_Aug_2010
Horto	26.366	13_20_Aug_2010
Maruípe	25.0621	13_20_Aug_2010
Tabuazeiro	24.2998	13_20_Aug_2010
São Cristovão	25.8911	13_20_Aug_2010
Joana D'arc	24.7317	13_20_Aug_2010
Santa Martha	25.8556	13_20_Aug_2010
Andorinhas	26.1741	13_20_Aug_2010
Itararé	26.7627	13_20_Aug_2010
Da Penha	26.4303	13_20_Aug_2010
Bonfim	26.1073	13_20_Aug_2010
São Benedito	26.6206	13_20_Aug_2010
Santos Dumont	25.507	13_20_Aug_2010
Santa Cecília	25.0796	13_20_Aug_2010
Ilha do Frade	23.7704	13_20_Aug_2010
Ilha do Boi	24.1942	13_20_Aug_2010
Enseada do Suá	24.3711	13_20_Aug_2010
[truncated: 10,637 more rows]
